# Supplementary material for: A straightforward access to guaiazulene derivatives using palladium-catalysed sp2 or sp3 C–H bond functionalisation
Source: Royal Society of Chemistry journal article supplement (doi:10.1039/c3cc42226g), 2013-01-01
Supplement: c3cc42226g.pdf [file c3cc42226g.pdf]

# A Straightforward Access to Guaiazulene Derivatives using Palladium-Catalysed $sp^2$ or $sp^3$ C-H Bond Functionalisation

Liqin Zhao,<sup>a</sup> Christian Bruneau,<sup>a</sup> Henri Doucet\*<sup>a</sup>

<sup>a</sup> Institut des Sciences Chimiques de Rennes, UMR 6226 CNRS-Université de Rennes 1 "Organométalliques: Matériaux et Catalyse", 35042 Rennes Cedex, France. Tel: 33 (0)2 23 23 63 84; E-mail: henri.doucet@univ-rennes1.fr.

## Contents

|                                                                                                                                                                 | Page |
|-----------------------------------------------------------------------------------------------------------------------------------------------------------------|------|
| 1. General                                                                                                                                                      | S-1  |
| 2. Procedures for the synthesis of compounds <b>1a-17a</b> , <b>1b</b> , <b>6b-8b</b> , <b>14b</b> , <b>18b</b> , <b>1c</b> and <b>14c</b> and characterization | S-1  |
| 3. NMR spectra                                                                                                                                                  | S-10 |

**General.** All reactions were performed in Schlenk tubes under argon. DMAc or ethylbenzene analytical grade were not distilled before use. Potassium acetate 99+, cesium acetate and potassium carbonate 99% were used. Commercial guaiazulene and aryl bromides were used without purification. <sup>1</sup>H (400 or 500 MHz), <sup>13</sup>C (100 or 125 MHz) spectra were recorded in CDCl<sub>3</sub> solutions. Chemical shifts are reported in ppm relative to CDCl<sub>3</sub> (<sup>1</sup>H: 7.29 and <sup>13</sup>C: 77.0). Flash chromatography was performed on silica gel (230-400 mesh) using pentane/ether.

### General procedure for the synthesis of **1a-17a**

As a typical experiment, reaction of the aryl bromide (1 mmol), 7-isopropyl-1,4-dimethylazulene (0.296 g, 1.5 mmol), CsOAc (0.767 g, 4 mmol) and K<sub>2</sub>CO<sub>3</sub> (0.552 g, 4 mmol) at 150 °C during 16 h in DMAc (5 mL) in the presence of PdCl(C<sub>3</sub>H<sub>5</sub>)(dppb) (12.2 mg, 0.02 mmol) under argon afforded the corresponding arylation products after extraction with dichloromethane, evaporation and filtration on silica gel.

### 4-(7-Isopropyl-1-methylazulen-4-ylmethyl)-benzotrile (**1a**)

From 4-bromobenzotrile (0.182 g, 1 mmol), 7-isopropyl-1,4-dimethylazulene (0.296 g, 1.5 mmol), CsOAc (0.767 g, 4 mmol) and K<sub>2</sub>CO<sub>3</sub> (0.552 g, 4 mmol) in the presence of PdCl(C<sub>3</sub>H<sub>5</sub>)(dppb) (12.2 mg, 0.02 mmol) **1a** was obtained in 61% (0.182 g) yield as a blue oil. Eluent pentane:diethylether 10:1

<sup>1</sup>H NMR (400 MHz, CDCl<sub>3</sub>): δ 8.16 (s, 1H), 7.58 (d, *J* = 3.2 Hz, 1H), 7.45 (d, *J* = 8.3 Hz, 2H), 7.36 (d, *J* = 9.7 Hz, 1H), 7.29 (d, *J* = 8.3 Hz, 2H), 7.20 (d, *J* = 3.2 Hz, 1H), 6.86 (d, *J* = 9.7 Hz, 1H), 4.46 (s, 2H), 3.02 (sept.,

$J = 6.8$  Hz, 1H), 2.60 (s, 3H), 1.29 (d,  $J = 6.8$  Hz, 6H).  $^{13}\text{C}$  NMR (100 MHz,  $\text{CDCl}_3$ ):  $\delta$  146.2, 144.2, 140.7, 137.3, 137.2, 136.8, 135.1, 133.7, 132.3, 129.2, 126.0, 125.0, 119.0, 113.1, 110.1, 43.3, 38.3, 24.7, 12.9. Elemental analysis: calcd (%) for  $\text{C}_{22}\text{H}_{21}\text{N}$  (299.41): C 88.25, H 7.07; found: C 88.10, H 7.14.

#### **4-(7-Isopropyl-1-methylazulen-4-ylmethyl)-benzaldehyde (2a)**

From 4-bromobenzaldehyde (0.185 g, 1 mmol), 7-isopropyl-1,4-dimethylazulene (0.296 g, 1.5 mmol), CsOAc (0.767 g, 4 mmol) and  $\text{K}_2\text{CO}_3$  (0.552 g, 4 mmol) in the presence of  $\text{PdCl}(\text{C}_3\text{H}_5)(\text{dppb})$  (12.2 mg, 0.02 mmol) **2a** was obtained in 45% (0.136 g) yield as a blue oil. Eluent pentane:diethylether 10:1

$^1\text{H}$  NMR (400 MHz,  $\text{CDCl}_3$ ):  $\delta$  9.87 (s, 1H), 8.15 (s, 1H), 7.68 (d,  $J = 8.0$  Hz, 2H), 7.59 (d,  $J = 3.2$  Hz, 1H), 7.40-7.33 (m, 3H), 7.23 (d,  $J = 3.2$  Hz, 1H), 6.89 (d,  $J = 10.7$  Hz, 1H), 4.49 (s, 2H), 3.02 (sept.,  $J = 6.8$  Hz, 1H), 2.60 (s, 3H), 1.29 (d,  $J = 6.8$  Hz, 6H).  $^{13}\text{C}$  NMR (100 MHz,  $\text{CDCl}_3$ ):  $\delta$  191.9, 147.9, 144.8, 140.5, 137.4, 137.1, 136.8, 135.1, 134.8, 133.7, 130.0, 129.2, 125.9, 125.1, 113.1, 43.5, 38.3, 24.7, 12.9. Elemental analysis: calcd (%) for  $\text{C}_{22}\text{H}_{22}\text{O}$  (302.41): C 87.38, H 7.33; found: C 87.57, H 7.50.

#### **1-[4-(7-Isopropyl-1-methylazulen-4-ylmethyl)-phenyl]-propan-1-one (3a)**

From 4-bromopropiophenone (0.213 g, 1 mmol), 7-isopropyl-1,4-dimethylazulene (0.296 g, 1.5 mmol), CsOAc (0.767 g, 4 mmol) and  $\text{K}_2\text{CO}_3$  (0.552 g, 4 mmol) in the presence of  $\text{PdCl}(\text{C}_3\text{H}_5)(\text{dppb})$  (12.2 mg, 0.02 mmol) **3a** was obtained in 46% (0.152 g) yield as a blue oil. Eluent pentane:diethylether 10:1

$^1\text{H}$  NMR (400 MHz,  $\text{CDCl}_3$ ):  $\delta$  8.15 (s, 1H), 7.77 (d,  $J = 8.0$  Hz, 2H), 7.58 (s, 1H), 7.35 (d,  $J = 10.7$  Hz, 1H), 7.28 (d,  $J = 8.0$  Hz, 1H), 7.17 (s, 1H), 6.89 (d,  $J = 10.7$  Hz, 1H), 4.46 (s, 2H), 3.00 (sept.,  $J = 6.8$  Hz, 1H), 2.86 (q,  $J = 7.6$  Hz, 2H), 2.60 (s, 3H), 1.29 (d,  $J = 6.8$  Hz, 6H), 1.12 (t,  $J = 7.6$  Hz, 3H).  $^{13}\text{C}$  NMR (100 MHz,  $\text{CDCl}_3$ ):  $\delta$  200.4, 146.0, 145.2, 140.4, 137.5, 137.0, 136.7, 135.1, 135.1, 133.6, 128.8, 128.3, 125.8, 125.1, 113.1, 43.2, 38.3, 24.7, 12.9, 8.3. Elemental analysis: calcd (%) for  $\text{C}_{24}\text{H}_{26}\text{O}$  (330.46): C 87.23, H 7.93; found: C 87.14, H 7.99.

#### **Ethyl 4-(7-isopropyl-1-methylazulen-4-ylmethyl)-benzoate (4a)**

From ethyl 4-bromobenzoate (0.229 g, 1 mmol), 7-isopropyl-1,4-dimethylazulene (0.296 g, 1.5 mmol), CsOAc (0.767 g, 4 mmol) and  $\text{K}_2\text{CO}_3$  (0.552 g, 4 mmol) in the presence of  $\text{PdCl}(\text{C}_3\text{H}_5)(\text{dppb})$  (12.2 mg, 0.02 mmol) **4a** was obtained in 67% (0.232 g) yield as a blue oil. Eluent pentane:diethylether 10:1

$^1\text{H}$  NMR (400 MHz,  $\text{CDCl}_3$ ):  $\delta$  8.14 (s, 1H), 7.84 (d,  $J = 8.1$  Hz, 2H), 7.57 (d,  $J = 3.5$  Hz, 1H), 7.33 (d,  $J = 10.7$  Hz, 1H), 7.28-7.22 (m, 3H), 6.87 (d,  $J = 10.7$  Hz, 1H), 4.46 (s, 2H), 4.25 (q,  $J = 7.6$  Hz, 2H), 3.00 (sept.,

$J = 6.8$  Hz, 1H), 2.60 (s, 3H), 1.30-1.25 (m, 9H).  $^{13}\text{C}$  NMR (100 MHz,  $\text{CDCl}_3$ ):  $\delta$  166.5, 145.9, 145.3, 140.3, 137.5, 137.0, 136.7, 135.1, 133.6, 129.8, 128.7, 128.6, 125.8, 125.1, 113.1, 60.8, 43.2, 38.3, 24.7, 14.3, 12.9. Elemental analysis: calcd (%) for  $\text{C}_{24}\text{H}_{26}\text{O}_2$  (346.46): C 83.20, H 7.56; found: C 83.34, H 7.40.

#### **7-Isopropyl-1-methyl-4-(4-trifluoromethylbenzyl)-azulene (5a)**

From 4-(trifluoromethyl)bromobenzene (0.225 g, 1 mmol), 7-isopropyl-1,4-dimethylazulene (0.296 g, 1.5 mmol), CsOAc (0.767 g, 4 mmol) and  $\text{K}_2\text{CO}_3$  (0.552 g, 4 mmol) in the presence of  $\text{PdCl}(\text{C}_3\text{H}_5)(\text{dppb})$  (12.2 mg, 0.02 mmol) **5a** was obtained in 68% (0.233 g) yield as a blue oil. Eluent pentane:diethylether 10:1

$^1\text{H}$  NMR (400 MHz,  $\text{CDCl}_3$ ):  $\delta$  8.14 (s, 1H), 7.58 (d,  $J = 3.6$  Hz, 1H), 7.40 (d,  $J = 8.1$  Hz, 2H), 7.34 (d,  $J = 10.7$  Hz, 1H), 7.29 (d,  $J = 8.1$  Hz, 2H), 7.23 (d,  $J = 3.6$  Hz, 1H), 6.87 (d,  $J = 10.7$  Hz, 1H), 4.45 (s, 2H), 3.00 (sept.,  $J = 6.8$  Hz, 1H), 2.59 (s, 3H), 1.28 (d,  $J = 6.8$  Hz, 6H).  $^{13}\text{C}$  NMR (100 MHz,  $\text{CDCl}_3$ ):  $\delta$  145.0, 144.7, 140.5, 137.5, 137.1, 136.8, 135.1, 133.7, 128.9, 128.6 (q,  $J = 32.2$  Hz), 125.9, 125.3 (q,  $J = 3.7$  Hz), 125.1, 124.2 (q,  $J = 271.9$  Hz), 113.1, 43.0, 38.3, 24.7, 13.0. Elemental analysis: calcd (%) for  $\text{C}_{22}\text{H}_{21}\text{F}_3$  (342.40): C 77.17, H 6.18; found: C 77.25, H 6.07.

#### **4-(4-Chlorobenzyl)-7-isopropyl-1-methyl-azulene (6a)**

From 4-bromochlorobenzene (0.191 g, 1 mmol), 7-isopropyl-1,4-dimethylazulene (0.296 g, 1.5 mmol), CsOAc (0.767 g, 4 mmol) and  $\text{K}_2\text{CO}_3$  (0.552 g, 4 mmol) in the presence of  $\text{PdCl}(\text{C}_3\text{H}_5)(\text{dppb})$  (12.2 mg, 0.02 mmol) **6a** was obtained in 66% (0.203 g) yield as a blue oil. Eluent pentane

$^1\text{H}$  NMR (400 MHz,  $\text{CDCl}_3$ ):  $\delta$  8.14 (s, 1H), 7.58 (d,  $J = 3.6$  Hz, 1H), 7.34 (d,  $J = 9.7$  Hz, 1H), 7.24 (d,  $J = 3.6$  Hz, 1H), 7.10 (s, 4H), 6.87 (d,  $J = 9.7$  Hz, 1H), 4.38 (s, 2H), 3.00 (sept.,  $J = 6.8$  Hz, 1H), 2.60 (s, 3H), 1.28 (d,  $J = 6.8$  Hz, 6H).  $^{13}\text{C}$  NMR (100 MHz,  $\text{CDCl}_3$ ):  $\delta$  145.7, 140.3, 139.1, 137.4, 136.9, 136.7, 135.1, 133.5, 132.0, 130.0, 128.6, 125.7, 125.0, 113.0, 42.5, 38.3, 24.7, 12.9. Elemental analysis: calcd (%) for  $\text{C}_{21}\text{H}_{21}\text{Cl}$  (308.84): C 81.67, H 6.85; found: C 81.40, H 6.99.

#### **4-(4-Fluorobenzyl)-7-isopropyl-1-methyl-azulene (7a)**

From 4-bromofluorobenzene (0.175 g, 1 mmol), 7-isopropyl-1,4-dimethylazulene (0.296 g, 1.5 mmol), CsOAc (0.767 g, 4 mmol) and  $\text{K}_2\text{CO}_3$  (0.552 g, 4 mmol) in the presence of  $\text{PdCl}(\text{C}_3\text{H}_5)(\text{dppb})$  (12.2 mg, 0.02 mmol) **7a** was obtained in 52% (0.152 g) yield as a blue oil. Eluent pentane:diethylether 20:1

$^1\text{H}$  NMR (400 MHz,  $\text{CDCl}_3$ ):  $\delta$  8.13 (s, 1H), 7.58 (d,  $J = 3.7$  Hz, 1H), 7.34 (d,  $J = 9.3$  Hz, 1H), 7.27 (d,  $J = 3.7$  Hz, 1H), 7.17-7.12 (m, 2H), 6.90-6.80 (m, 3H), 4.39 (s, 2H), 3.00 (sept.,  $J = 6.8$  Hz, 1H), 2.60 (s, 3H), 1.28 (d,  $J = 6.8$  Hz, 6H).  $^{13}\text{C}$  NMR (100 MHz,  $\text{CDCl}_3$ ):  $\delta$  161.7 (d,  $J = 246.5$  Hz), 146.1, 140.2, 137.4, 136.9,

136.6, 136.2, 135.1, 133.5, 130.0 (d,  $J = 7.9$  Hz), 125.7, 125.0, 115.2 (d,  $J = 21.3$  Hz), 112.9, 42.4, 38.3, 24.7, 12.9. Elemental analysis: calcd (%) for  $C_{21}H_{21}F$  (292.39): C 86.26, H 7.24; found: C 86.15, H 7.16.

### **7-Isopropyl-1-methyl-4-(4-methylbenzyl)-azulene (8a)**

From 4-bromotoluene (0.171 g, 1 mmol), 7-isopropyl-1,4-dimethylazulene (0.296 g, 1.5 mmol), CsOAc (0.767 g, 4 mmol) and  $K_2CO_3$  (0.552 g, 4 mmol) in the presence of  $PdCl(C_3H_5)(dppb)$  (12.2 mg, 0.02 mmol) **8a** was obtained in 42% (0.121 g) yield as a blue oil. Eluent pentane

$^1H$  NMR (400 MHz,  $CDCl_3$ ):  $\delta$  8.12 (s, 1H), 7.57 (s, 1H), 7.32 (d,  $J = 10.7$  Hz, 1H), 7.18 (s, 1H), 7.09 (d,  $J = 8.0$  Hz, 2H), 6.98 (d,  $J = 8.0$  Hz, 2H), 6.90 (d,  $J = 10.7$  Hz, 1H), 4.39 (s, 2H), 2.99 (sept.,  $J = 6.8$  Hz, 1H), 2.59 (s, 3H), 2.21 (s, 3H), 1.27 (d,  $J = 6.8$  Hz, 6H).  $^{13}C$  NMR (100 MHz,  $CDCl_3$ ):  $\delta$  146.8, 139.9, 137.6, 137.5, 136.7, 136.5, 135.7, 135.1, 133.3, 129.1, 128.6, 125.5, 125.1, 112.9, 42.7, 38.2, 24.7, 21.0, 12.9. Elemental analysis: calcd (%) for  $C_{22}H_{24}$  (288.43): C 91.61, H 8.39; found: C 91.75, H 8.30.

### **4-(4-tert-Butylbenzyl)-7-isopropyl-1-methyl-azulene (9a)**

From 4-*tert*-butylbromobenzene (0.213 g, 1 mmol), 7-isopropyl-1,4-dimethylazulene (0.296 g, 1.5 mmol), CsOAc (0.767 g, 4 mmol) and  $K_2CO_3$  (0.552 g, 4 mmol) in the presence of  $PdCl(C_3H_5)(dppb)$  (12.2 mg, 0.02 mmol) **9a** was obtained in 48% (0.158 g) yield as a blue oil. Eluent pentane

$^1H$  NMR (400 MHz,  $CDCl_3$ ):  $\delta$  8.12 (s, 1H), 7.57 (d,  $J = 3.2$  Hz, 1H), 7.35-7.25 (m, 2H), 7.19 (d,  $J = 8.4$  Hz, 2H), 7.16 (d,  $J = 8.4$  Hz, 2H), 6.93 (d,  $J = 10.7$  Hz, 1H), 4.39 (s, 2H), 2.98 (sept.,  $J = 6.8$  Hz, 1H), 2.59 (s, 3H), 1.27 (d,  $J = 6.8$  Hz, 6H), 1.20 (s, 9H).  $^{13}C$  NMR (100 MHz,  $CDCl_3$ ):  $\delta$  149.0, 146.8, 139.9, 137.7, 137.5, 136.7, 136.5, 135.2, 133.4, 128.3, 125.5, 125.4, 125.3, 113.0, 42.7, 38.3, 34.4, 31.4, 24.8, 13.0. Elemental analysis: calcd (%) for  $C_{25}H_{30}$  (330.51): C 90.85, H 9.15; found: C 90.74, H 9.20.

### **3-(7-Isopropyl-1-methylazulen-4-ylmethyl)-benzotrile (10a)**

From 3-bromobenzotrile (0.182 g, 1 mmol), 7-isopropyl-1,4-dimethylazulene (0.296 g, 1.5 mmol), CsOAc (0.767 g, 4 mmol) and  $K_2CO_3$  (0.552 g, 4 mmol) in the presence of  $PdCl(C_3H_5)(dppb)$  (12.2 mg, 0.02 mmol) **10a** was obtained in 54% (0.161 g) yield as a blue oil. Eluent pentane:diethylether 10:1

$^1H$  NMR (400 MHz,  $CDCl_3$ ):  $\delta$  8.16 (s, 1H), 7.59 (d,  $J = 3.6$  Hz, 1H), 7.50-7.30 (m, 4H), 7.24 (t,  $J = 7.7$  Hz, 1H), 7.20-7.15 (m, 1H), 6.87 (d,  $J = 10.7$  Hz, 1H), 4.43 (s, 2H), 3.02 (sept.,  $J = 6.8$  Hz, 1H), 2.60 (s, 3H), 1.30 (d,  $J = 6.8$  Hz, 6H).  $^{13}C$  NMR (100 MHz,  $CDCl_3$ ):  $\delta$  144.3, 142.1, 140.7, 137.3, 137.2, 136.9, 135.1, 133.8, 133.0, 132.0, 130.1, 129.2, 126.1, 124.9, 118.9, 113.0, 112.5, 42.8, 38.2, 24.7, 12.9. Elemental analysis: calcd (%) for  $C_{22}H_{21}N$  (299.41): C 88.25, H 7.07; found: C 88.01, H 7.17.

### **1-[3-(7-Isopropyl-1-methylazulen-4-ylmethyl)-phenyl]-ethanone (11a)**

From 3-bromoacetophenone (0.199 g, 1 mmol), 7-isopropyl-1,4-dimethylazulene (0.296 g, 1.5 mmol), CsOAc (0.767 g, 4 mmol) and K<sub>2</sub>CO<sub>3</sub> (0.552 g, 4 mmol) in the presence of PdCl(C<sub>3</sub>H<sub>5</sub>)(dppb) (12.2 mg, 0.02 mmol) **11a** was obtained in 51% (0.161 g) yield as a blue oil. Eluent pentane:diethylether 10:1

<sup>1</sup>H NMR (400 MHz, CDCl<sub>3</sub>): δ 8.14 (s, 1H), 7.86 (s, 1H), 7.67 (d, *J* = 7.7 Hz, 1H), 7.59 (d, *J* = 3.6 Hz, 1H), 7.30-7.20 (m, 4H), 6.9 (d, *J* = 10.7 Hz, 1H), 4.47 (s, 2H), 3.00 (sept., *J* = 6.8 Hz, 1H), 2.60 (s, 3H), 2.48 (s, 3H), 1.28 (d, *J* = 6.8 Hz, 6H). <sup>13</sup>C NMR (100 MHz, CDCl<sub>3</sub>): δ 198.3, 145.5, 141.2, 140.3, 137.4, 137.3, 136.9, 136.8, 135.1, 133.6, 133.3, 128.7, 128.4, 126.5, 125.8, 125.0, 113.0, 43.1, 38.3, 26.7, 24.7, 12.9. Elemental analysis: calcd (%) for C<sub>23</sub>H<sub>24</sub>O (316.44): C 87.30, H 7.64; found: C 87.48, H 7.51.

### **7-Isopropyl-1-methyl-4-(3-trifluoromethyl-benzyl)-azulene (12a)**

From 3-(trifluoromethyl)bromobenzene (0.225 g, 1 mmol), 7-isopropyl-1,4-dimethylazulene (0.296 g, 1.5 mmol), CsOAc (0.767 g, 4 mmol) and K<sub>2</sub>CO<sub>3</sub> (0.552 g, 4 mmol) in the presence of PdCl(C<sub>3</sub>H<sub>5</sub>)(dppb) (12.2 mg, 0.02 mmol) **12a** was obtained in 71% (0.243 g) yield as a blue oil. Eluent pentane:diethylether 10:1

<sup>1</sup>H NMR (400 MHz, CDCl<sub>3</sub>): δ 8.15 (s, 1H), 7.58 (d, *J* = 1.6 Hz, 1H), 7.50 (s, 1H), 7.40-7.30 (m, 3H), 7.30-7.20 (m, 2H), 6.87 (d, *J* = 10.7 Hz, 1H), 4.46 (s, 2H), 3.00 (sept., *J* = 6.8 Hz, 1H), 2.60 (s, 3H), 1.28 (d, *J* = 6.8 Hz, 6H). <sup>13</sup>C NMR (100 MHz, CDCl<sub>3</sub>): δ 145.0, 141.5, 140.4, 137.5, 137.1, 136.8, 135.1, 133.6, 132.0, 130.8 (q, *J* = 32.0 Hz), 128.9, 125.9, 125.3 (s, *J* = 3.8 Hz), 124.9, 124.1 (q, *J* = 272.3 Hz), 123.2 (q, *J* = 3.7 Hz), 113.0, 42.9, 38.3, 24.7, 12.9. Elemental analysis: calcd (%) for C<sub>22</sub>H<sub>21</sub>F<sub>3</sub> (342.40): C 77.17, H 6.18; found: C 77.45, H 6.24.

### **4-(3-Chlorobenzyl)-7-isopropyl-1-methyl-azulene (13a)**

From 3-bromochlorobenzene (0.191 g, 1 mmol), 7-isopropyl-1,4-dimethylazulene (0.296 g, 1.5 mmol), CsOAc (0.767 g, 4 mmol) and K<sub>2</sub>CO<sub>3</sub> (0.552 g, 4 mmol) in the presence of PdCl(C<sub>3</sub>H<sub>5</sub>)(dppb) (12.2 mg, 0.02 mmol) **13a** was obtained in 69% (0.212 g) yield as a blue oil. Eluent pentane

<sup>1</sup>H NMR (400 MHz, CDCl<sub>3</sub>): δ 8.22 (s, 1H), 7.66 (d, *J* = 3.6 Hz, 1H), 7.42 (d, *J* = 10.7 Hz, 1H), 7.33 (d, *J* = 3.6 Hz, 1H), 7.27 (s, 1H), 7.20-7.15 (m, 3H), 6.96 (d, *J* = 10.7 Hz, 1H), 4.46 (s, 2H), 3.09 (sept., *J* = 6.8 Hz, 1H), 2.68 (s, 3H), 1.36 (d, *J* = 6.8 Hz, 6H). <sup>13</sup>C NMR (100 MHz, CDCl<sub>3</sub>): δ 145.3, 142.6, 140.3, 137.5, 137.0, 136.7, 135.1, 134.2, 133.6, 129.7, 128.7, 126.9, 126.5, 125.8, 125.0, 113.0, 42.9, 38.3, 24.7, 13.0. Elemental analysis: calcd (%) for C<sub>21</sub>H<sub>21</sub>Cl (308.84): C 81.67, H 6.85; found: C 81.79, H 6.70.

#### **7-Isopropyl-1-methyl-4-(3-methylbenzyl)-azulene (14a)**

From 3-bromotoluene (0.171 g, 1 mmol), 7-isopropyl-1,4-dimethylazulene (0.296 g, 1.5 mmol), CsOAc (0.767 g, 4 mmol) and K<sub>2</sub>CO<sub>3</sub> (0.552 g, 4 mmol) in the presence of PdCl(C<sub>3</sub>H<sub>5</sub>)(dppb) (12.2 mg, 0.02 mmol) **14a** was obtained in 54% (0.155 g) yield as a blue oil. Eluent pentane

<sup>1</sup>H NMR (400 MHz, CDCl<sub>3</sub>): δ 8.12 (s, 1H), 7.57 (s, 1H), 7.35-7.25 (m, 2H), 7.10-6.95 (m, 3H), 6.95-6.88 (m, 2H), 4.38 (s, 2H), 2.98 (sept., *J* = 6.8 Hz, 1H), 2.59 (s, 3H), 2.20 (s, 3H), 1.27 (d, *J* = 6.8 Hz, 6H). <sup>13</sup>C NMR (100 MHz, CDCl<sub>3</sub>): δ 146.7, 140.5, 139.9, 138.1, 137.7, 136.8, 136.5, 135.1, 133.4, 129.5, 128.4, 127.0, 125.8, 125.5, 125.2, 113.0, 43.1, 38.3, 24.8, 21.4, 13.0. Elemental analysis: calcd (%) for C<sub>22</sub>H<sub>24</sub> (288.43): C 91.61, H 8.39; found: C 91.77, H 8.57.

#### **4-(2-Fluorobenzyl)-7-isopropyl-1-methyl-azulene (15a)**

From 2-bromofluorobenzene (0.175 g, 1 mmol), 7-isopropyl-1,4-dimethylazulene (0.296 g, 1.5 mmol), CsOAc (0.767 g, 4 mmol) and K<sub>2</sub>CO<sub>3</sub> (0.552 g, 4 mmol) in the presence of PdCl(C<sub>3</sub>H<sub>5</sub>)(dppb) (12.2 mg, 0.02 mmol) **15a** was obtained in 63% (0.184 g) yield as a blue oil. Eluent pentane:diethylether 10:1

<sup>1</sup>H NMR (400 MHz, CDCl<sub>3</sub>): δ 8.13 (d, *J* = 2.0 Hz, 1H), 7.57 (s, 1H), 7.34 (dd, *J* = 10.4, 2.0 Hz, 1H), 7.15-6.80 (m, 6H), 4.44 (s, 2H), 2.99 (sept., *J* = 6.8 Hz, 1H), 2.59 (s, 3H), 1.28 (d, *J* = 6.8 Hz, 6H). <sup>13</sup>C NMR (100 MHz, CDCl<sub>3</sub>): δ 160.8 (d, *J* = 246.0 Hz), 145.1, 140.3, 137.5, 136.9, 136.7, 135.0, 133.5, 130.6 (d, *J* = 4.2 Hz), 127.9 (d, *J* = 8.1 Hz), 127.2 (d, *J* = 15.7 Hz), 125.6, 124.7, 124.0 (d, *J* = 3.5 Hz), 115.2 (d, *J* = 22.3 Hz), 112.9, 38.3, 35.4, 24.7, 12.9. Elemental analysis: calcd (%) for C<sub>21</sub>H<sub>21</sub>F (292.39): C 86.26, H 7.24; found: C 86.44, H 7.51.

#### **7-Isopropyl-1-methyl-4-naphthalen-2-ylmethylazulene (16a)**

From 2-bromonaphthalene (0.207 g, 1 mmol), 7-isopropyl-1,4-dimethylazulene (0.296 g, 1.5 mmol), CsOAc (0.767 g, 4 mmol) and K<sub>2</sub>CO<sub>3</sub> (0.552 g, 4 mmol) in the presence of PdCl(C<sub>3</sub>H<sub>5</sub>)(dppb) (12.2 mg, 0.02 mmol) **16a** was obtained in 45% (0.146 g) yield as a blue oil. Eluent pentane

<sup>1</sup>H NMR (400 MHz, CDCl<sub>3</sub>): δ 8.15 (s, 1H), 7.70-7.60 (m, 4H), 7.59 (d, *J* = 3.6 Hz, 1H), 7.40-7.28 (m, 5H), 6.94 (d, *J* = 10.7 Hz, 1H), 4.58 (s, 2H), 3.00 (sept., *J* = 6.8 Hz, 1H), 2.61 (s, 3H), 1.27 (d, *J* = 6.8 Hz, 6H). <sup>13</sup>C NMR (100 MHz, CDCl<sub>3</sub>): δ 146.3, 140.1, 138.2, 137.7, 136.9, 136.6, 135.1, 133.6, 133.4, 132.2, 128.1, 127.7, 127.6, 127.3, 127.0, 125.9, 125.6, 125.4, 125.2, 113.0, 43.3, 38.3, 24.7, 13.0. Elemental analysis: calcd (%) for C<sub>25</sub>H<sub>24</sub> (324.46): C 92.54, H 7.46; found: C 92.67, H 7.66.

#### **3-(7-Isopropyl-1-methylazulen-4-ylmethyl)-pyridine (17a)**

From 3-bromopyridine (0.158 g, 1 mmol), 7-isopropyl-1,4-dimethylazulene (0.296 g, 1.5 mmol), CsOAc (0.767 g, 4 mmol) and K<sub>2</sub>CO<sub>3</sub> (0.552 g, 4 mmol) in the presence of PdCl(C<sub>3</sub>H<sub>5</sub>)(dppb) (12.2 mg, 0.02 mmol) **17a** was obtained in 61% (0.168 g) yield as a blue oil. Eluent pentane

<sup>1</sup>H NMR (400 MHz, CDCl<sub>3</sub>): δ 8.55 (s, 1H), 8.35 (d, *J* = 3.8 Hz, 1H), 8.14 (s, 1H), 7.59 (d, *J* = 3.6 Hz, 1H), 7.44 (d, *J* = 7.7 Hz, 1H), 7.35 (d, *J* = 10.7 Hz, 1H), 7.25 (d, *J* = 3.6 Hz, 1H), 7.04 (dd, *J* = 7.7, 4.0 Hz, 1H), 6.88 (d, *J* = 10.7 Hz, 1H), 4.40 (s, 2H), 3.00 (sept., *J* = 6.8 Hz, 1H), 2.60 (s, 3H), 1.28 (d, *J* = 6.8 Hz, 6H). <sup>13</sup>C NMR (100 MHz, CDCl<sub>3</sub>): δ 149.9, 147.8, 144.8, 140.5, 137.3, 137.1, 136.8, 136.1, 135.8, 135.1, 133.6, 125.9, 124.9, 123.4, 113.0, 40.4, 38.3, 24.7, 12.9. Elemental analysis: calcd (%) for C<sub>20</sub>H<sub>21</sub>N (275.39): C 87.23, H 7.69; found: C 87.45, H 7.87.

#### General procedure for the synthesis of **1b**, **6b-8b**, **14b** and **18b**

As a typical experiment, reaction of the aryl bromide (1 mmol), 7-isopropyl-1,4-dimethylazulene (0.296 g, 1.5 mmol), and KOAc (0.784 g, 8 mmol) at 150 °C during 16 h in ethylbenzene (5 mL) in the presence of PdCl(C<sub>3</sub>H<sub>5</sub>)(dppb) (12.2 mg, 0.02 mmol) under argon afforded the corresponding arylation product after extraction with dichloromethane, evaporation and filtration on silica gel.

#### 4-(7-Isopropyl-1,4-dimethylazulen-2-yl)-benzotrile (**1b**)

From 4-bromobenzotrile (0.182 g, 1 mmol), 7-isopropyl-1,4-dimethylazulene (0.296 g, 1.5 mmol), KOAc (0.784 g, 8 mmol) in ethylbenzene in the presence of PdCl(C<sub>3</sub>H<sub>5</sub>)(dppb) (12.2 mg, 0.02 mmol) **1b** was obtained in 38% (0.114 g) yield (containing around 10% of **1c**) as a blue oil. Eluent pentane:diethylether 100:1

<sup>1</sup>H NMR (400 MHz, CDCl<sub>3</sub>): δ 8.21 (s, 1H), 7.67 (s, 4H), 7.37 (d, *J* = 10.6 Hz, 1H), 7.25 (bs, 1H), 7.01 (d, *J* = 10.6 Hz, 1H), 3.04 (sept., *J* = 6.8 Hz, 1H), 2.81 (s, 3H), 2.63 (s, 3H), 1.31 (d, *J* = 6.8 Hz, 6H). <sup>13</sup>C NMR (100 MHz, CDCl<sub>3</sub>): δ 145.6, 145.2, 143.3, 141.5, 137.9, 136.8, 135.6, 134.4, 132.1, 130.2, 126.3, 121.6, 119.2, 113.2, 110.3, 38.4, 24.8, 24.2, 11.6. Elemental analysis: calcd (%) for C<sub>22</sub>H<sub>21</sub>N (299.41): C 88.25, H 7.07; found: C 88.20, H 7.21.

#### 2-(4-Chlorophenyl)-7-isopropyl-1,4-dimethylazulene (**6b**)

From 4-bromochlorobenzene (0.191 g, 1 mmol), 7-isopropyl-1,4-dimethylazulene (0.296 g, 1.5 mmol), KOAc (0.784 g, 8 mmol) in ethylbenzene in the presence of PdCl(C<sub>3</sub>H<sub>5</sub>)(dppb) (12.2 mg, 0.02 mmol) **6b** was obtained in 53% (0.163 g) yield as a blue oil. Eluent pentane:diethylether 100:1



$^1\text{H}$  NMR (400 MHz,  $\text{CDCl}_3$ ):  $\delta$  8.18 (s, 1H), 7.51 (d,  $J = 8.5$  Hz, 2H), 7.37 (d,  $J = 8.5$  Hz, 2H), 7.33 (d,  $J = 10.6$  Hz, 1H), 7.24 (s, 1H), 6.99 (d,  $J = 10.6$  Hz, 1H), 3.02 (sept.,  $J = 6.8$  Hz, 1H), 2.77 (s, 3H), 2.62 (s, 3H), 1.30 (d,  $J = 6.8$  Hz, 6H).  $^{13}\text{C}$  NMR (100 MHz,  $\text{CDCl}_3$ ):  $\delta$  146.8, 144.2, 141.1, 137.8, 136.9, 136.7, 134.7, 133.6, 133.0, 130.9, 128.6, 126.0, 121.3, 113.2, 38.4, 24.8, 24.2, 11.6. Elemental analysis: calcd (%) for  $\text{C}_{21}\text{H}_{21}\text{Cl}$  (308.84): C 81.67, H 6.85; found: C 81.68, H 6.97.

#### **2-(4-Fluorophenyl)-7-isopropyl-1,4-dimethylazulene (7b)**

From 4-bromofluorobenzene (0.175 g, 1 mmol), 7-isopropyl-1,4-dimethylazulene (0.296 g, 1.5 mmol), KOAc (0.784 g, 8 mmol) in ethylbenzene in the presence of  $\text{PdCl}(\text{C}_3\text{H}_5)(\text{dppb})$  (12.2 mg, 0.02 mmol) **7b** was obtained in 51% (0.149 g) yield as a blue oil. Eluent pentane:diethylether 100:1

$^1\text{H}$  NMR (400 MHz,  $\text{CDCl}_3$ ):  $\delta$  8.18 (s, 1H), 7.55 (dd,  $J = 7.9, 5.6$  Hz, 2H), 7.33 (d,  $J = 10.6$  Hz, 1H), 7.24 (s, 1H), 7.10 (t,  $J = 8.4$  Hz, 2H), 6.99 (d,  $J = 10.6$  Hz, 1H), 3.02 (sept.,  $J = 6.8$  Hz, 1H), 2.78 (s, 3H), 2.62 (s, 3H), 1.31 (d,  $J = 6.8$  Hz, 6H).  $^{13}\text{C}$  NMR (100 MHz,  $\text{CDCl}_3$ ):  $\delta$  162.2 (d,  $J = 246.5$  Hz), 147.2, 143.9, 141.0, 137.8, 136.7, 134.5, 134.4, 133.4, 131.1 (d,  $J = 7.9$  Hz), 125.9, 121.2, 115.3 (d,  $J = 21.3$  Hz), 113.3, 38.4, 24.8, 24.2, 11.6. Elemental analysis: calcd (%) for  $\text{C}_{21}\text{H}_{21}\text{F}$  (292.39): C 86.26, H 7.24; found: C 86.48, H 7.34.

#### **7-Isopropyl-1,4-dimethyl-2-*p*-tolylazulene (8b)**

From 4-bromotoluene (0.171 g, 1 mmol), 7-isopropyl-1,4-dimethylazulene (0.296 g, 1.5 mmol), KOAc (0.784 g, 8 mmol) in ethylbenzene in the presence of  $\text{PdCl}(\text{C}_3\text{H}_5)(\text{dppb})$  (12.2 mg, 0.02 mmol) **8b** was obtained in 56% (0.161 g) yield as a blue oil. Eluent pentane

$^1\text{H}$  NMR (400 MHz,  $\text{CDCl}_3$ ):  $\delta$  8.17 (s, 1H), 7.50 (d,  $J = 8.5$  Hz, 2H), 7.31 (d,  $J = 10.6$  Hz, 1H), 7.23 (d,  $J = 8.5$  Hz, 2H), 7.20 (s, 1H), 6.97 (d,  $J = 10.6$  Hz, 1H), 3.03 (sept.,  $J = 6.8$  Hz, 1H), 2.78 (s, 3H), 2.65 (s, 3H), 2.36 (s, 3H), 1.31 (d,  $J = 6.8$  Hz, 6H).  $^{13}\text{C}$  NMR (100 MHz,  $\text{CDCl}_3$ ):  $\delta$  148.3, 143.5, 140.8, 137.8, 136.8, 136.6, 135.5, 134.2, 133.1, 129.6, 129.1, 125.7, 121.3, 113.5, 38.4, 24.8, 24.2, 21.3, 11.6. Elemental analysis: calcd (%) for  $\text{C}_{22}\text{H}_{24}$  (288.43): C 91.61, H 8.39; found: C 91.78, H 8.24.

#### **7-Isopropyl-1,4-dimethyl-2-*m*-tolylazulene (14b)**

From 3-bromotoluene (0.171 g, 1 mmol), 7-isopropyl-1,4-dimethylazulene (0.296 g, 1.5 mmol), KOAc (0.784 g, 8 mmol) in ethylbenzene in the presence of  $\text{PdCl}(\text{C}_3\text{H}_5)(\text{dppb})$  (12.2 mg, 0.02 mmol) **14b** was obtained in 54% (0.156 g) yield as a blue oil. Eluent pentane

$^1\text{H}$  NMR (400 MHz,  $\text{CDCl}_3$ ):  $\delta$  8.17 (d,  $J = 1.7$  Hz, 1H), 7.45-7.25 (m, 5H), 7.31 (d,  $J = 10.6$  Hz, 1H), 7.10 (d,  $J = 7.1$  Hz, 1H), 6.97 (d,  $J = 10.6$  Hz, 1H), 3.03 (sept.,  $J = 6.8$  Hz, 1H), 2.78 (s, 3H), 2.64 (s, 3H), 2.38 (s,



3H), 1.30 (d,  $J = 6.8$  Hz, 6H).  $^{13}\text{C}$  NMR (100 MHz,  $\text{CDCl}_3$ ):  $\delta$  148.5, 143.7, 140.8, 138.4, 137.9, 137.8, 136.6, 134.3, 133.3, 130.4, 128.2, 127.8, 126.8, 125.7, 121.4, 113.7, 38.4, 24.8, 24.2, 21.6, 11.6. Elemental analysis: calcd (%) for  $\text{C}_{22}\text{H}_{24}$  (288.43): C 91.61, H 8.39; found: C 91.79, H 8.49.

#### **2-(4-Phenyl)-7-isopropyl-1,4-dimethylazulene (18b)**

From bromobenzene (0.157 g, 1 mmol), 7-isopropyl-1,4-dimethylazulene (0.296 g, 1.5 mmol), KOAc (0.784 g, 8 mmol) in ethylbenzene in the presence of  $\text{PdCl}(\text{C}_3\text{H}_5)(\text{dppb})$  (12.2 mg, 0.02 mmol) **18b** was obtained in 56% (0.153 g) yield as a blue oil. Eluent pentane

$^1\text{H}$  NMR (400 MHz,  $\text{CDCl}_3$ ):  $\delta$  8.18 (s, 1H), 7.59 (d,  $J = 8.5$  Hz, 2H), 7.41 (t,  $J = 8.5$  Hz, 2H), 7.33-7.25 (m, 3H), 6.98 (d,  $J = 10.6$  Hz, 1H), 3.03 (sept.,  $J = 6.8$  Hz, 1H), 2.78 (s, 3H), 2.65 (s, 3H), 1.31 (d,  $J = 6.8$  Hz, 6H).  $^{13}\text{C}$  NMR (100 MHz,  $\text{CDCl}_3$ ):  $\delta$  148.3, 143.8, 140.9, 138.5, 137.8, 136.7, 134.4, 133.4, 129.7, 128.4, 127.0, 125.8, 121.4, 113.6, 38.4, 24.8, 24.2, 11.6. Elemental analysis: calcd (%) for  $\text{C}_{21}\text{H}_{22}$  (274.40): C 91.92, H 8.08; found: C 92.02, H 7.99.

#### **General procedure for the synthesis of 1c and 14c**

As a typical experiment, reaction of the aryl bromide (1 mmol), 7-isopropyl-1,4-dimethylazulene (0.296 g, 1.5 mmol), and KOAc (0.784 g, 8 mmol) at 150 °C during 16 h in DMAc (5 mL) in the presence of  $\text{PdCl}(\text{C}_3\text{H}_5)(\text{dppb})$  (12.2 mg, 0.02 mmol) under argon afforded the corresponding arylation product after extraction with dichloromethane, evaporation and filtration on silica gel.

#### **4-(5-Isopropyl-3,8-dimethylazulen-1-yl)-benzotrile (1c)**

From 4-bromobenzotrile (0.182 g, 1 mmol), 7-isopropyl-1,4-dimethylazulene (0.296 g, 1.5 mmol), KOAc (0.784 g, 8 mmol) in DMAc in the presence of  $\text{PdCl}(\text{C}_3\text{H}_5)(\text{dppb})$  (12.2 mg, 0.02 mmol) **1c** was obtained in 51% (0.153 g) yield as a green oil. Eluent pentane:diethylether 100:1

$^1\text{H}$  NMR (400 MHz,  $\text{CDCl}_3$ ):  $\delta$  8.16 (d,  $J = 2.1$  Hz, 1H), 7.57 (d,  $J = 8.0$  Hz, 2H), 7.46 (s, 1H), 7.39 (d,  $J = 8.0$  Hz, 2H), 7.36 (dd,  $J = 10.7, 2.1$  Hz, 1H), 6.92 (d,  $J = 10.7$  Hz, 1H), 3.02 (sept.,  $J = 6.8$  Hz, 1H), 2.59 (s, 3H), 2.33 (s, 3H), 1.30 (d,  $J = 6.8$  Hz, 6H).  $^{13}\text{C}$  NMR (100 MHz,  $\text{CDCl}_3$ ):  $\delta$  146.4, 145.7, 141.0, 139.7, 138.5, 135.3, 134.2, 132.2, 131.1, 131.0, 127.7, 127.0, 124.7, 119.4, 109.2, 37.9, 27.9, 24.6, 12.8. Elemental analysis: calcd (%) for  $\text{C}_{22}\text{H}_{21}\text{N}$  (299.41): C 88.25, H 7.07; found: C 88.24, H 7.25.

#### **7-Isopropyl-1,4-dimethyl-3-*m*-tolylazulene (14c)**

From 3-bromotoluene (0.171 g, 1 mmol), 7-isopropyl-1,4-dimethylazulene (0.296 g, 1.5 mmol), KOAc (0.784 g, 8 mmol) in DMAc in the presence of PdCl(C<sub>3</sub>H<sub>5</sub>)(dppb) (12.2 mg, 0.02 mmol) **14c** was obtained in 38% (0.110 g) yield as a green oil. Eluent pentane:diethylether 100:1

<sup>1</sup>H NMR (400 MHz, CDCl<sub>3</sub>): δ 8.26 (d, *J* = 2.1 Hz, 1H), 7.47 (s, 1H), 7.28 (dd, *J* = 10.7, 2.1 Hz, 1H), 7.22-7.03 (m, 4H), 6.82 (d, *J* = 10.7 Hz, 1H), 3.00 (sept., *J* = 6.8 Hz, 1H), 2.60 (s, 3H), 2.34 (s, 3H), 2.32 (s, 3H), 1.30 (d, *J* = 6.8 Hz, 6H). <sup>13</sup>C NMR (100 MHz, CDCl<sub>3</sub>): δ 146.1, 141.4, 140.1, 139.6, 137.7, 136.6, 134.8, 133.7, 131.6, 131.5, 129.5, 127.8, 127.1, 126.7, 126.6, 124.0, 37.9, 27.6, 24.7, 21.5, 12.8. Elemental analysis: calcd (%) for C<sub>22</sub>H<sub>24</sub> (288.43): C 91.61, H 8.39; found: C 91.87, H 8.17.

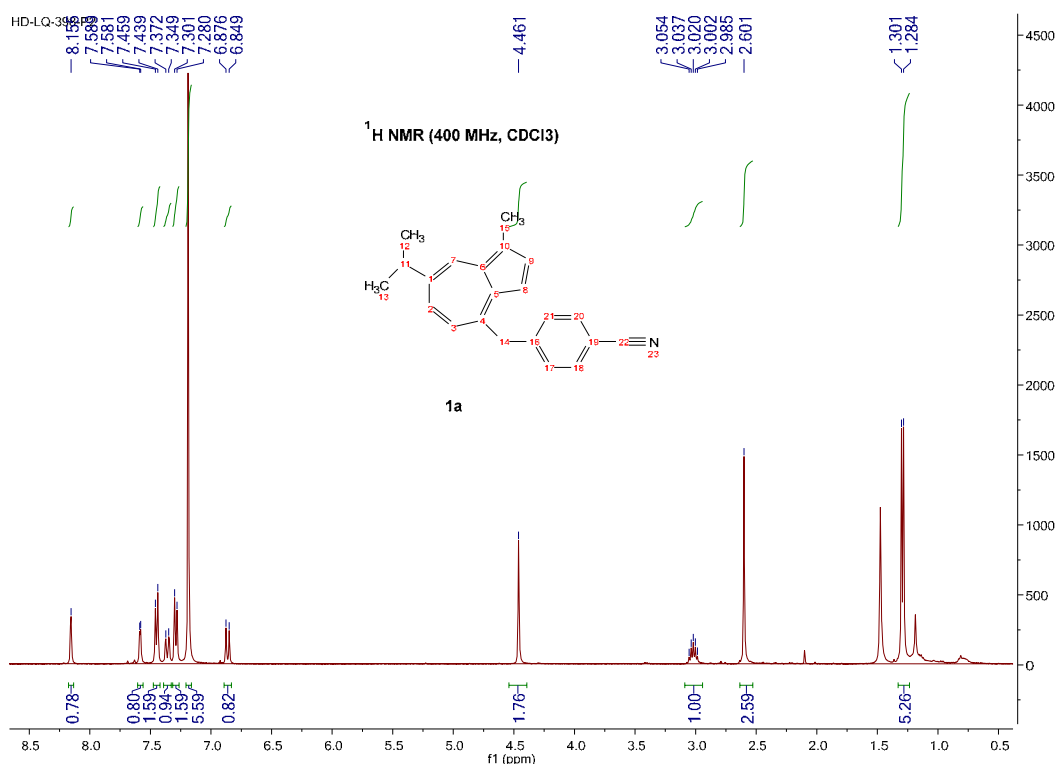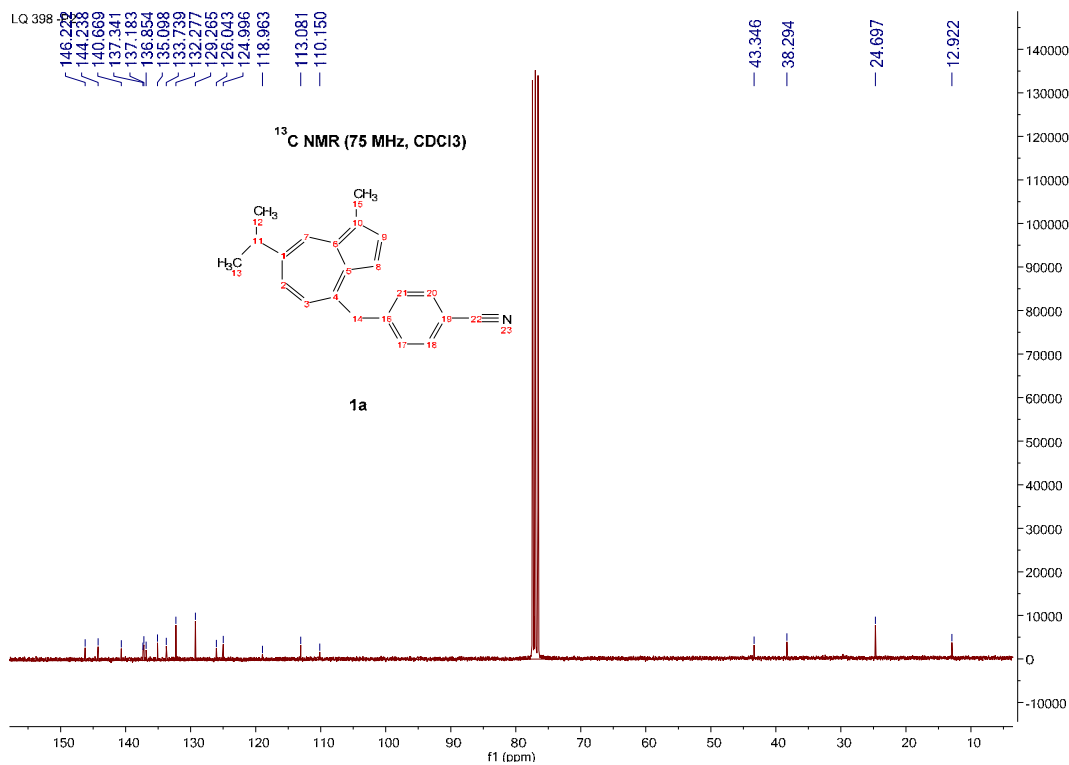

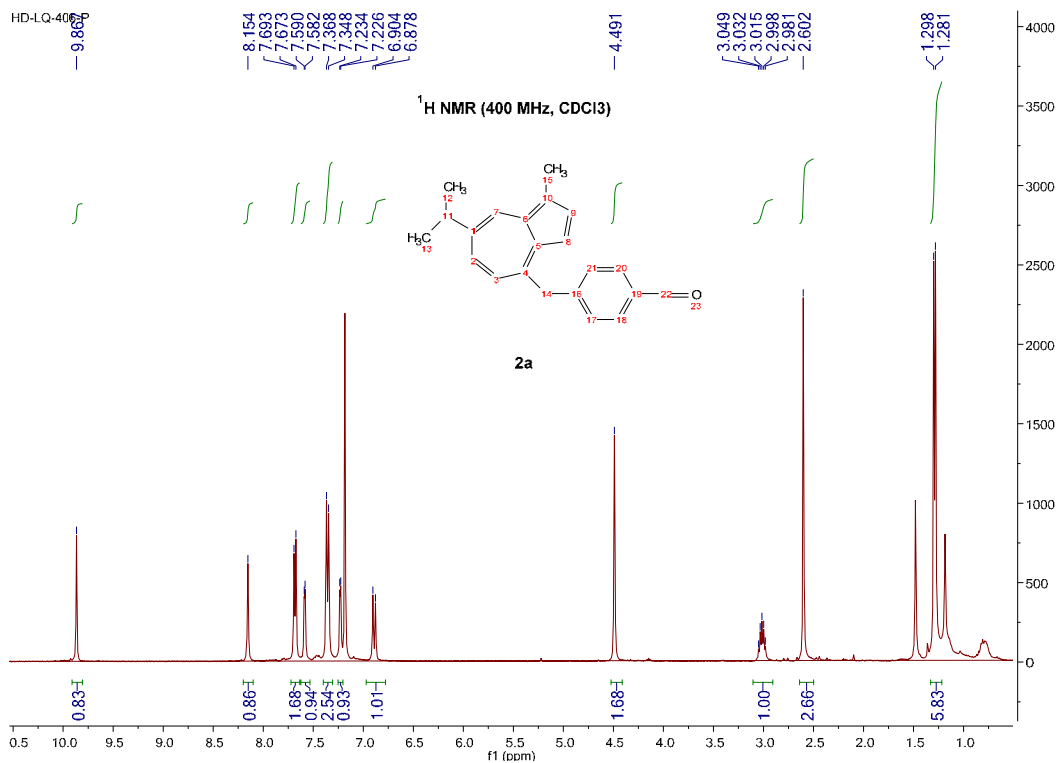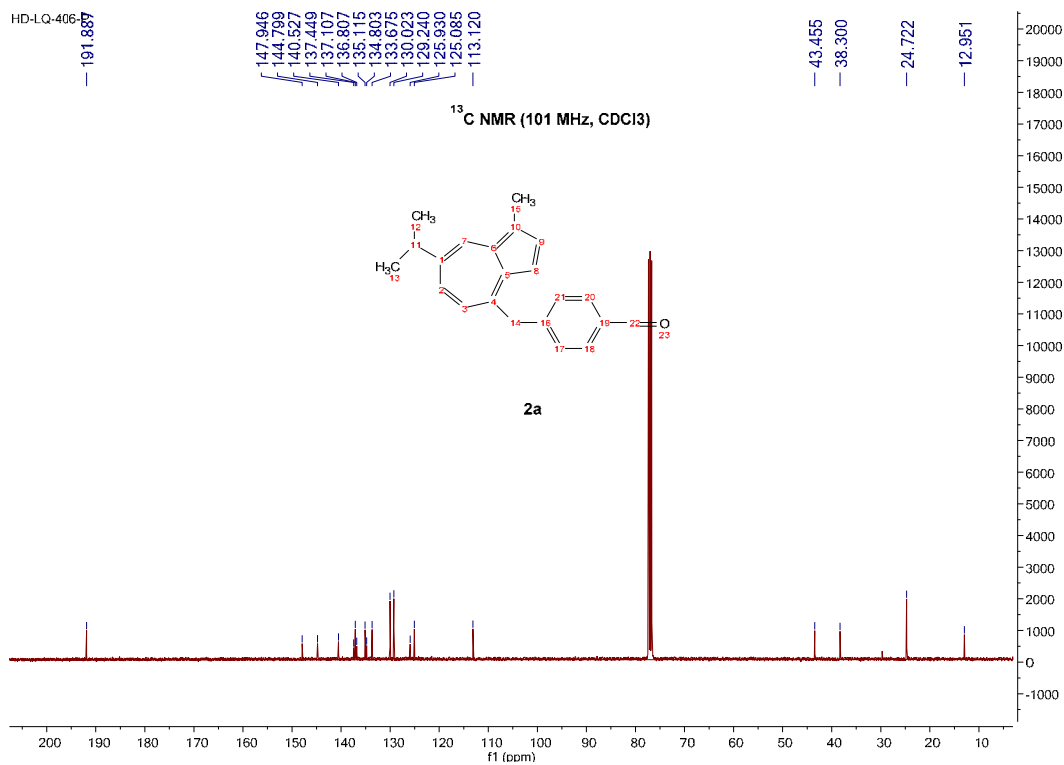

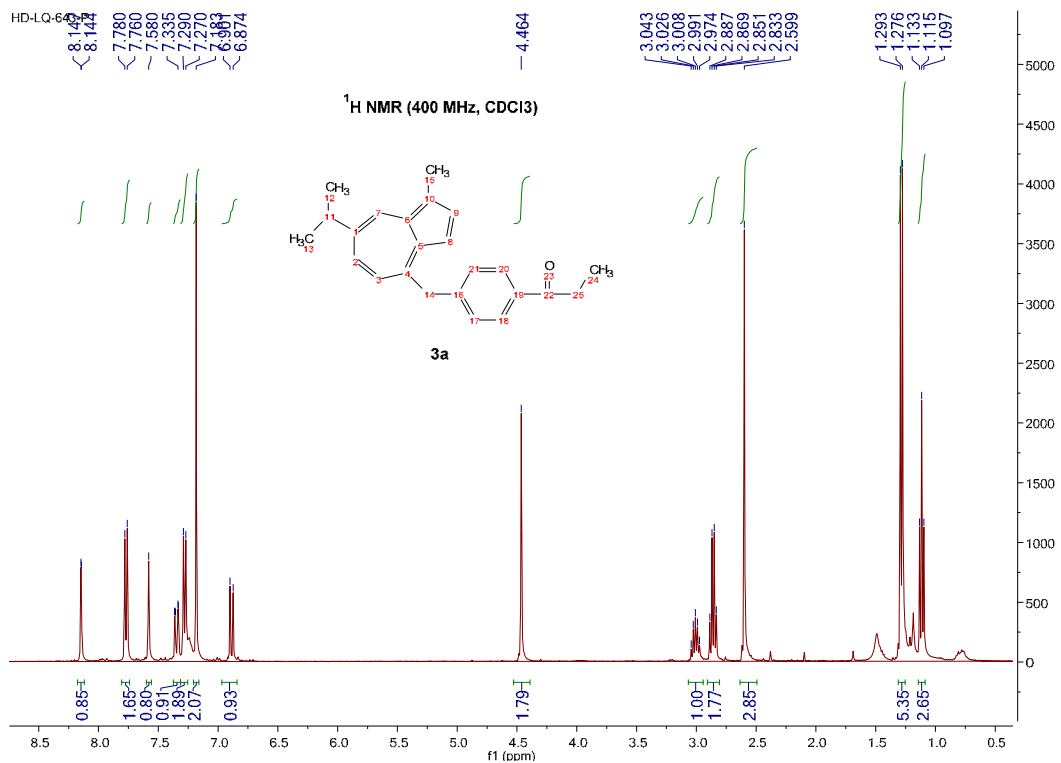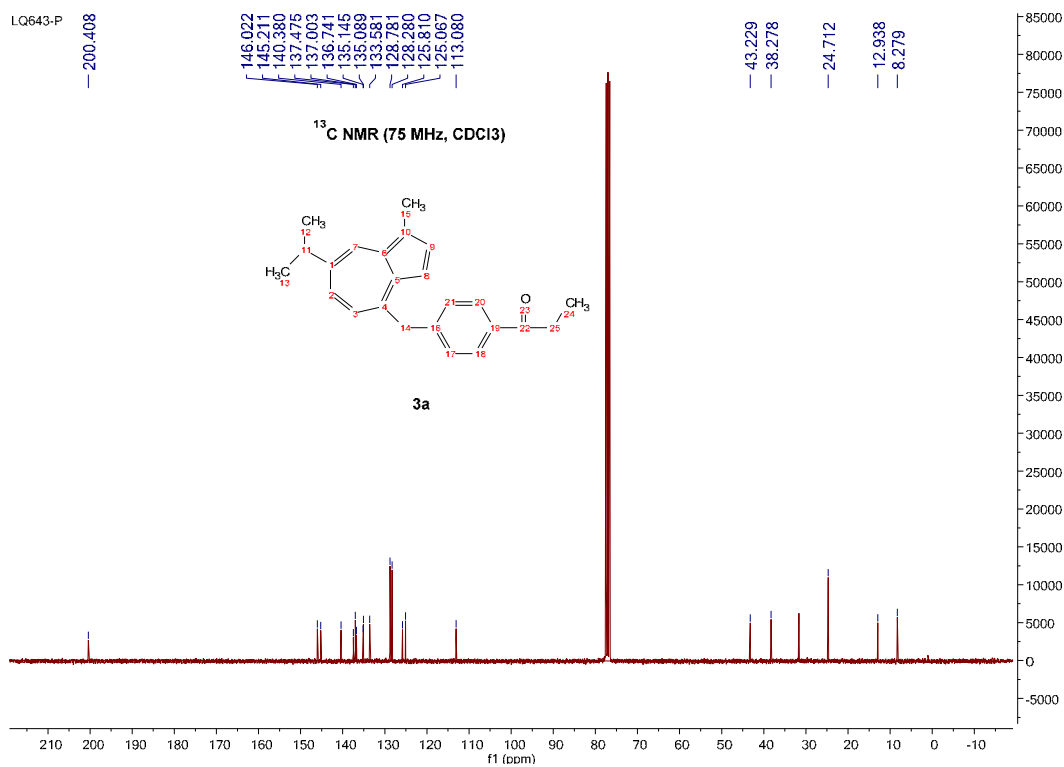

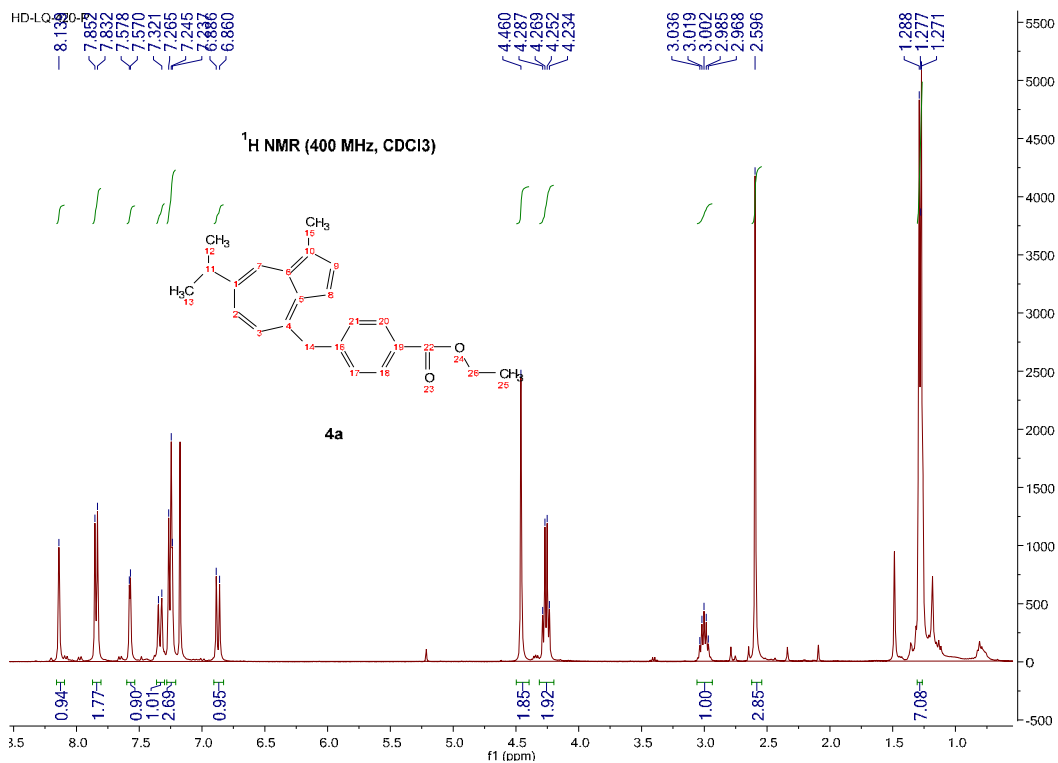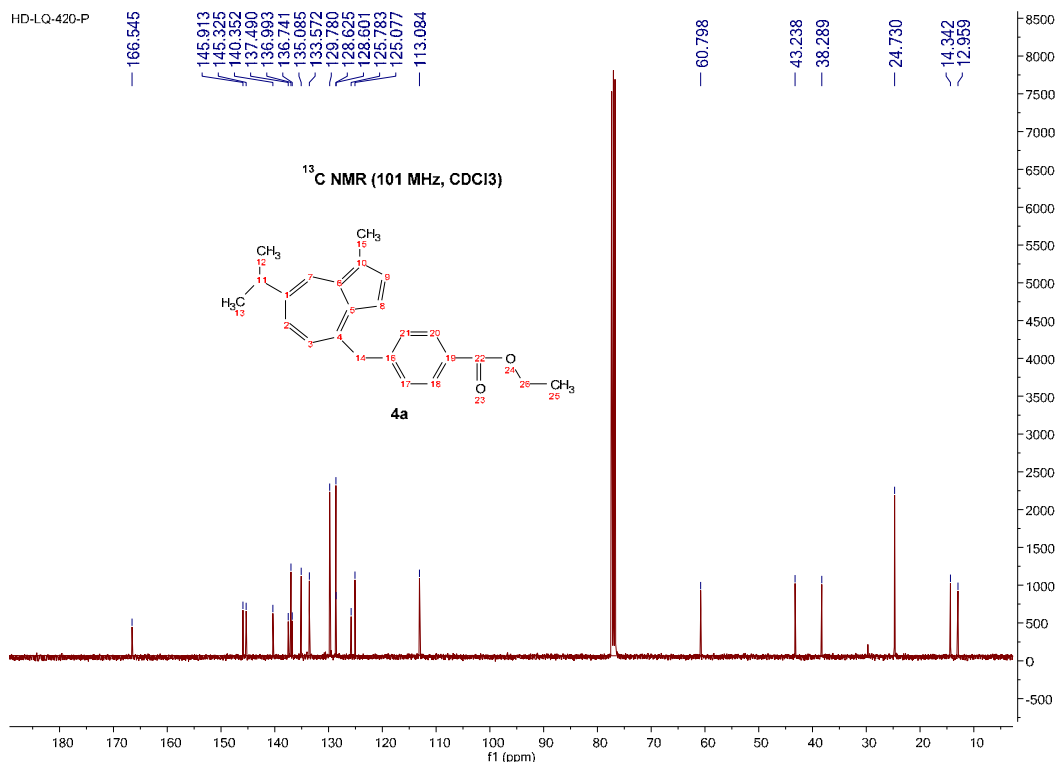

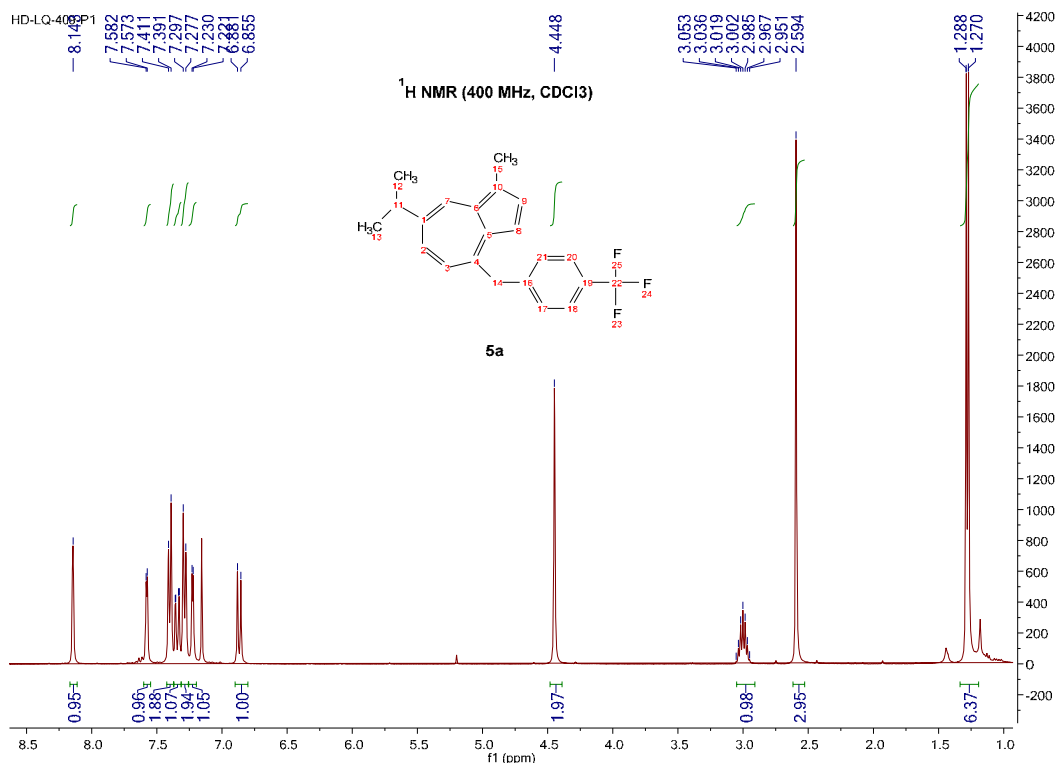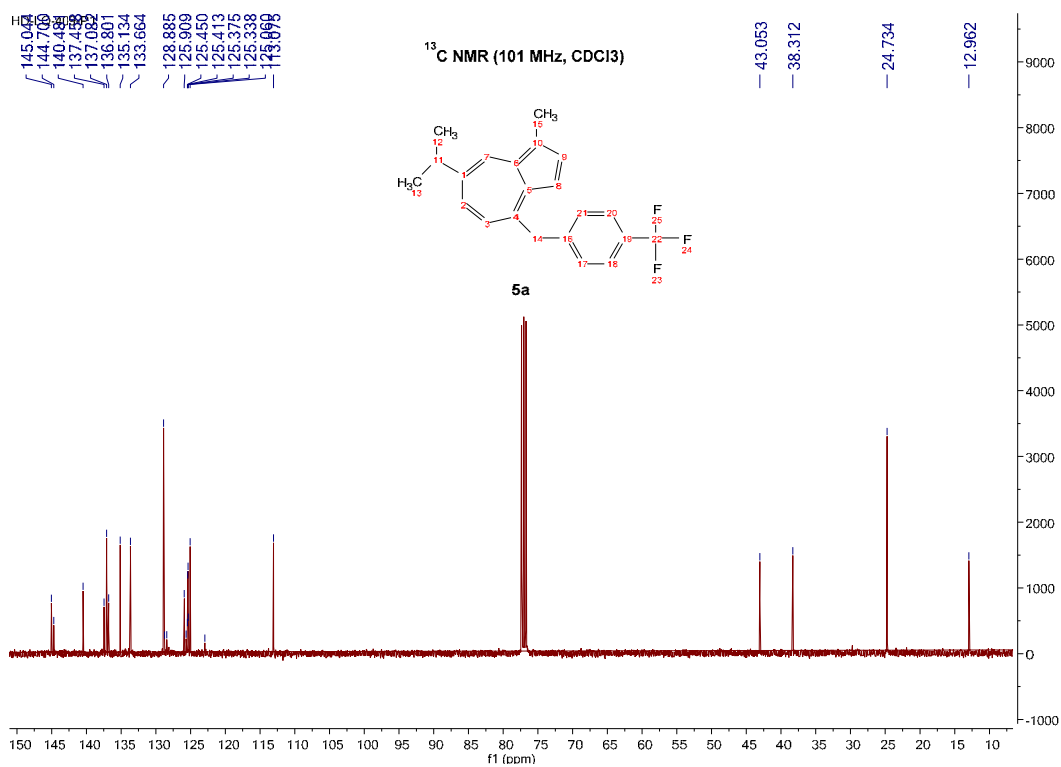



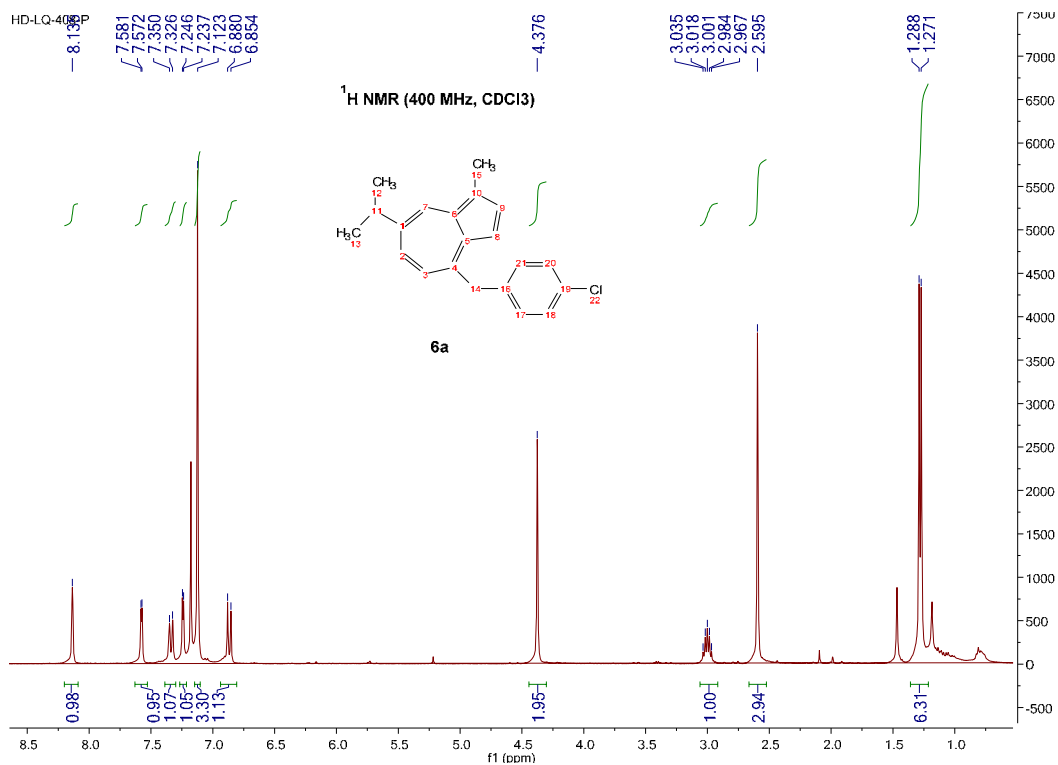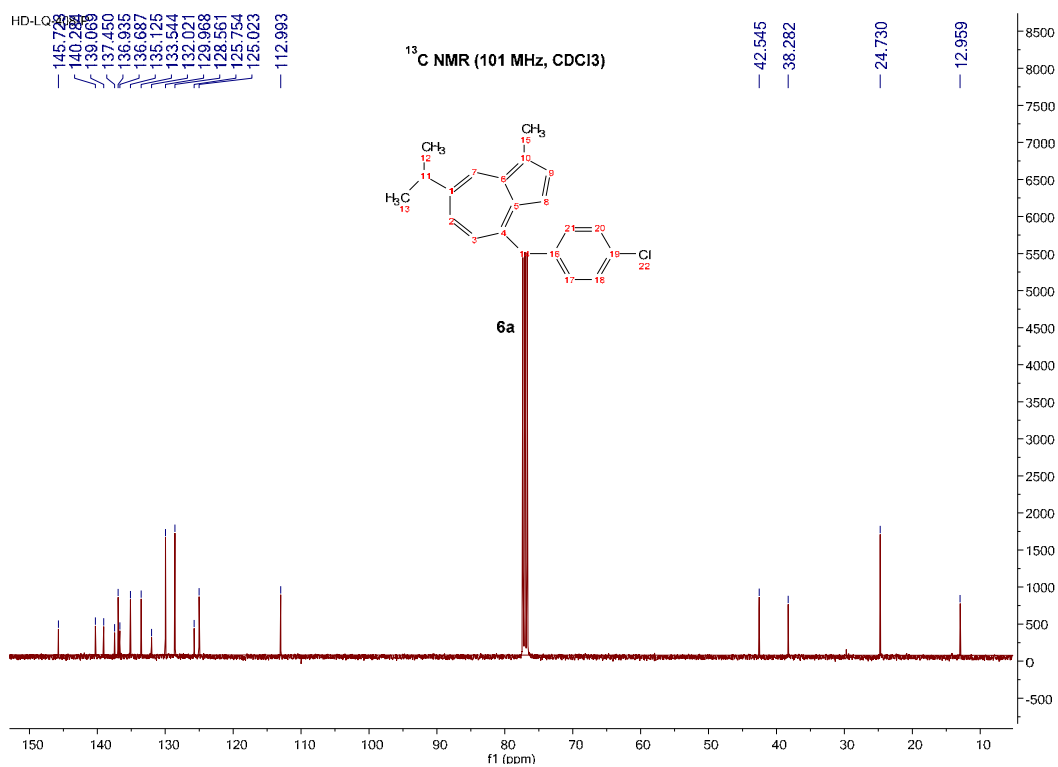

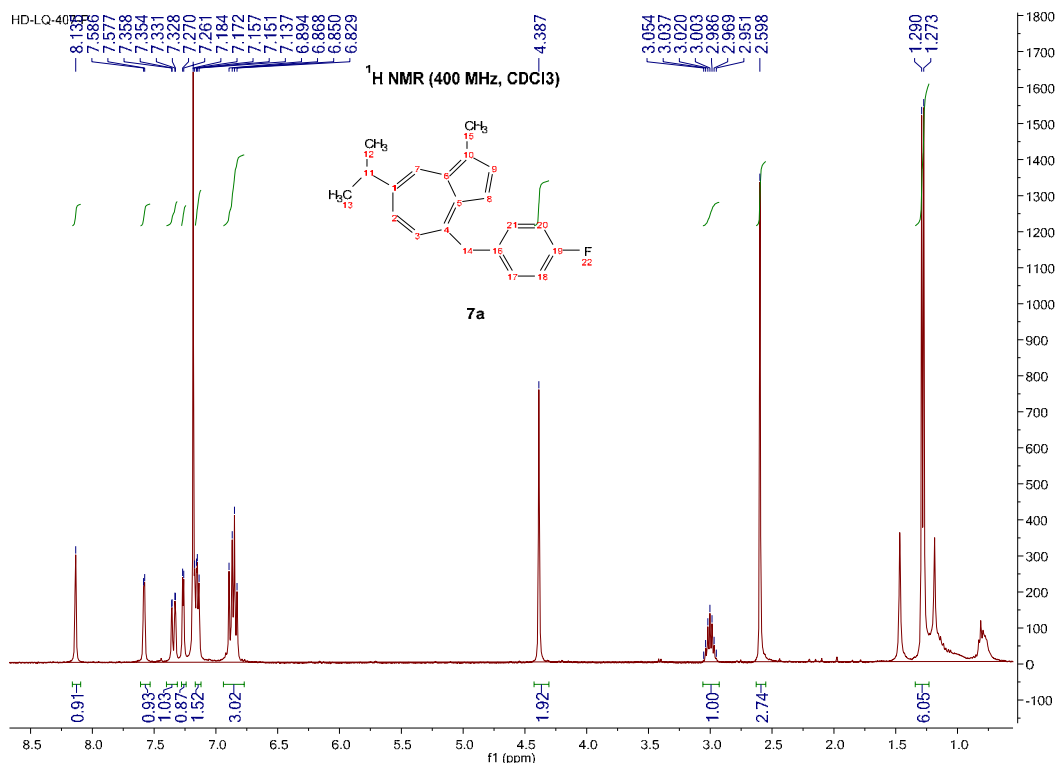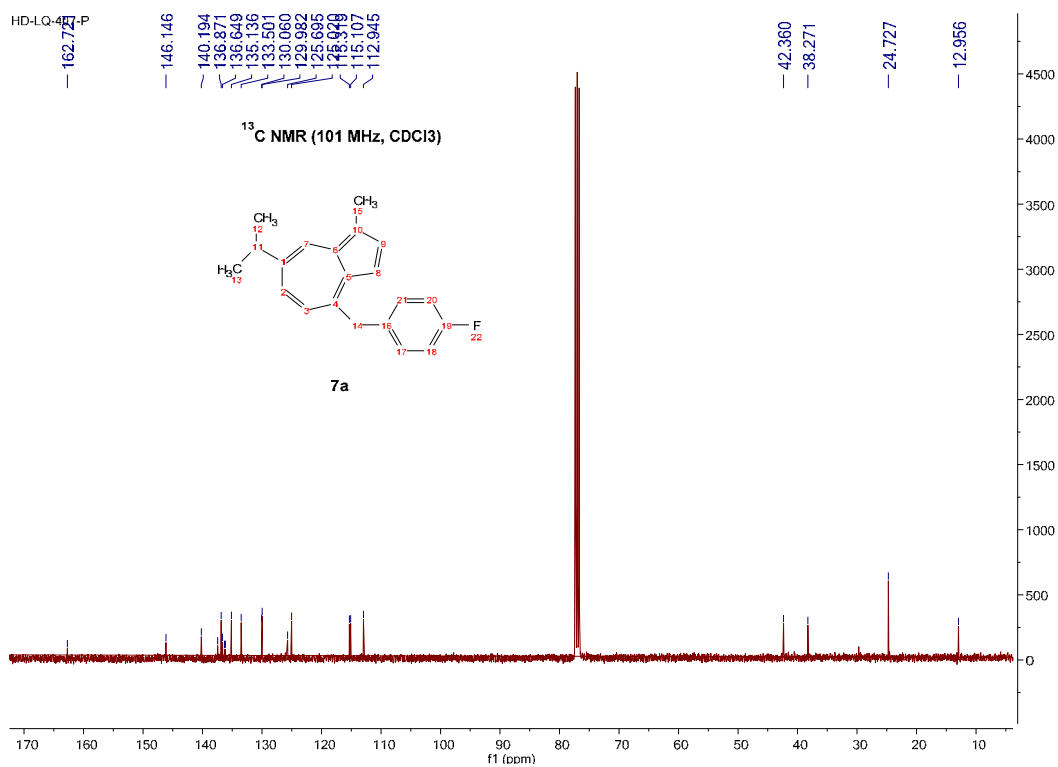

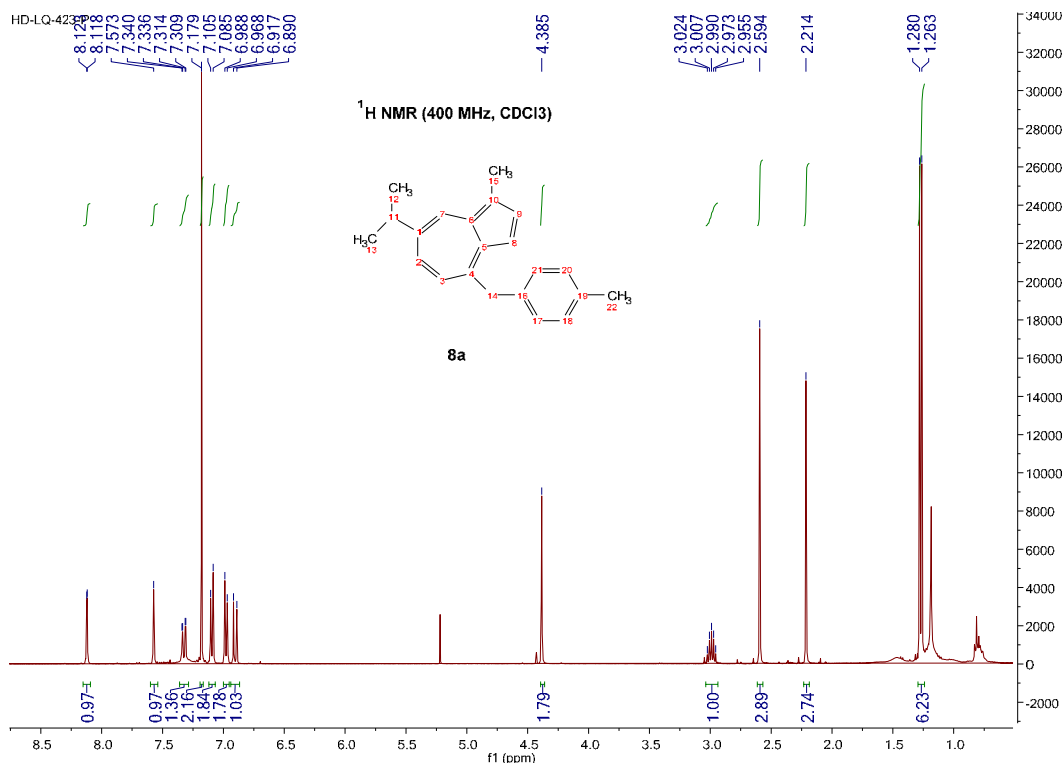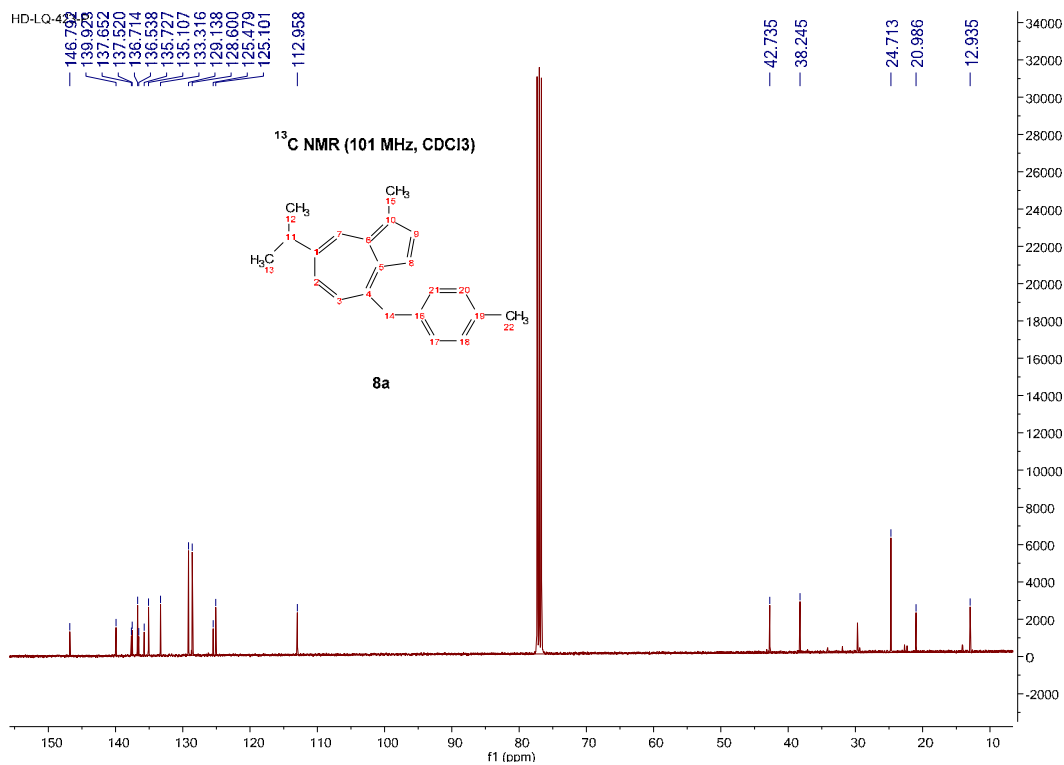

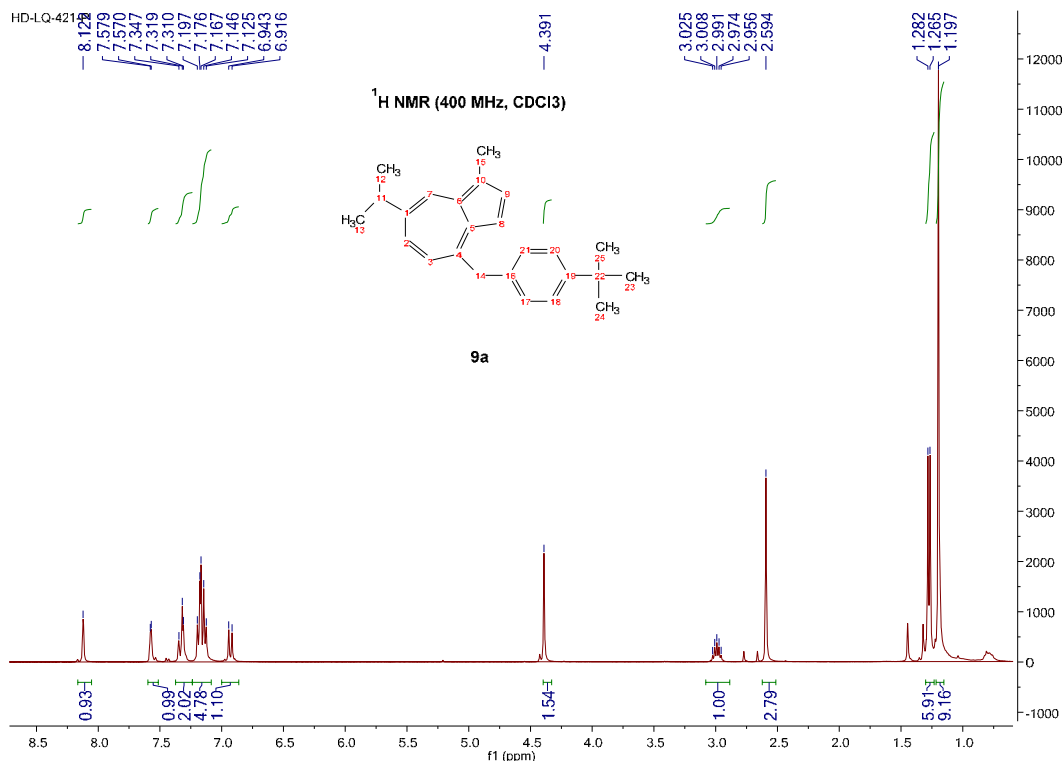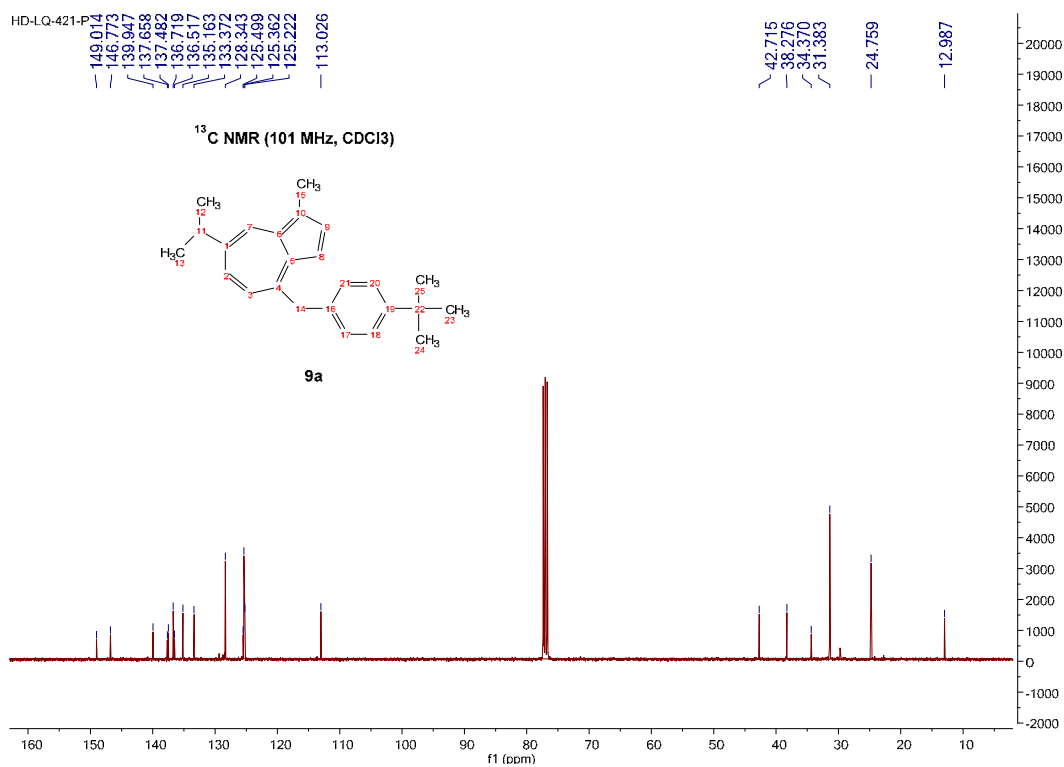

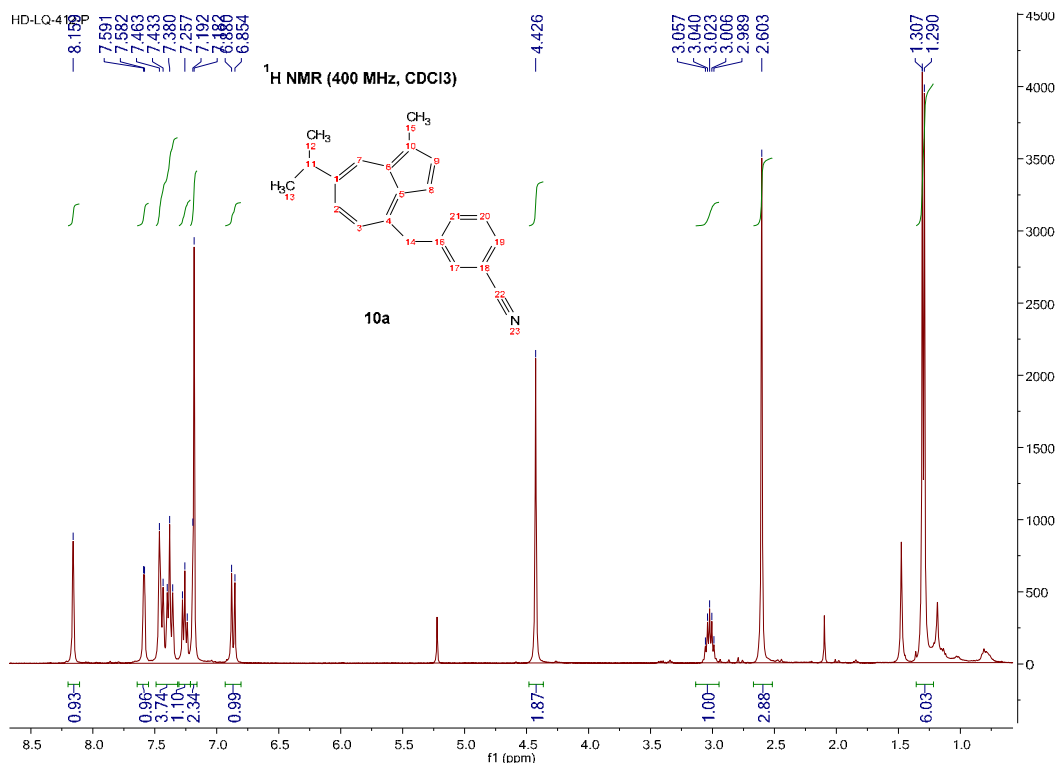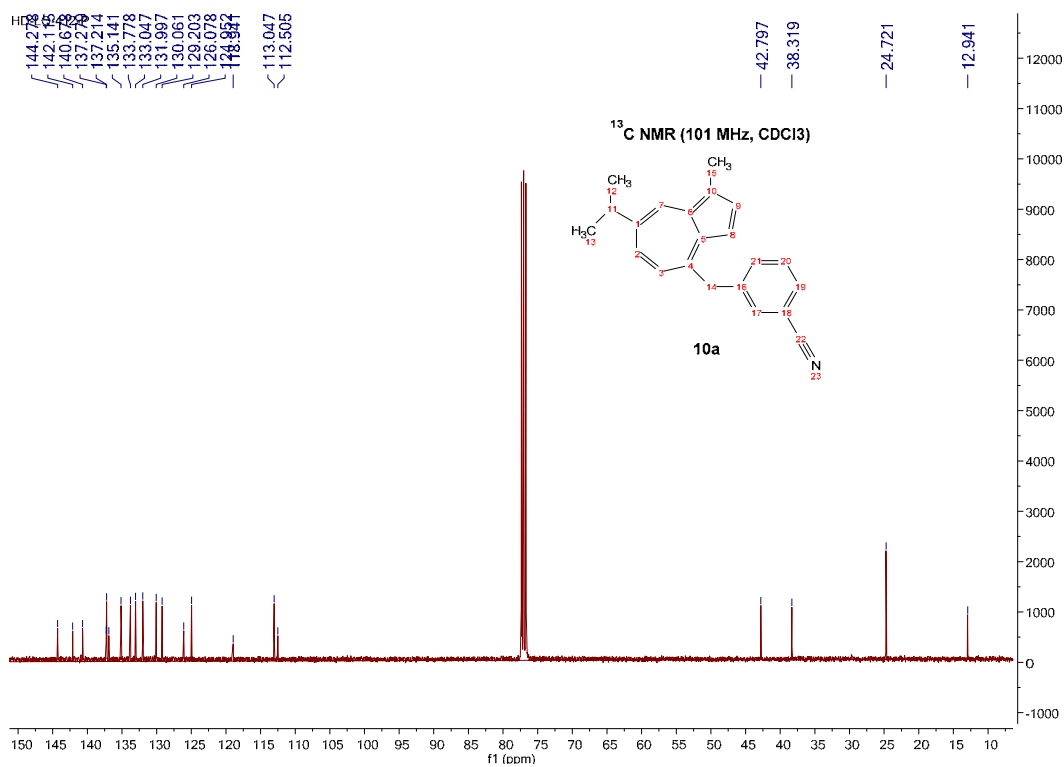

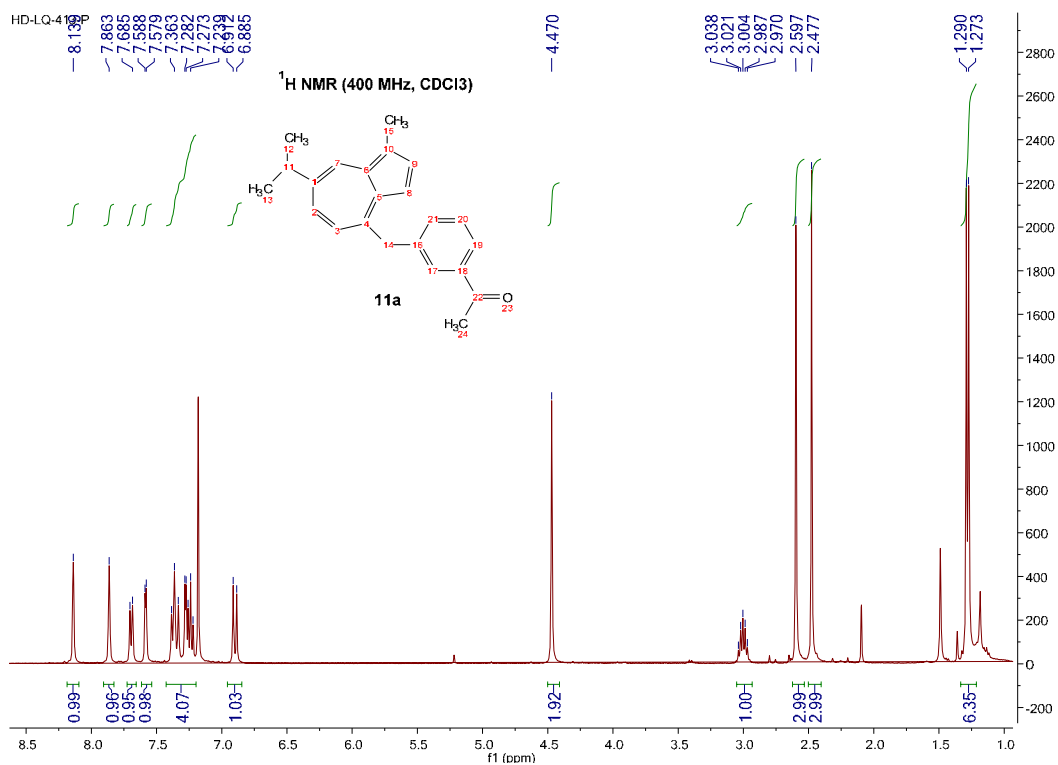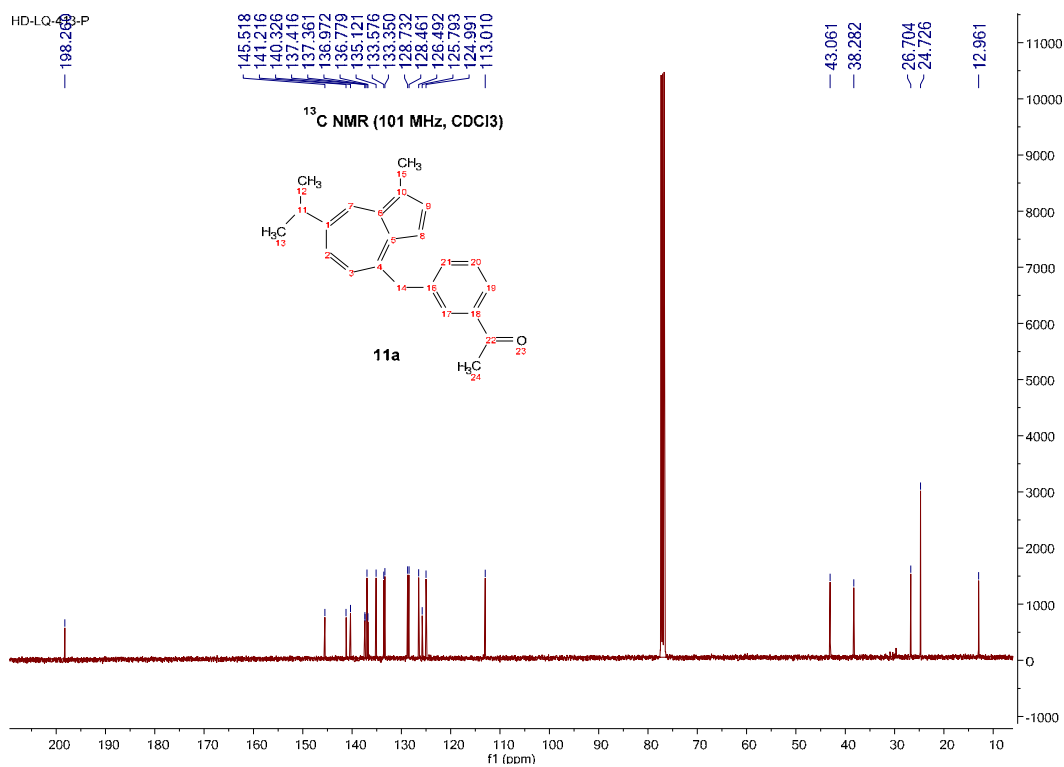

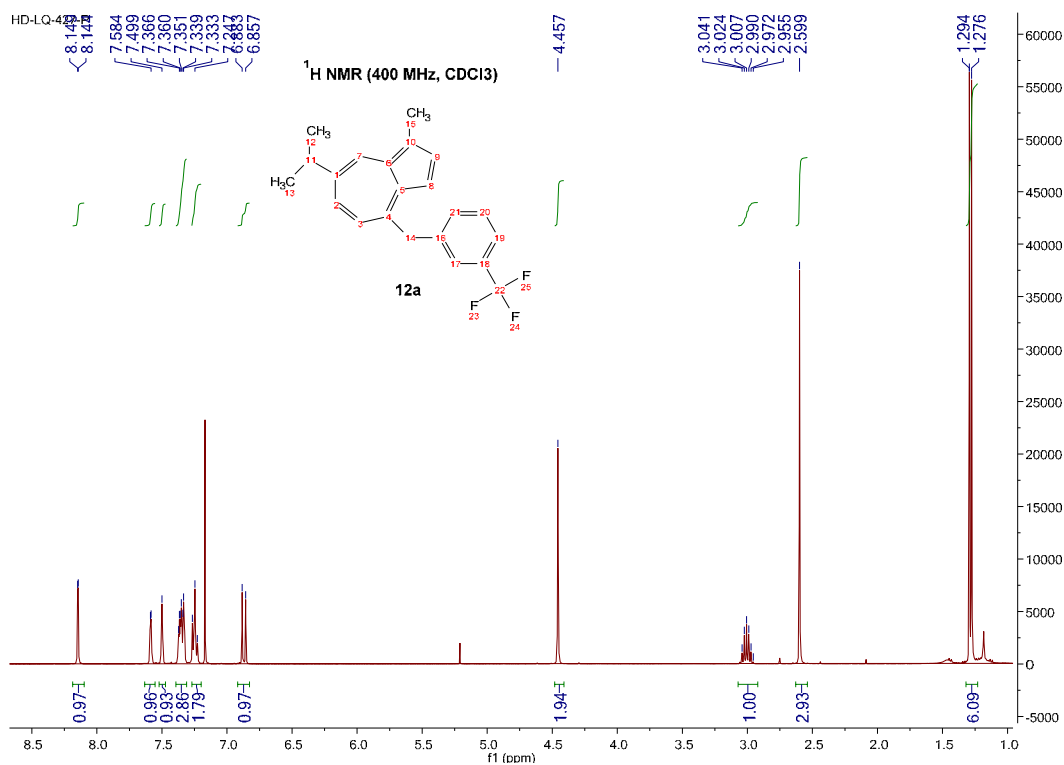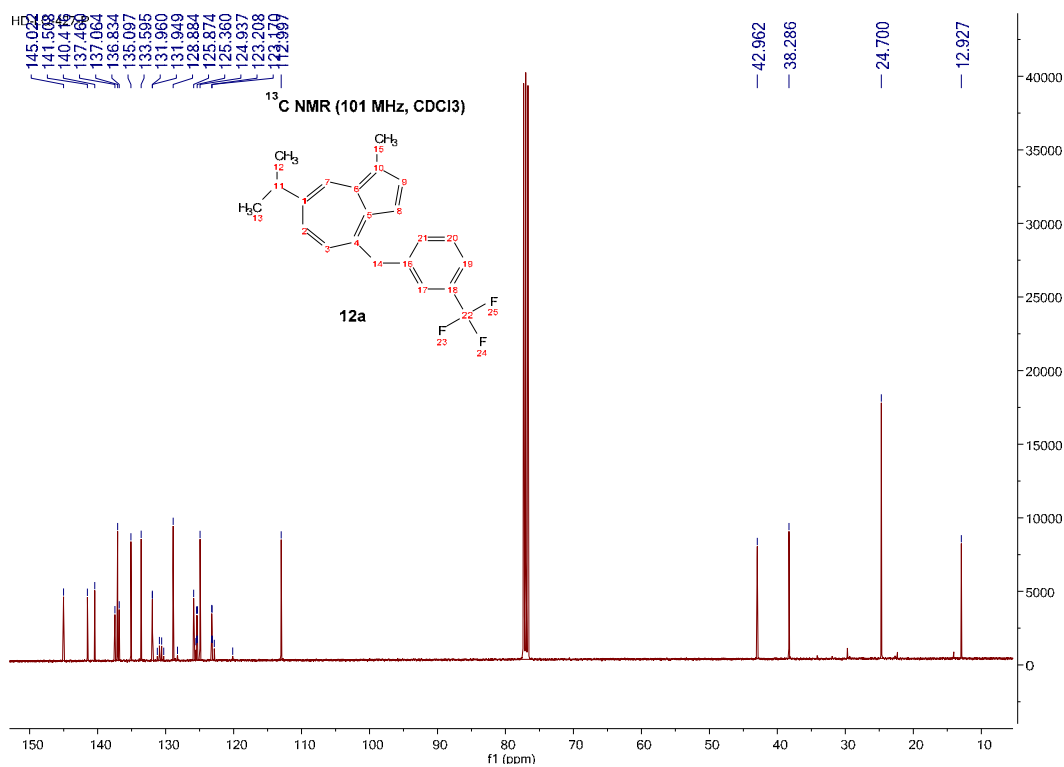



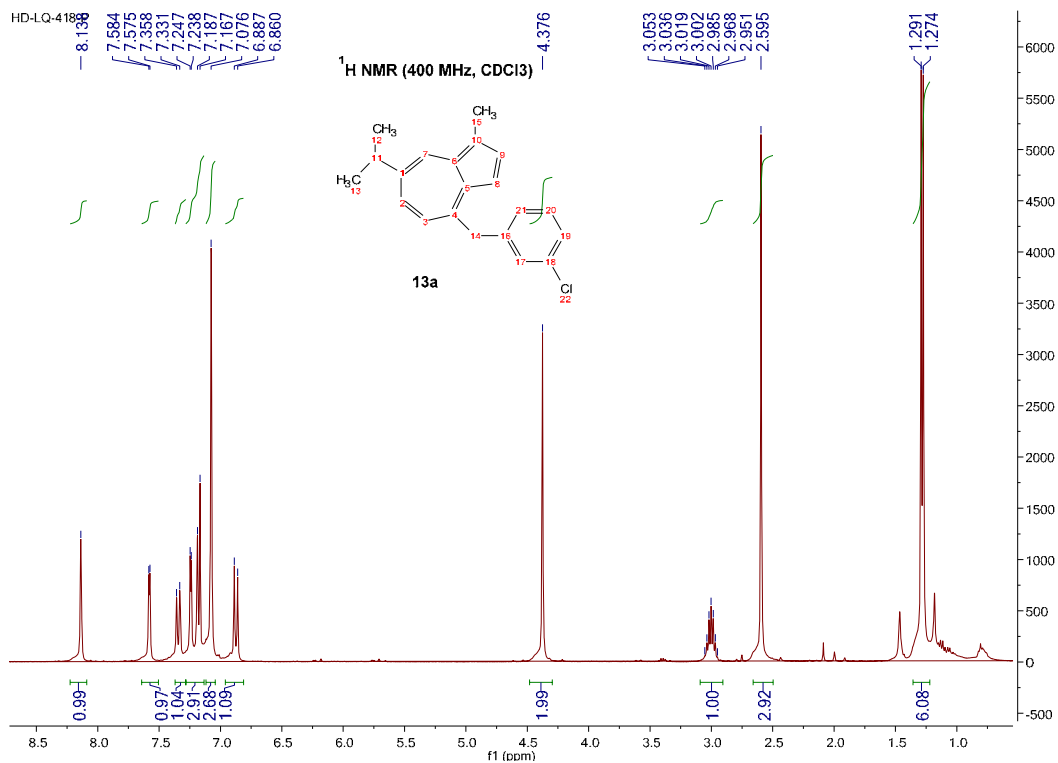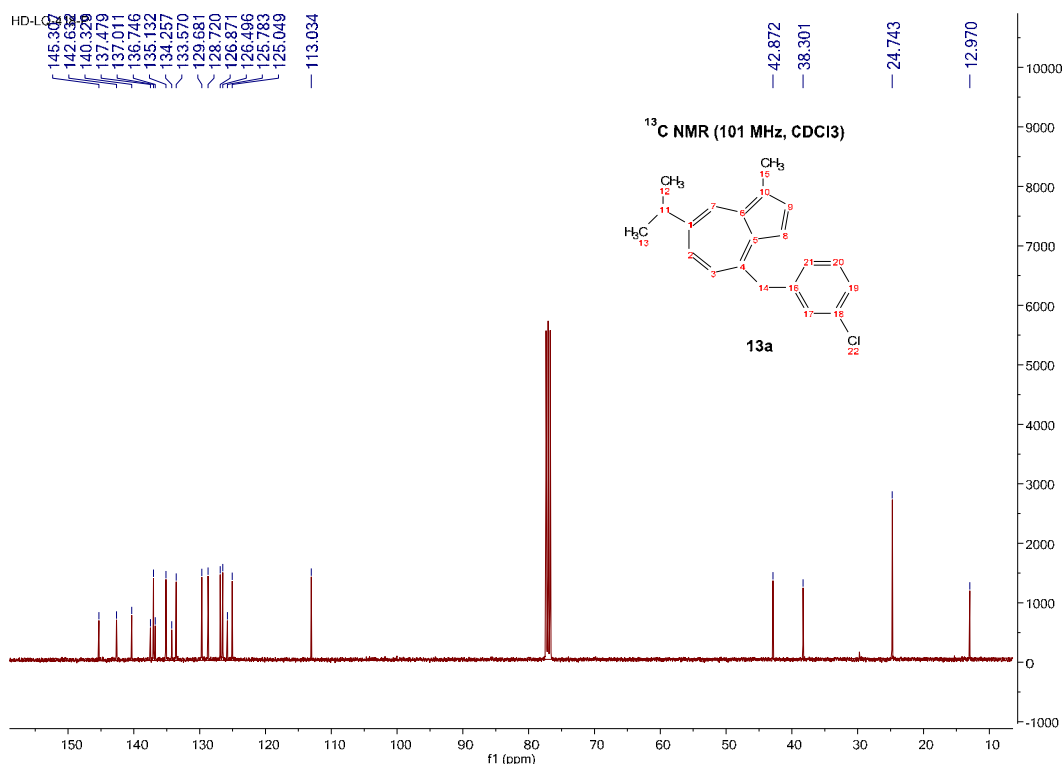

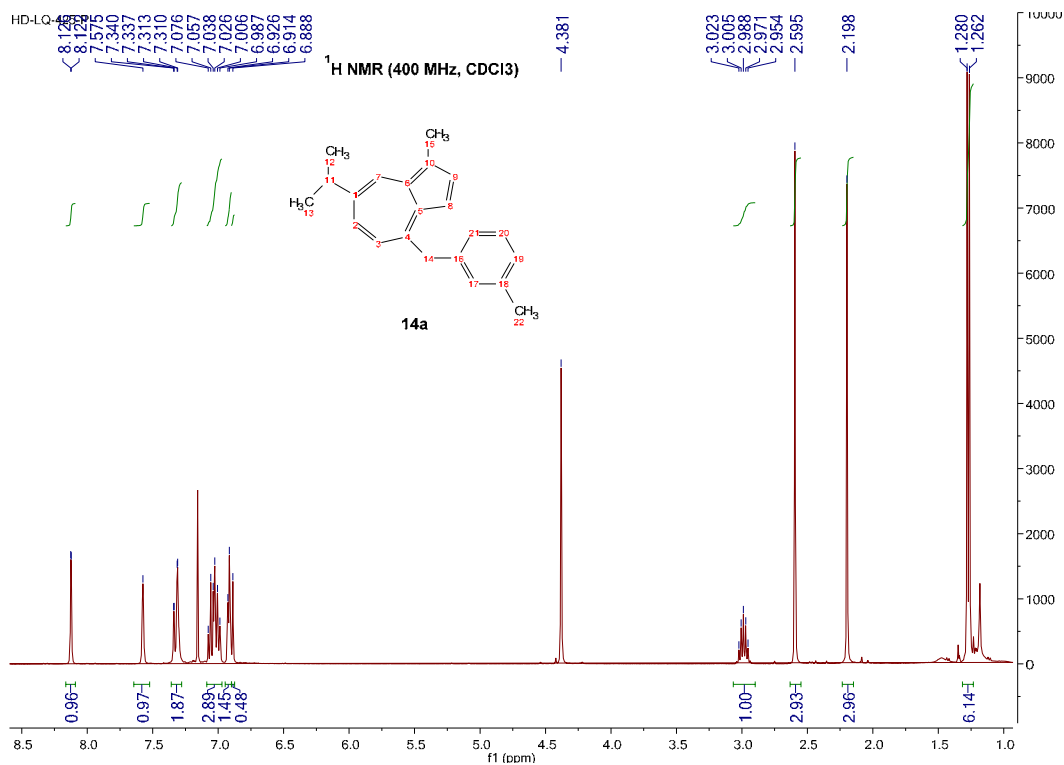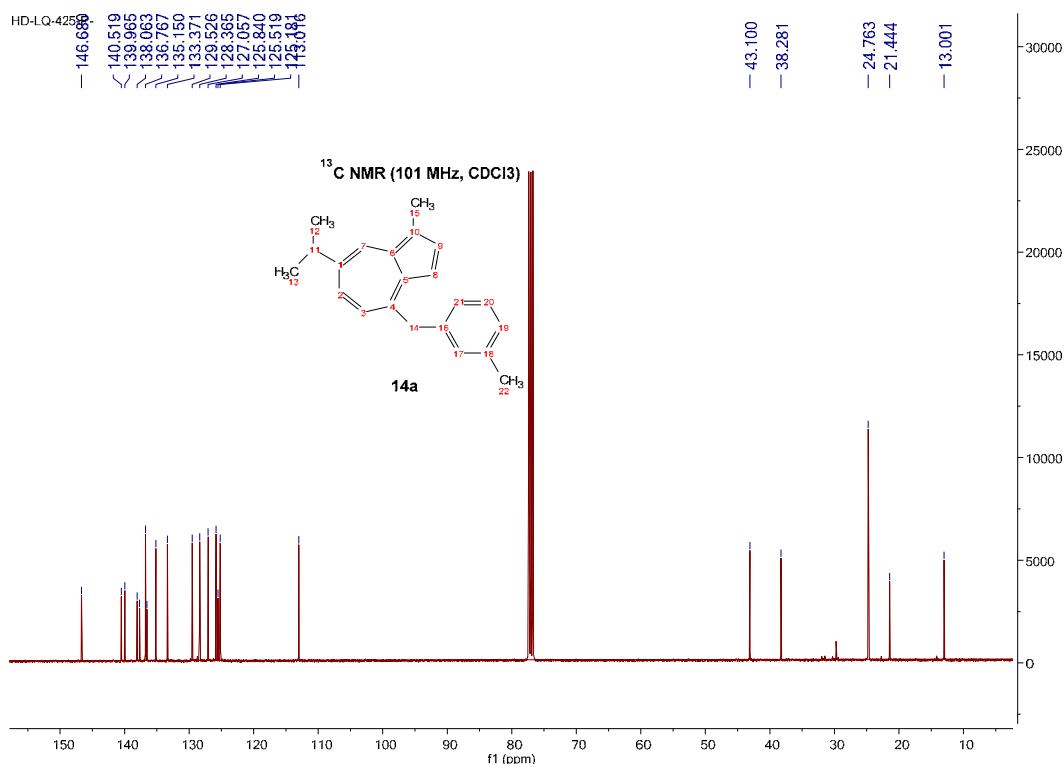

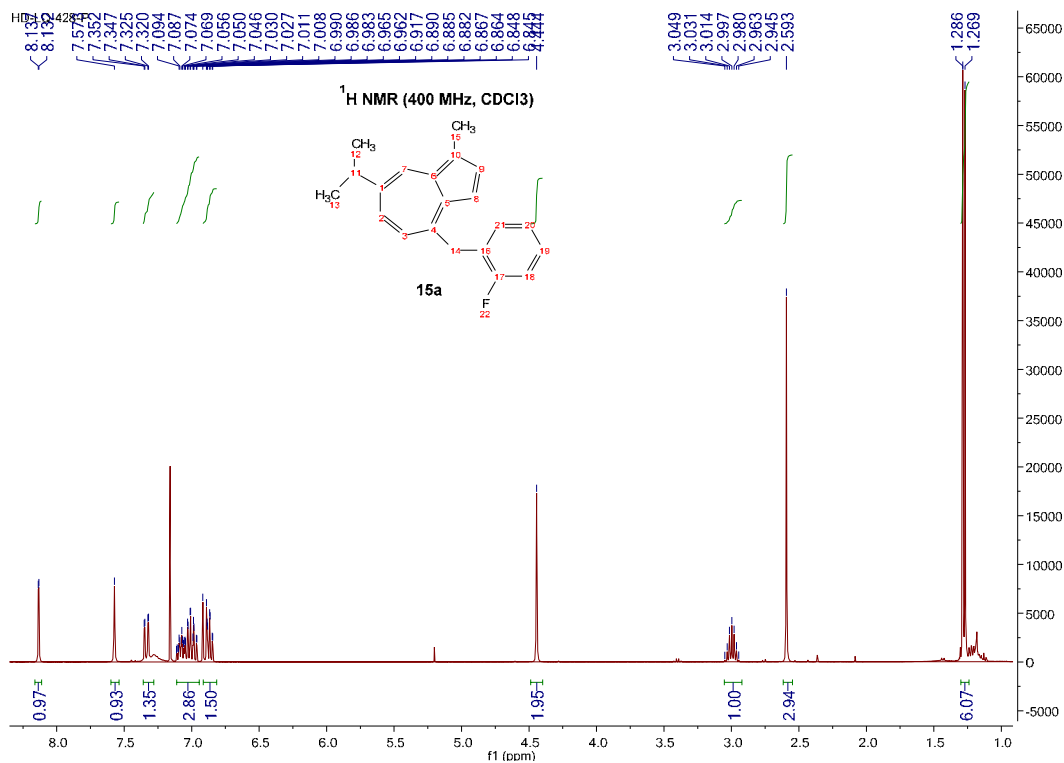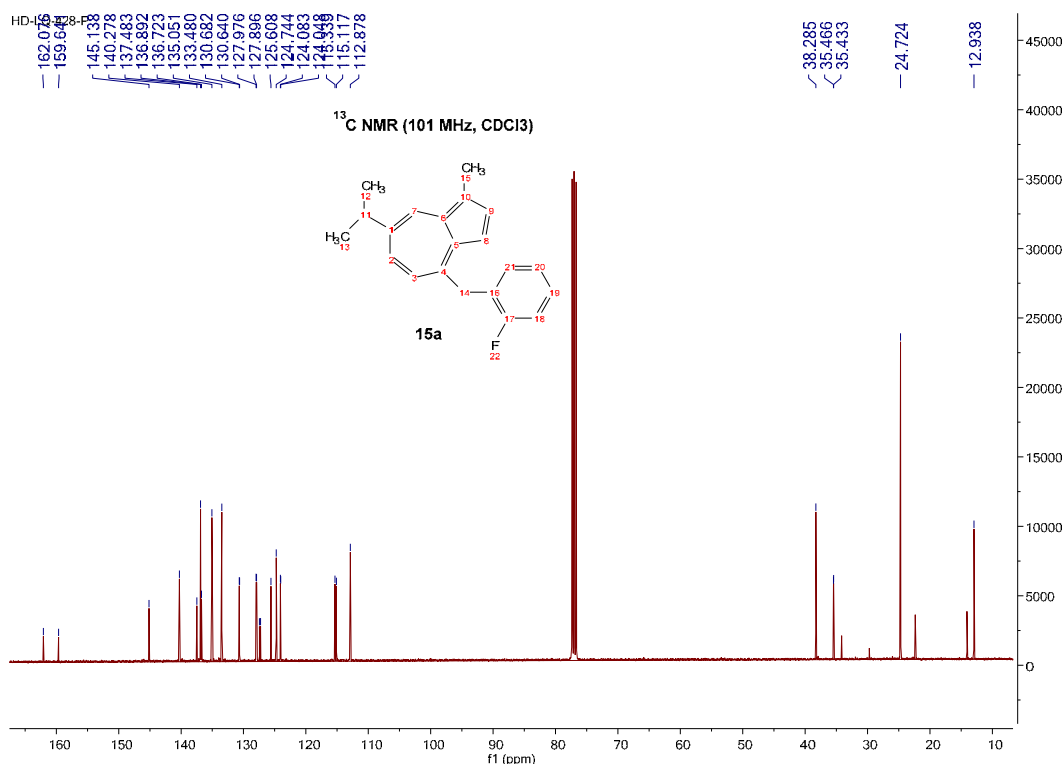

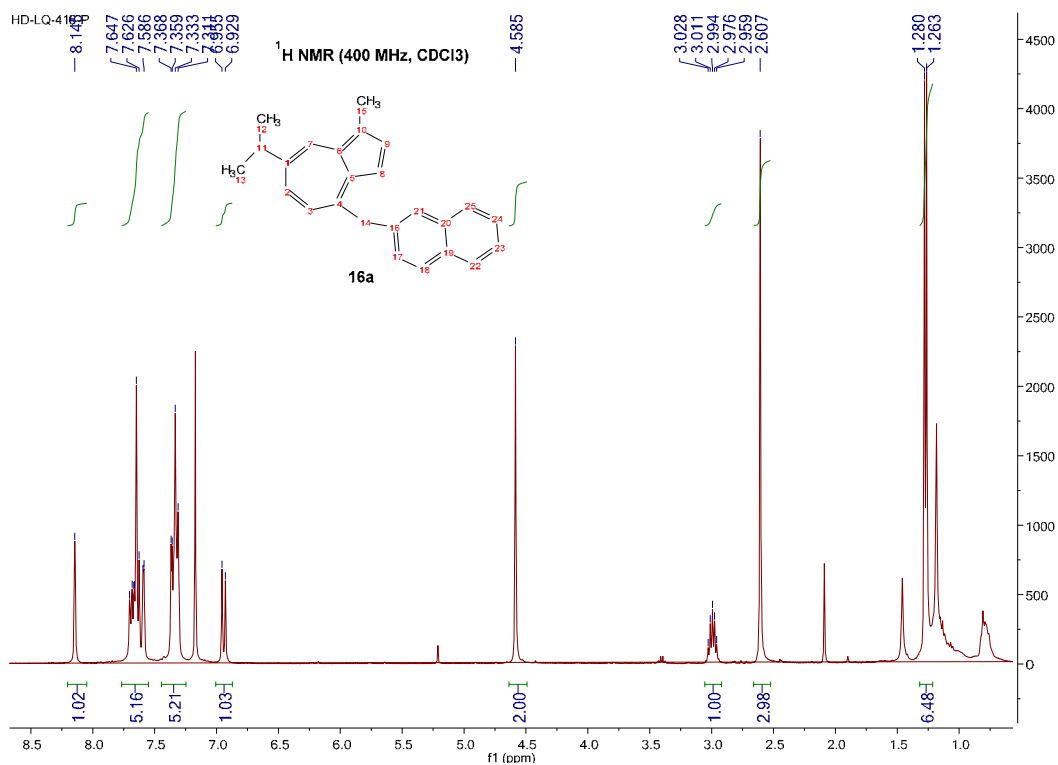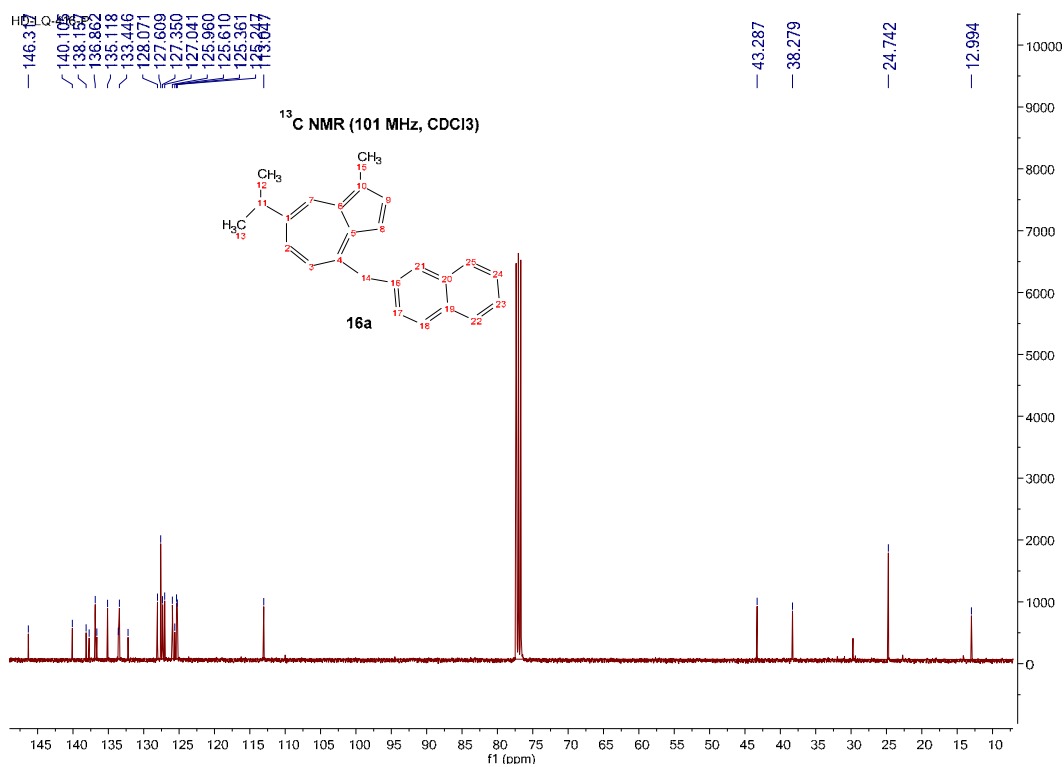

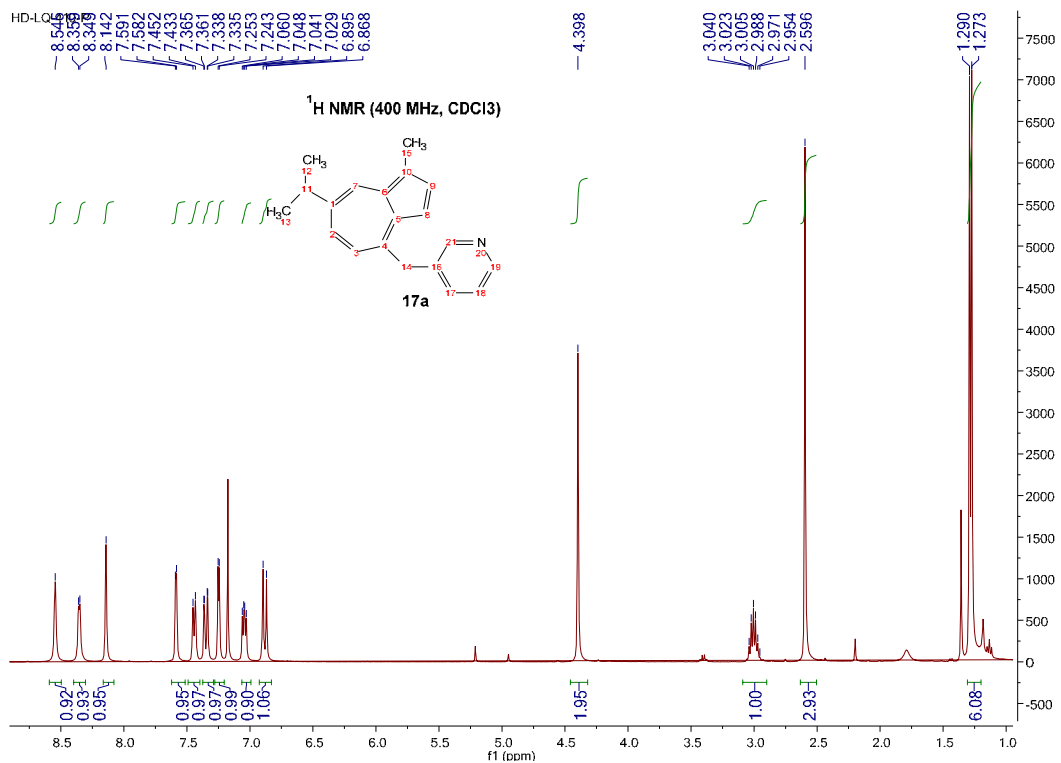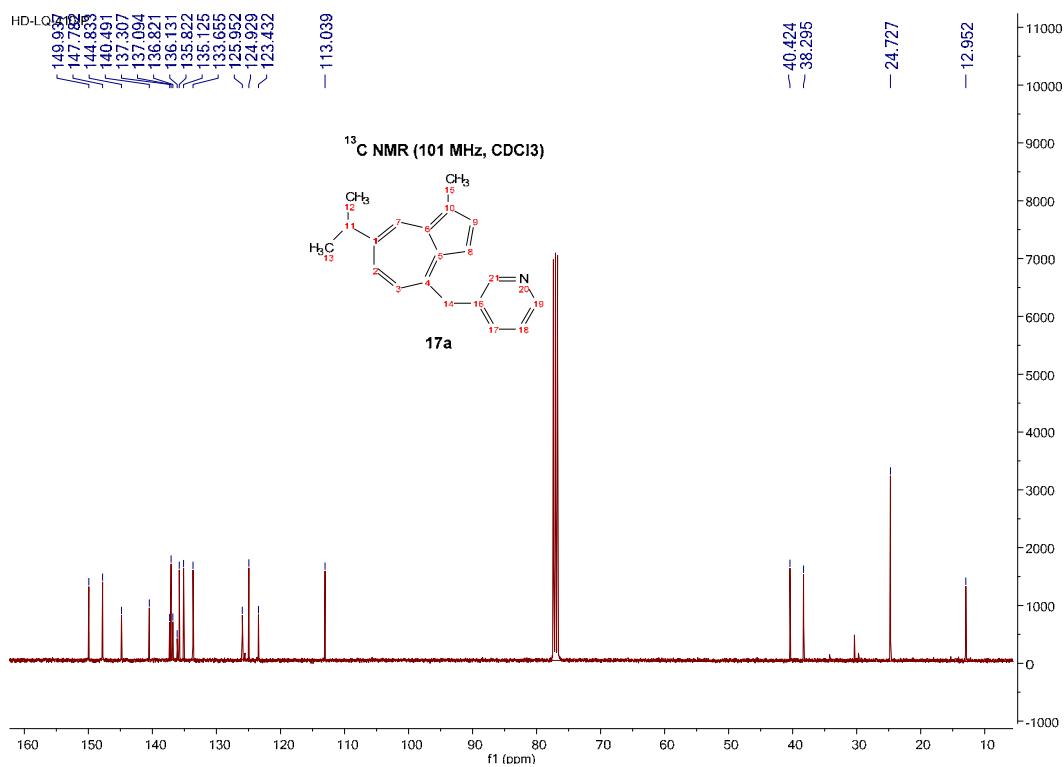

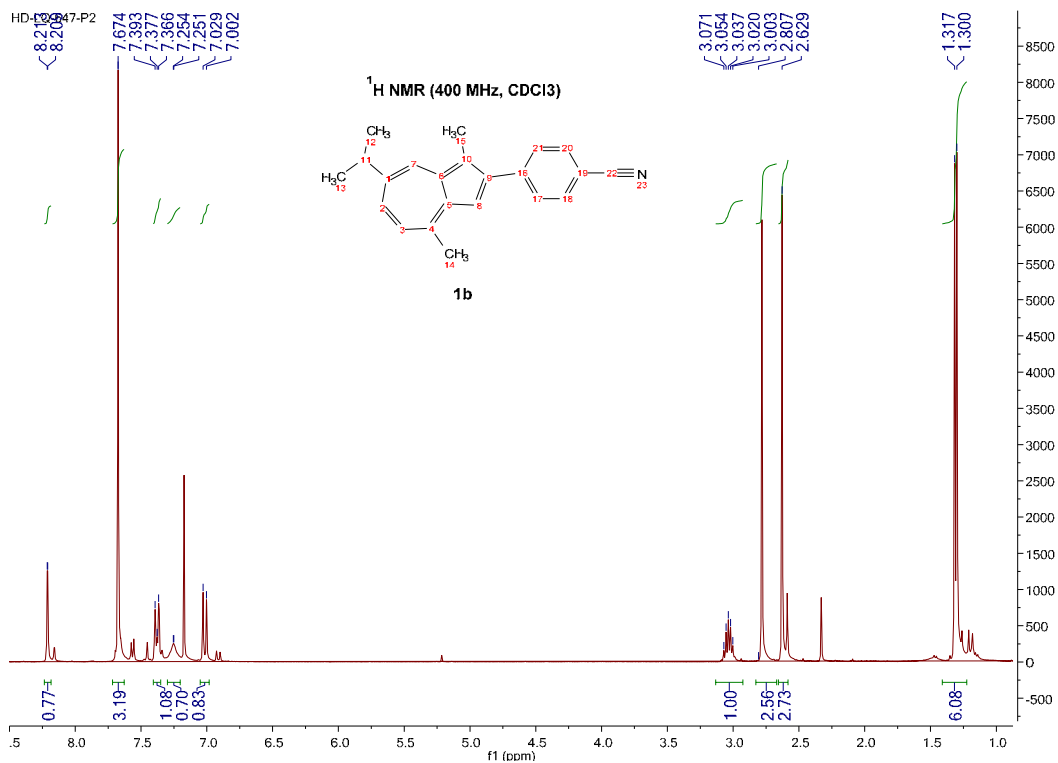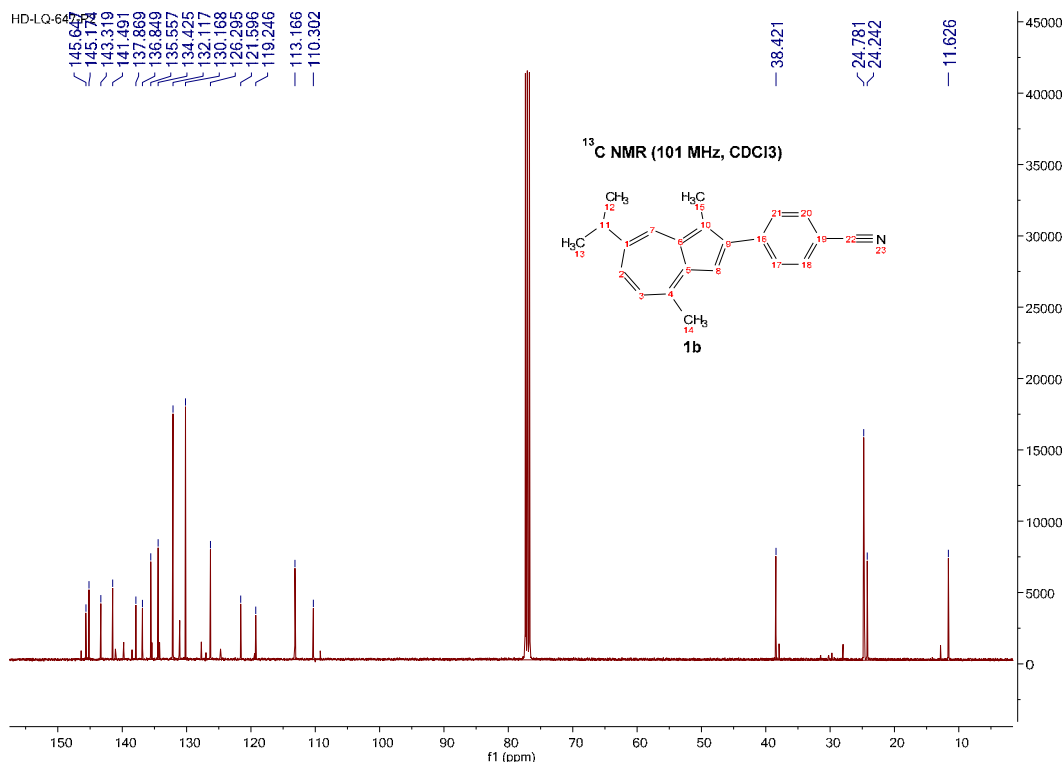

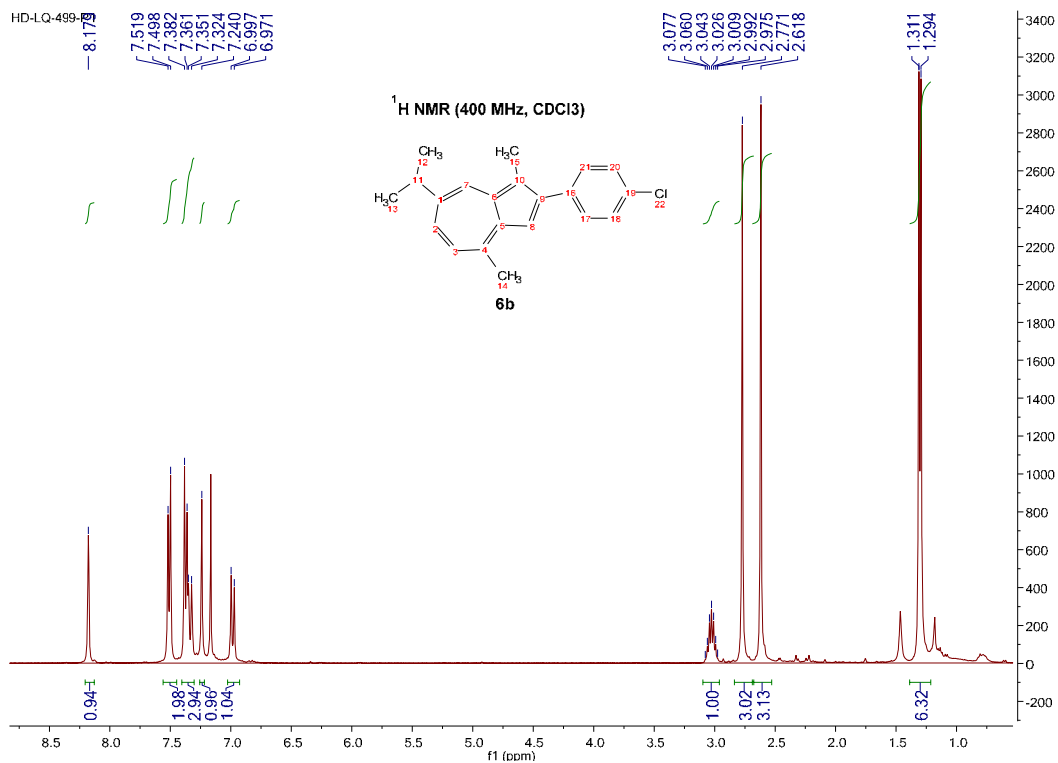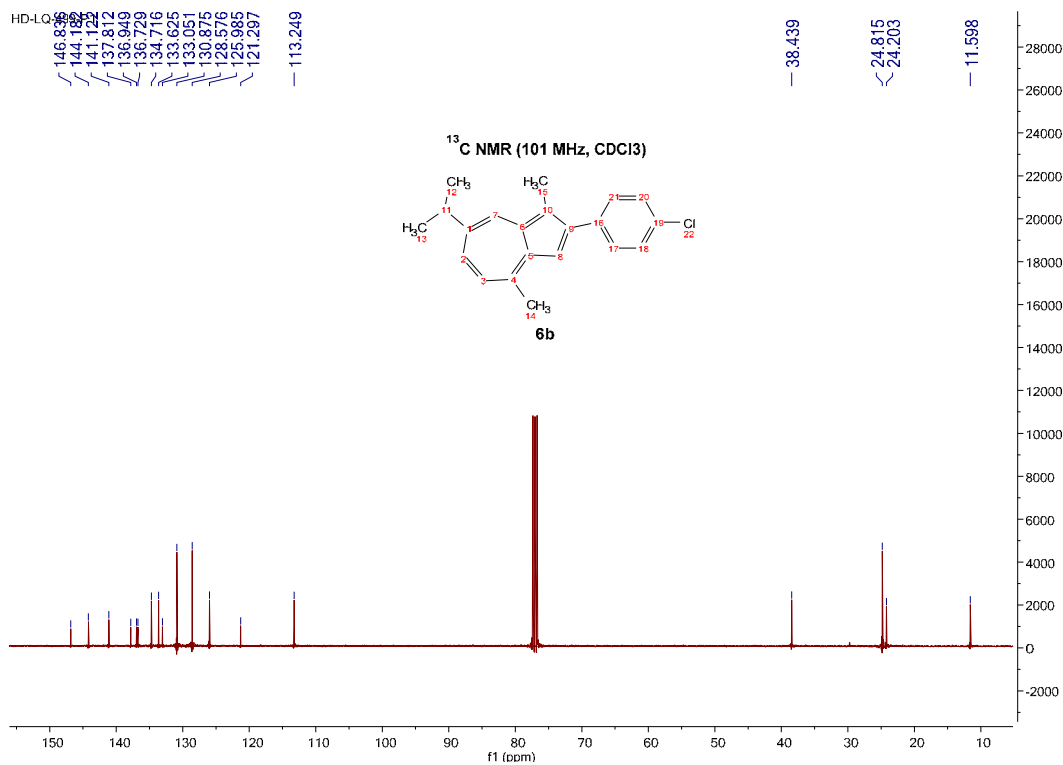



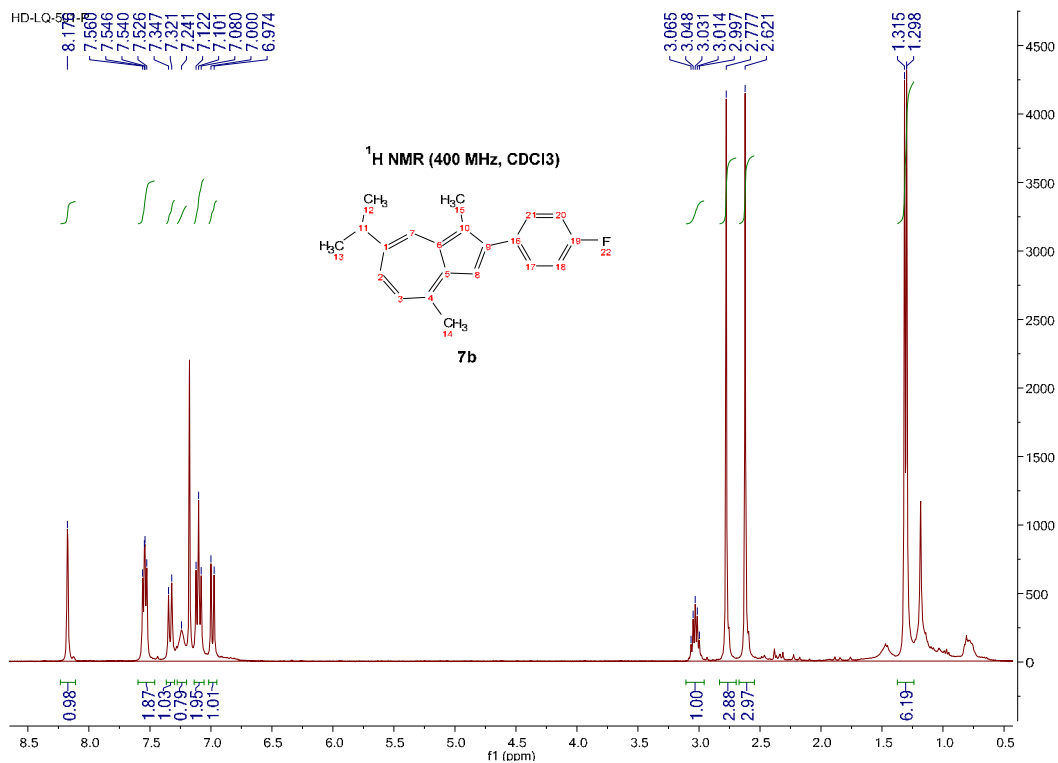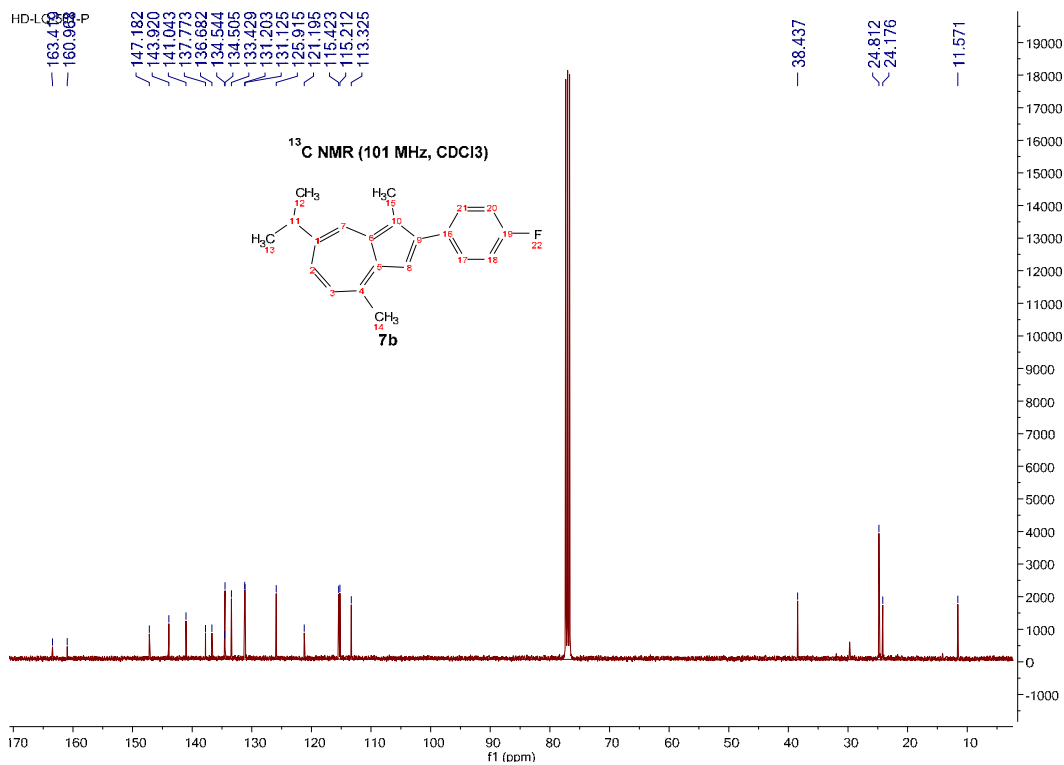

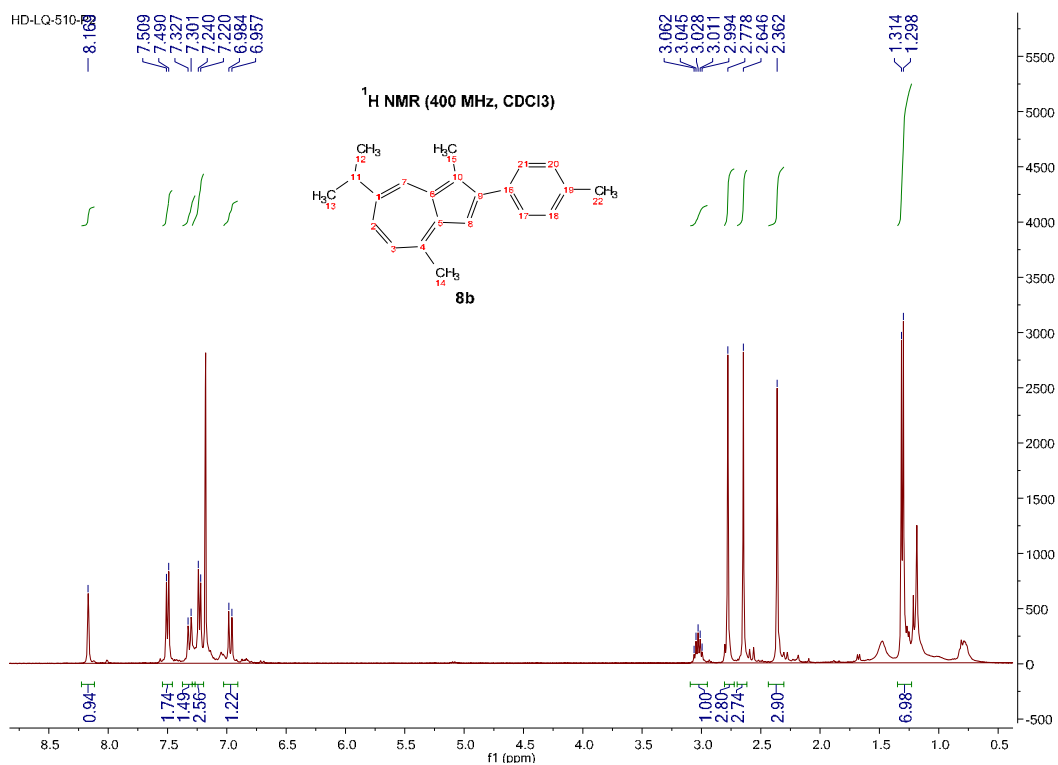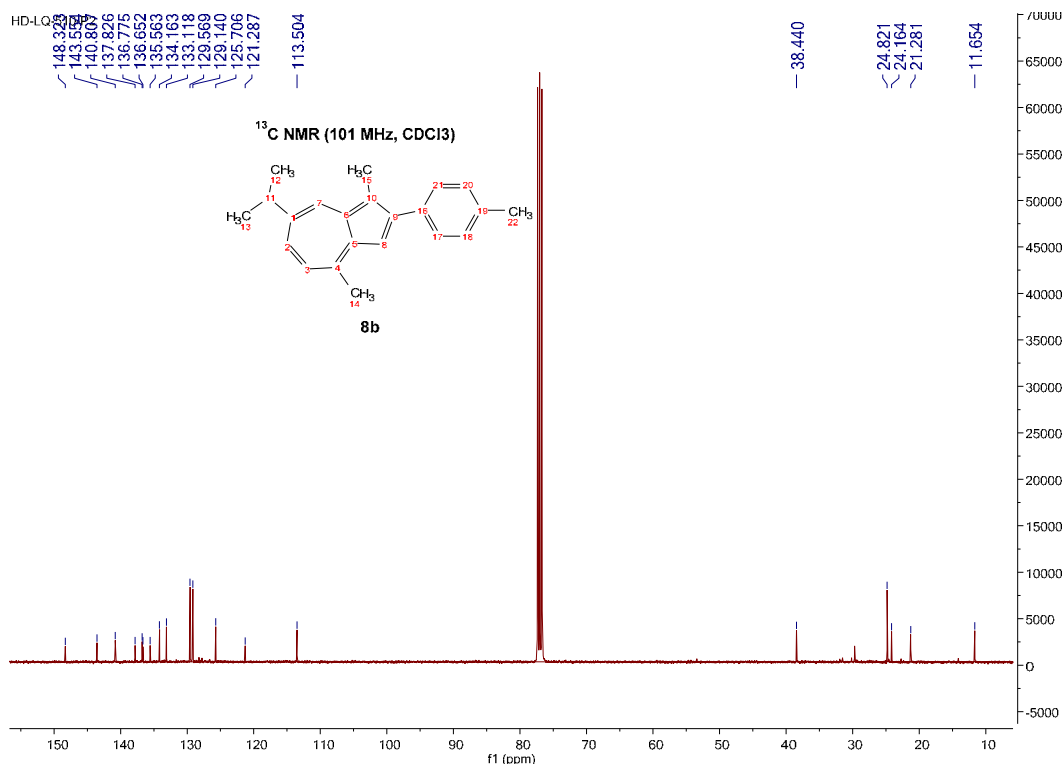

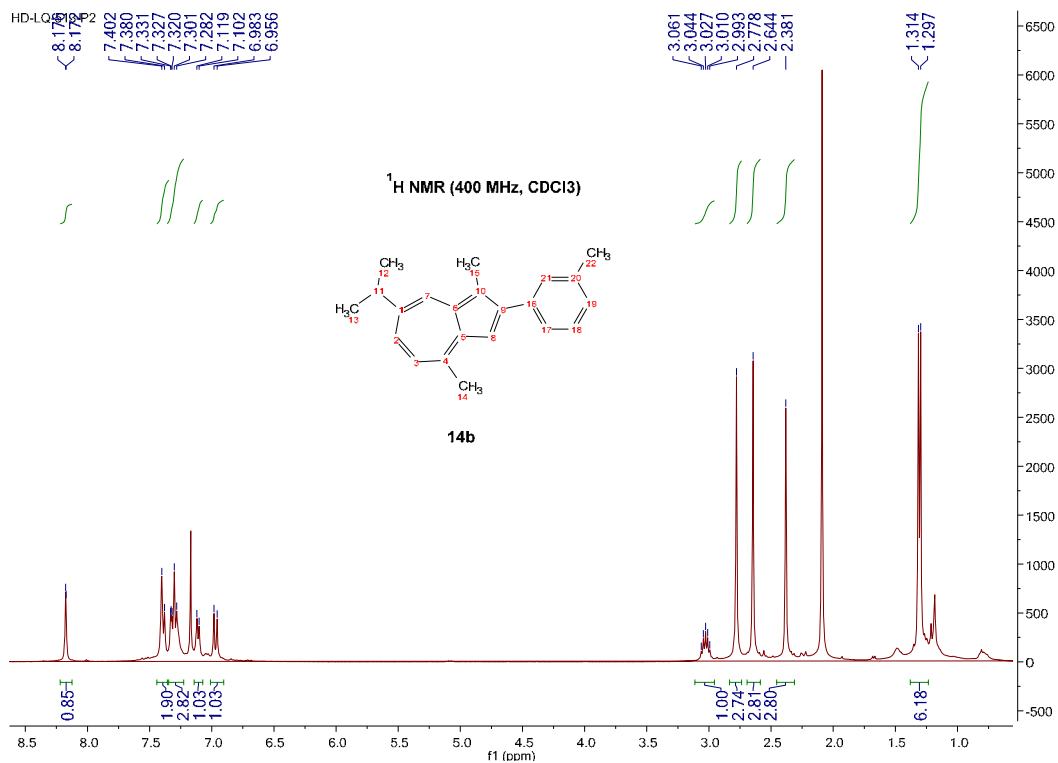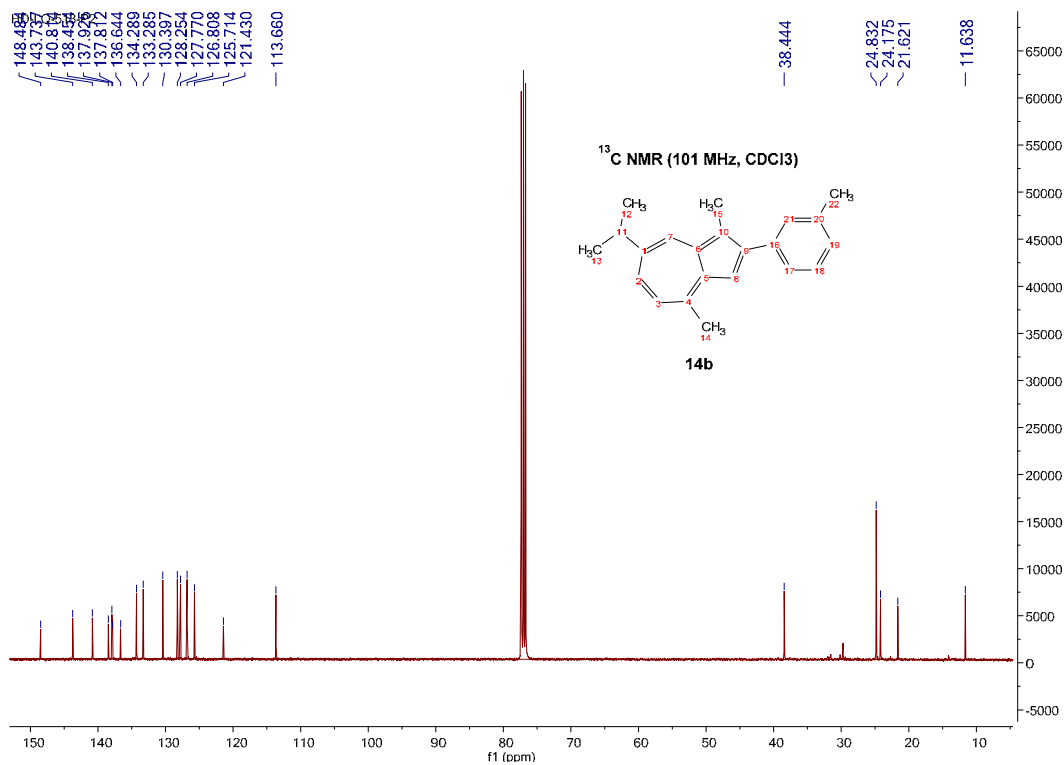

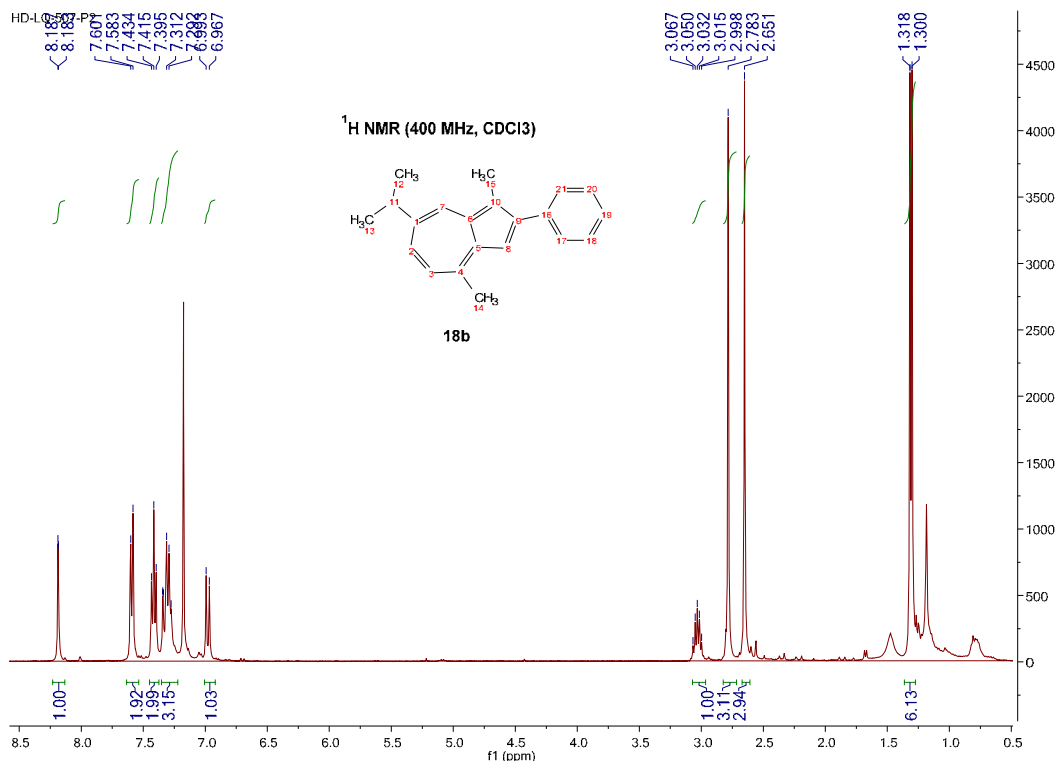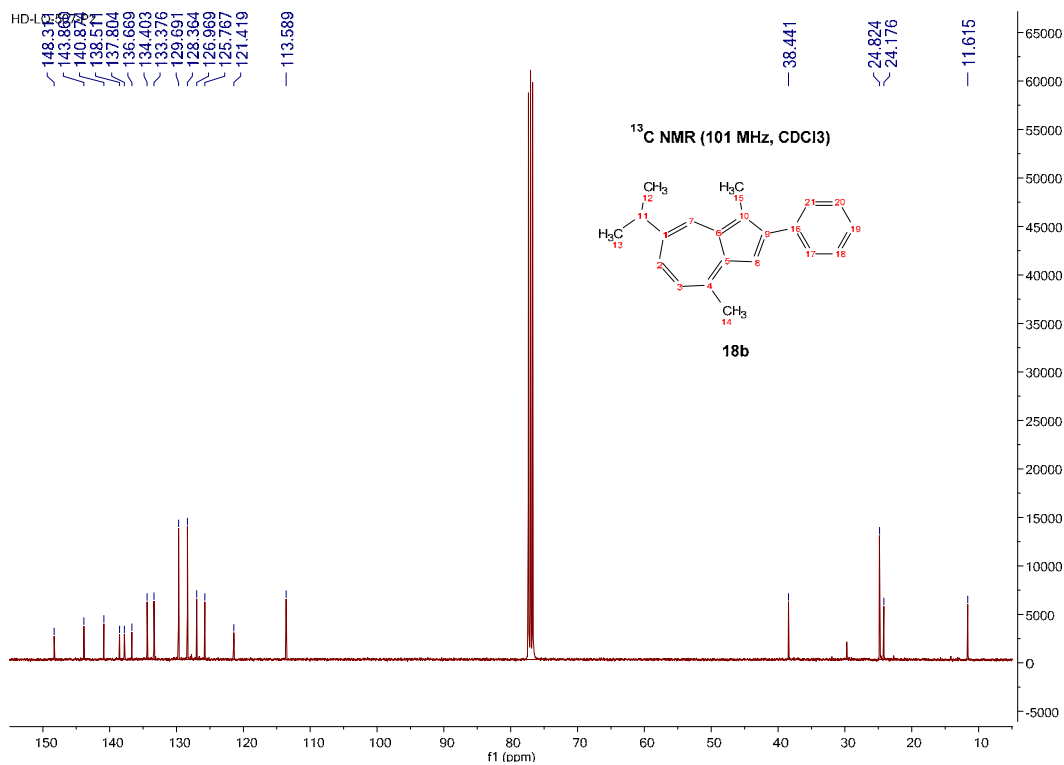

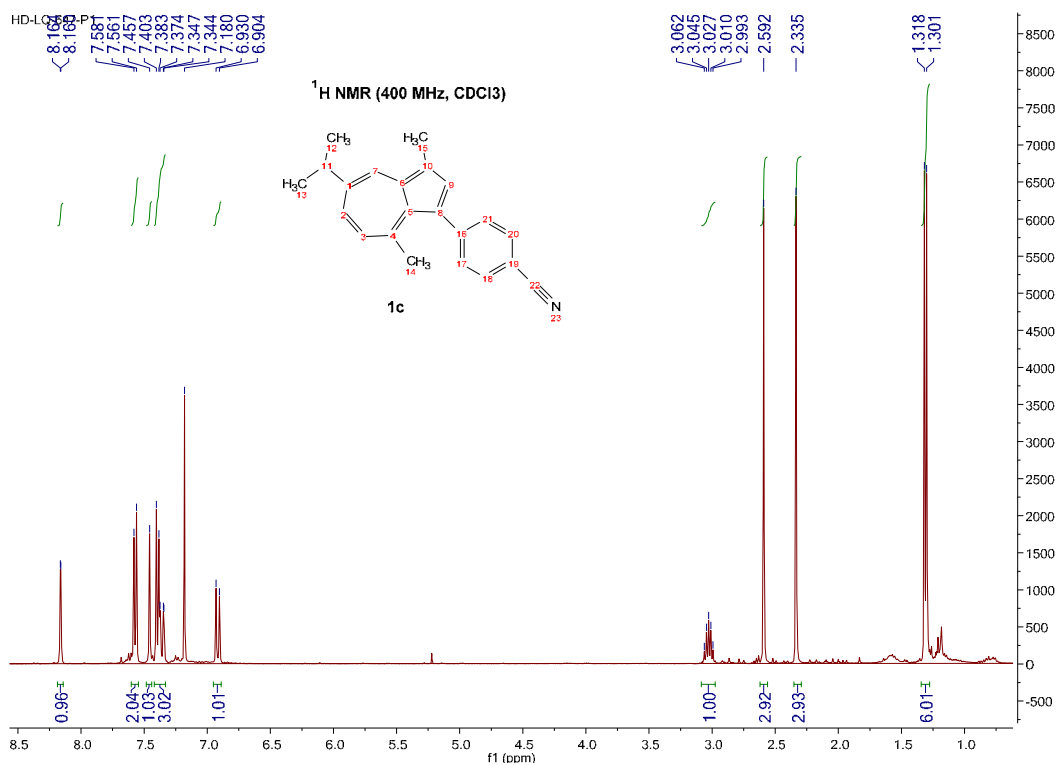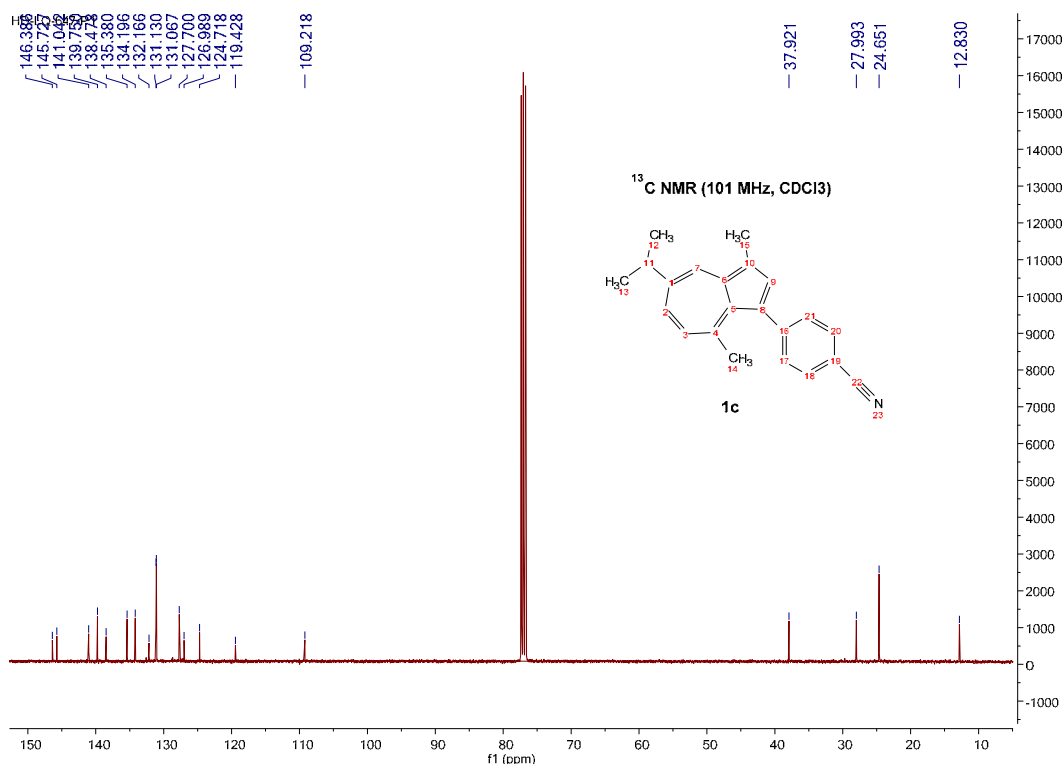

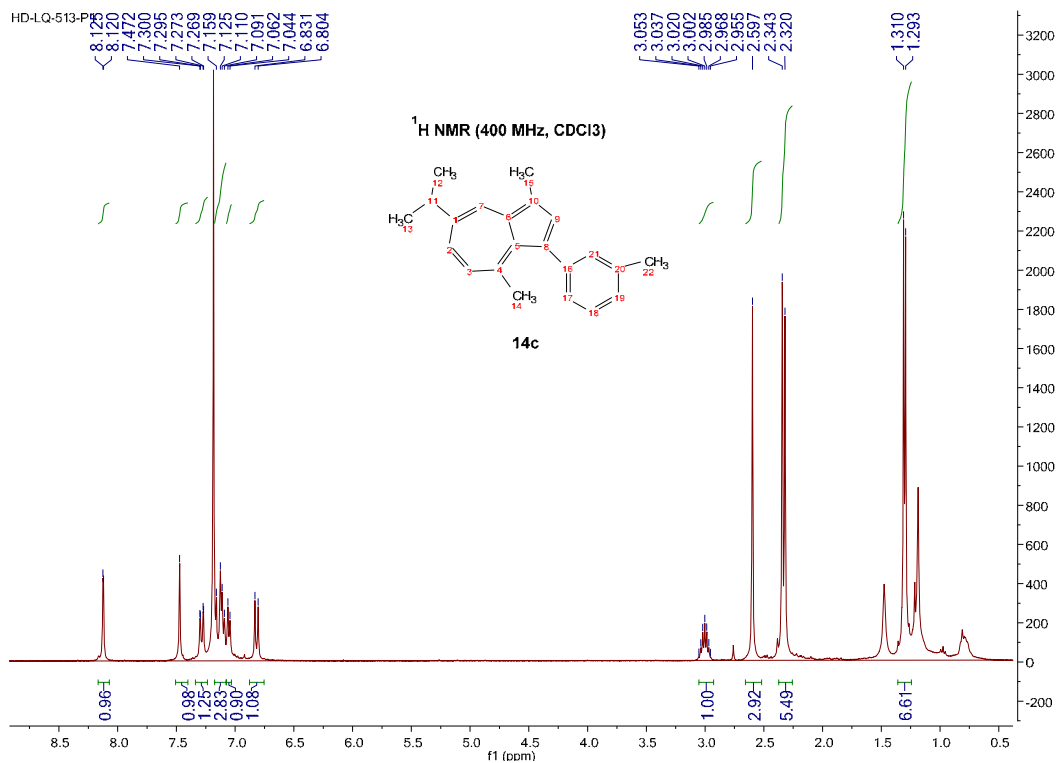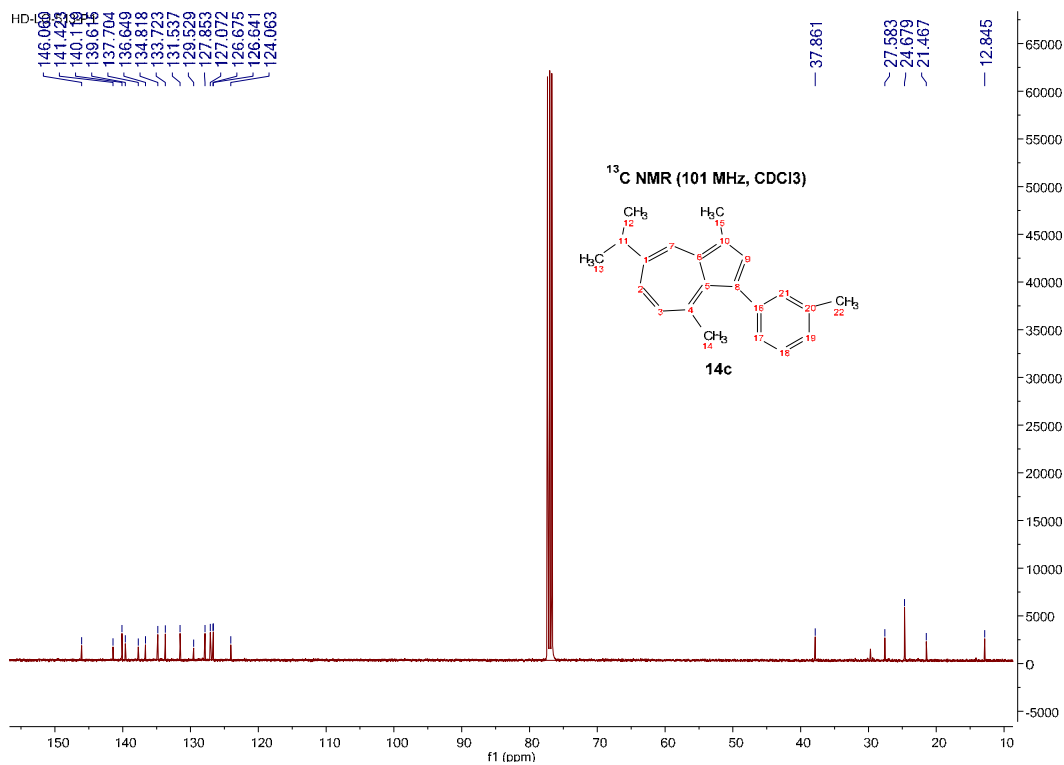

## **NMR experiments for the determination of the C2:C3 regioselectivity**

1q-398-p

<sup>1</sup>H

S. SINBANDHIT

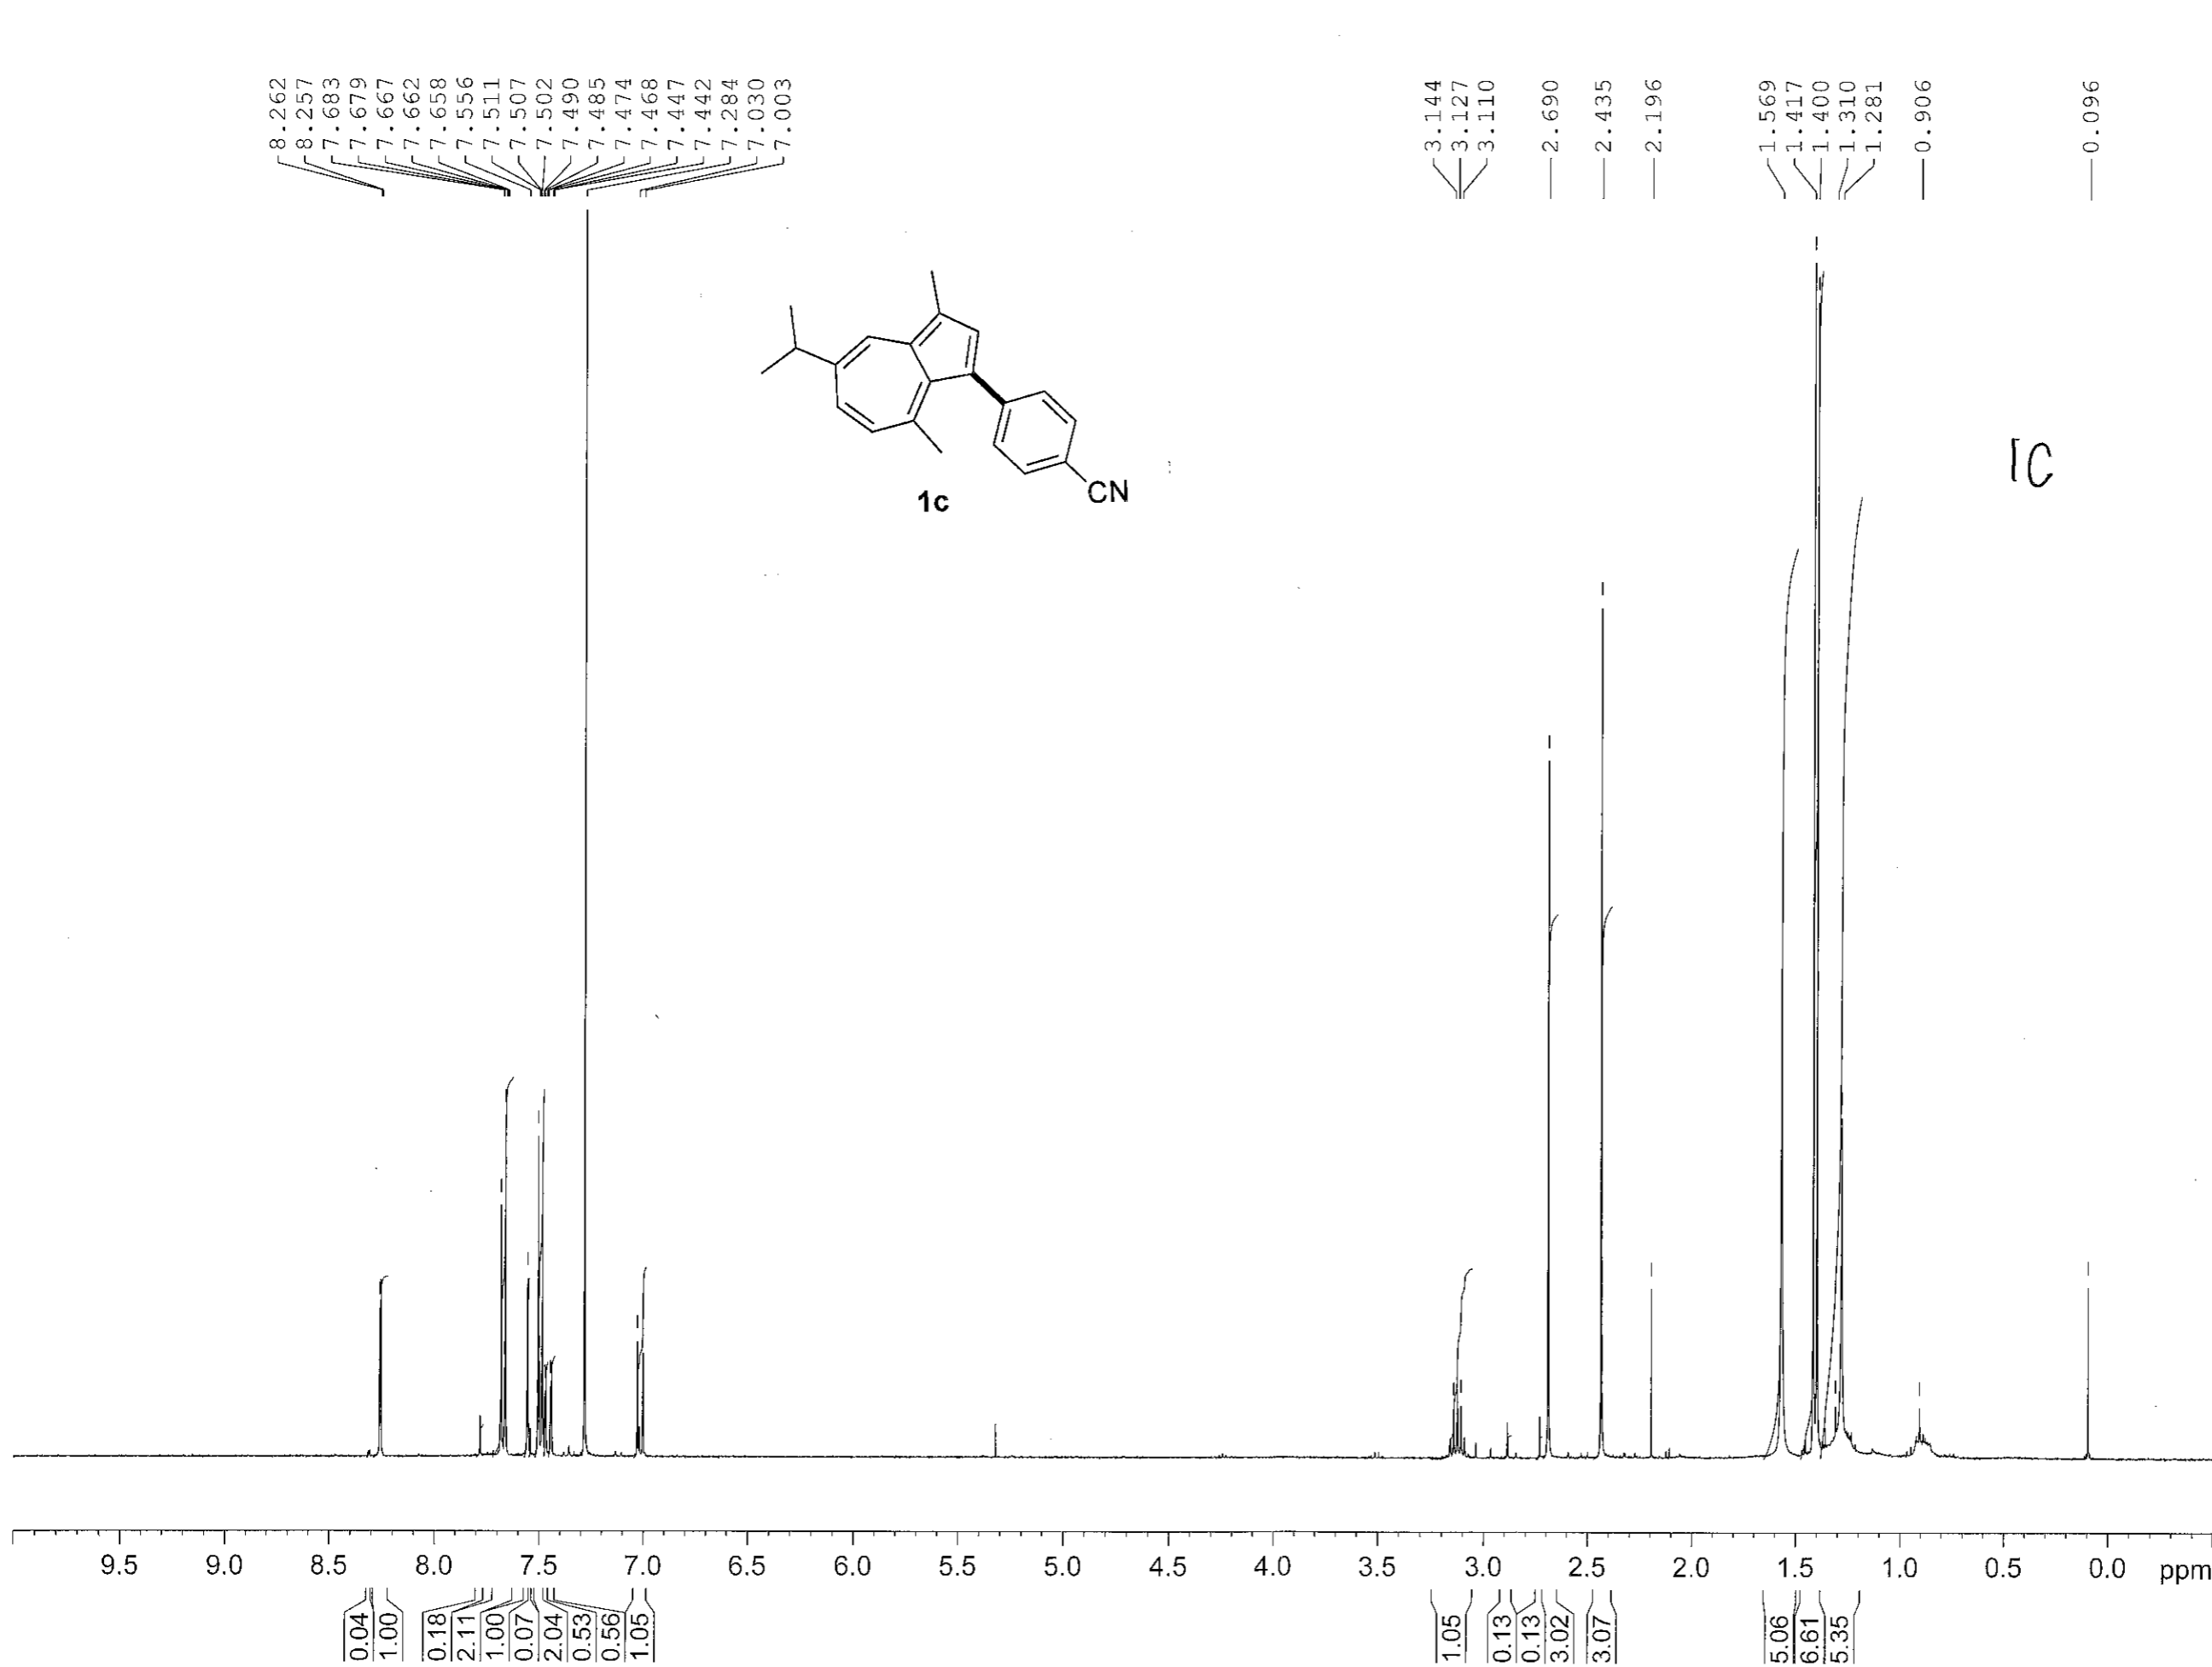

NAME 1q-398-p  
EXPNO 1  
PROCNO 1  
Date\_ 20121030  
Time\_ 10.38  
INSTRUM spect  
PROBHD 5 mm PABBO BB-  
PULPROG zg30  
TD 65536  
SOLVENT CDC13  
NS 64  
DS 2  
SWH 6009.615 Hz  
FIDRES 0.091699 Hz  
AQ 5.4526453 sec  
RG 10  
DW 83.200 use  
DE 6.50 use  
TE 298.1 K  
D1 0.5000000 sec  
TD0 1

===== CHANNEL f1 =====  
NUC1 <sup>1</sup>H  
P1 10.00 use  
PL1 -4.80 dB  
PL1W 24.27448273 W  
SFO1 400.1326809 MHz  
SI 32768  
SF 400.1300000 MHz  
WDW no  
SSB 0  
LB 0.00 Hz  
GB 0  
PC 0.50

1c



1q-398-p

<sup>1</sup>H

S. SINBANDHIT

1258.049  
1251.166  
1244.244

1076.390

974.477

878.485

627.764

567.144  
560.262

524.330  
512.607

```
NAME          1q-398-p
EXPNO          1
PROCNO         1
Date_         20121030
Time_         10.38
INSTRUM       spect
PROBHD        5 mm PABBO BB-
PULPROG       zg30
TD            65536
SOLVENT       CDC13
NS            64
DS            2
SWH           6009.615 Hz
FIDRES        0.091699 Hz
AQ            5.4526453 sec
RG            10
DW            83.200 use
DE            6.50 use
TE            298.1 K
D1            0.5000000 sec
TD0           1
```

```
===== CHANNEL f1 =====
NUC1           1H
P1             10.00 use
PL1            -4.80 dB
PL1W          24.27448273 W
SFO1          400.1326809 MHz
SI             32768
SF            400.1300000 MHz
WDW            no
SSB            0
LB             0.00 Hz
GB             0
PC             0.50
```

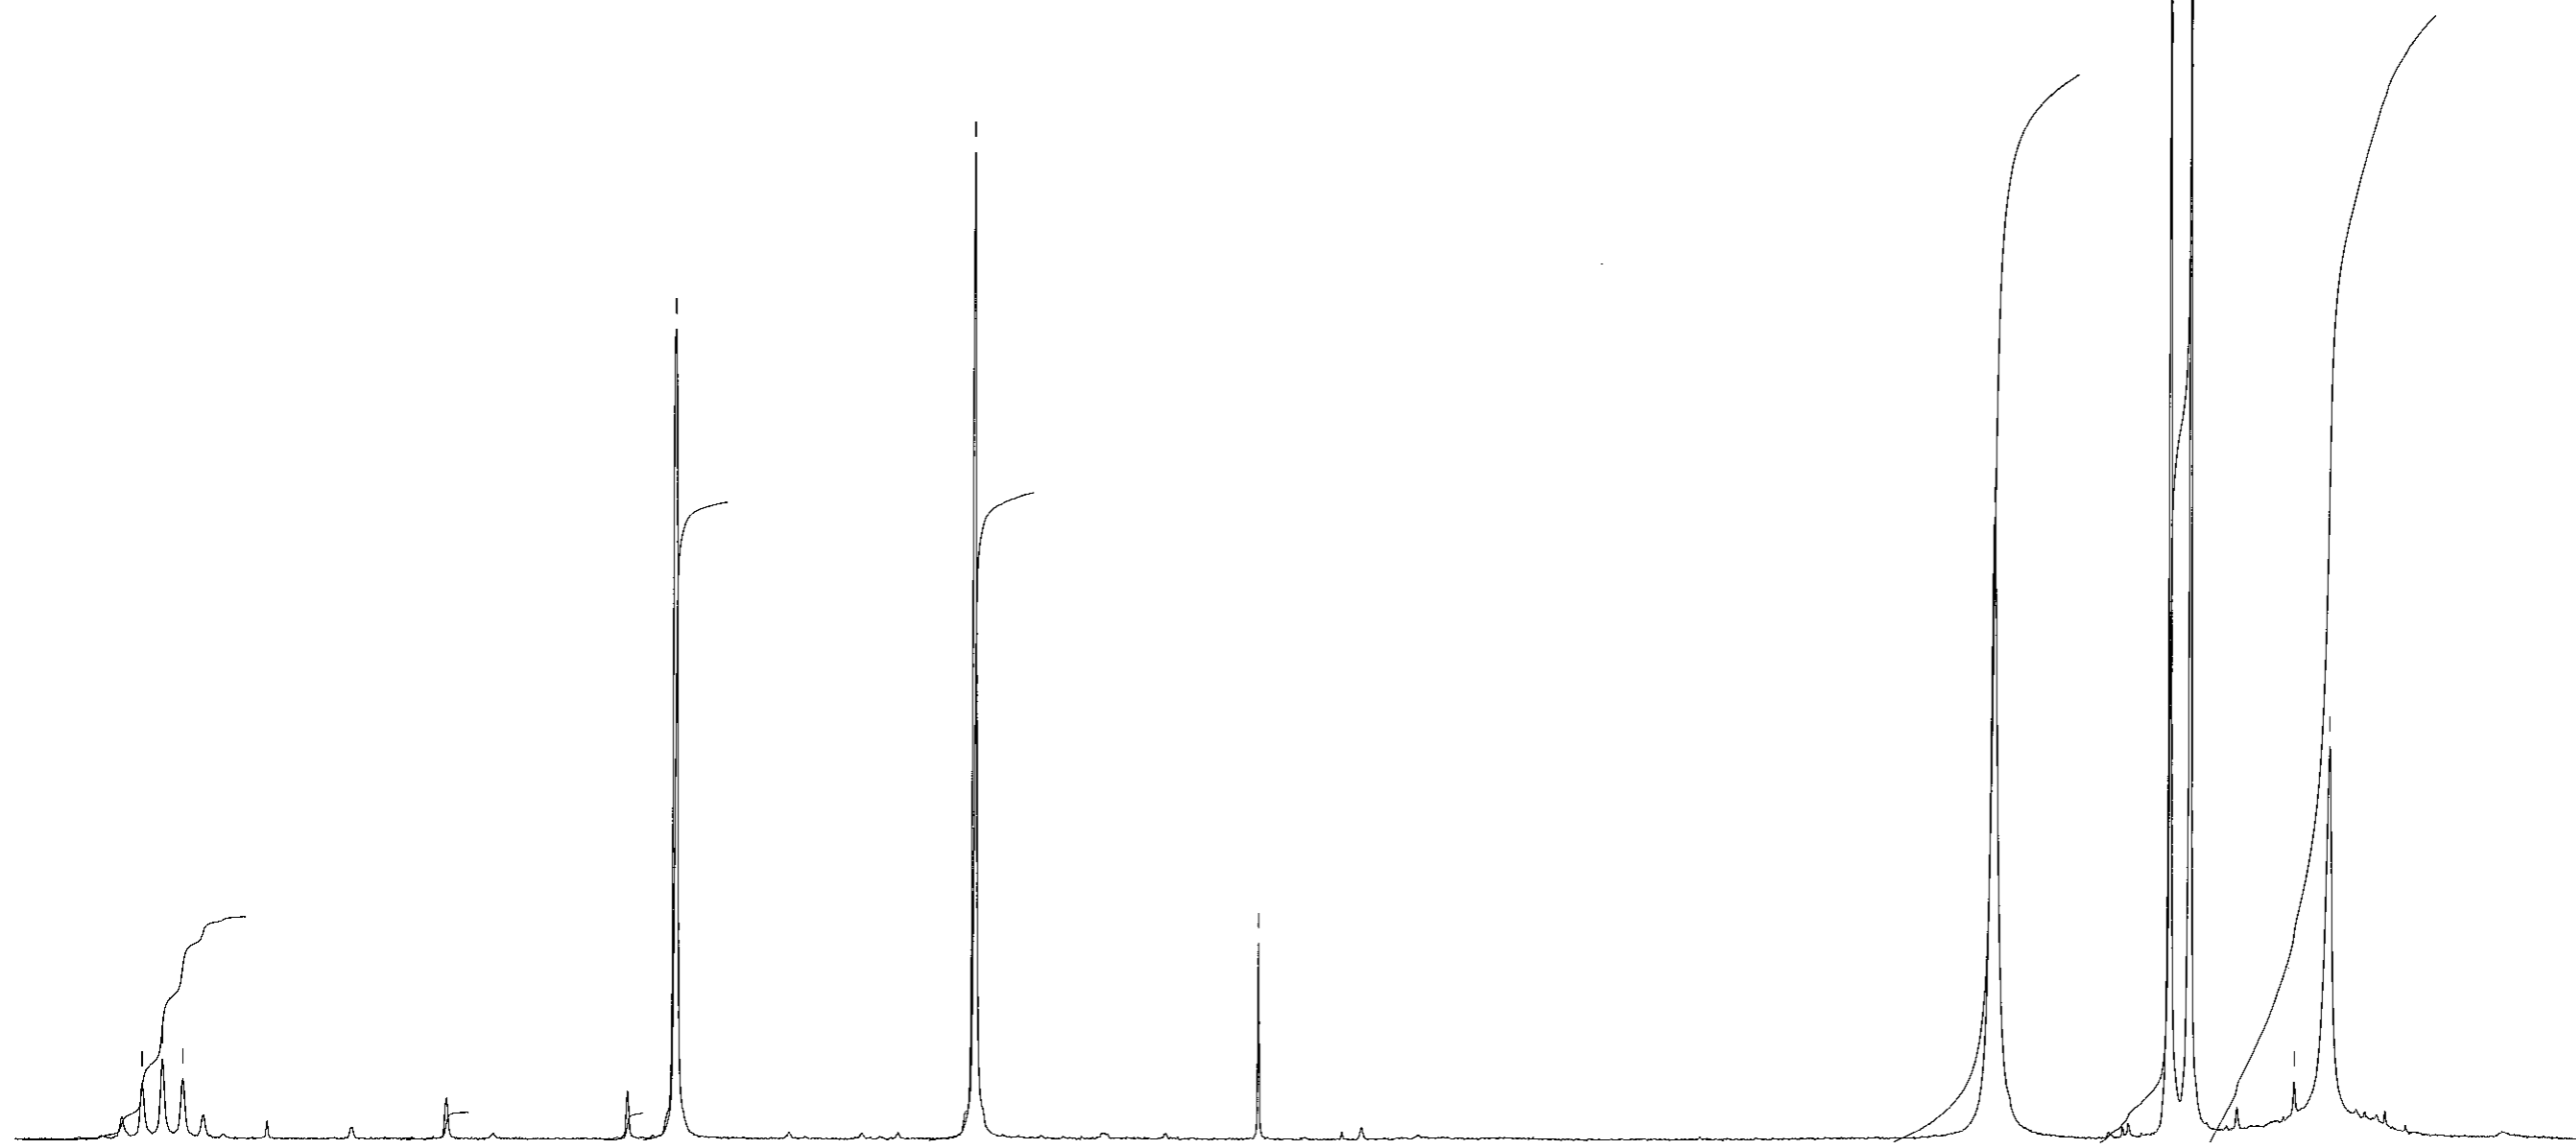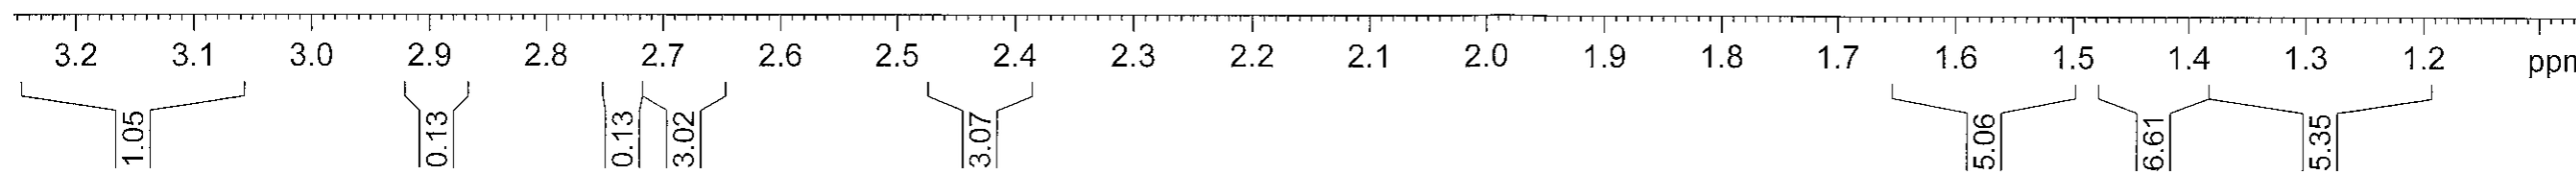

1q-398-p

1H

S. SINBANDHIT

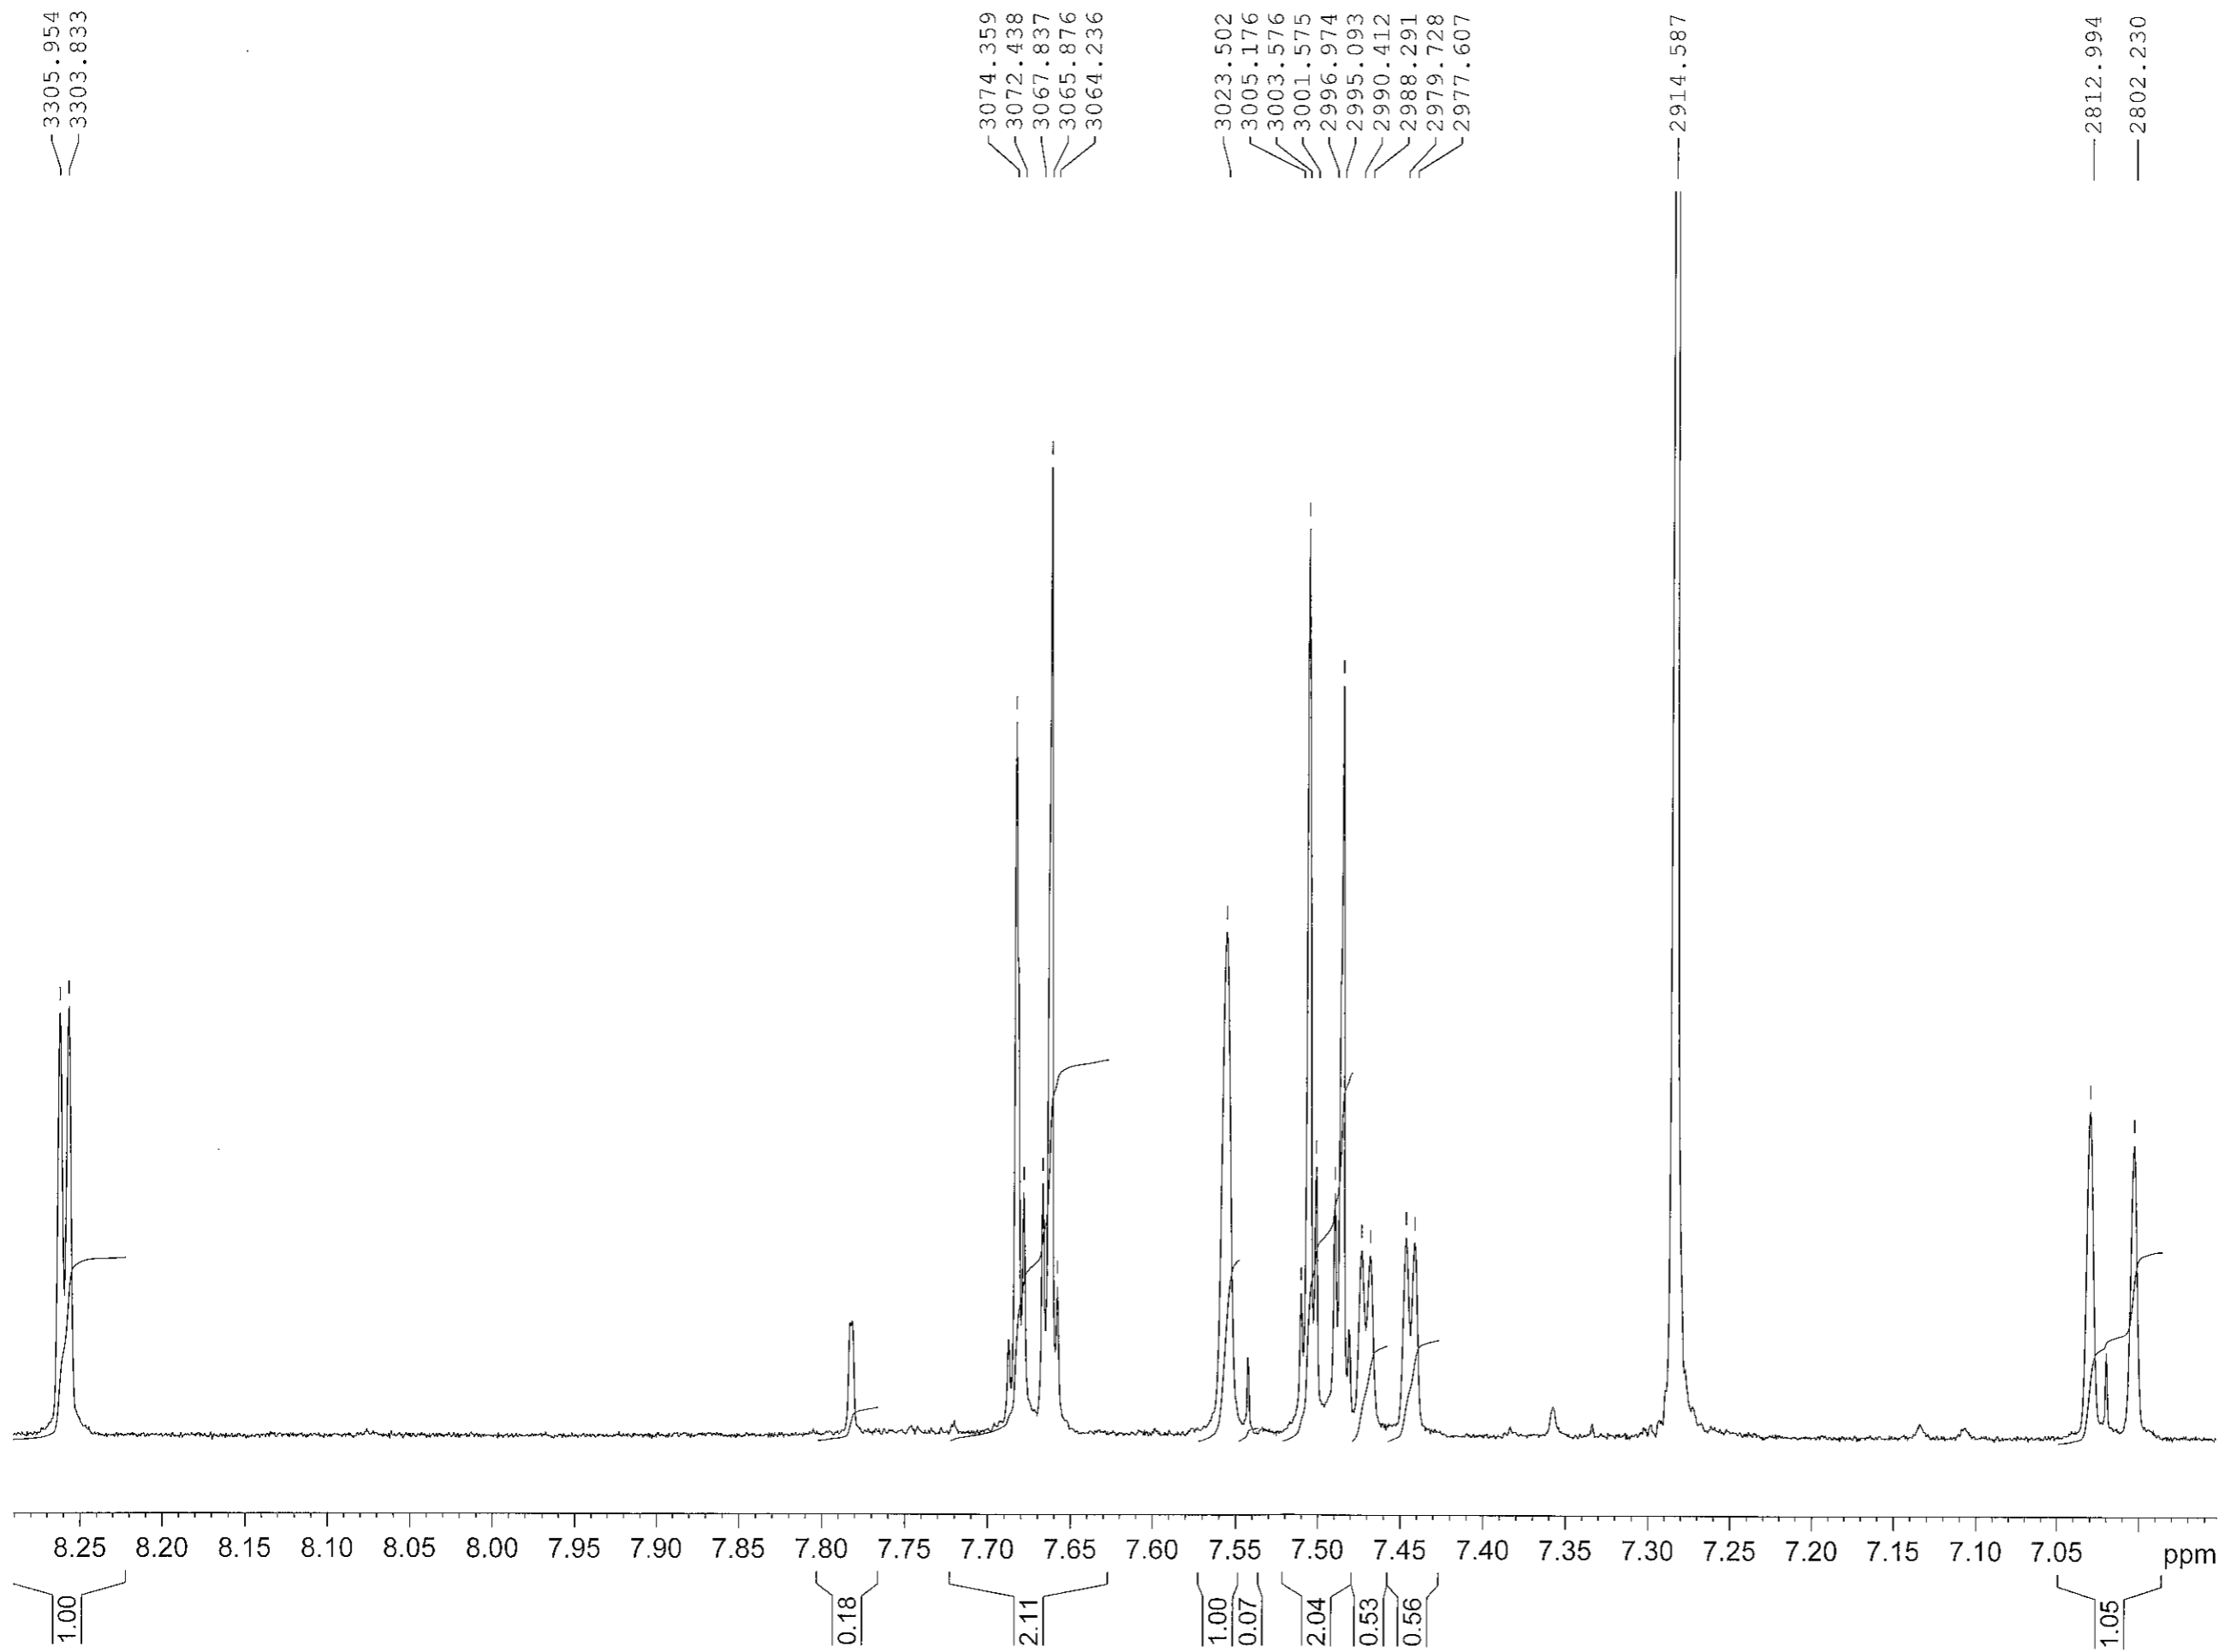

3305.954  
3303.833

3074.359  
3072.438  
3067.837  
3065.876  
3064.236

3023.502  
3005.176  
3003.576  
3001.575  
2996.974  
2995.093  
2990.412  
2988.291  
2979.728  
2977.607

2914.587

2812.994  
2802.230

NAME 1q-398-p  
EXPNO 1  
PROCNO 1  
Date\_ 20121030  
Time 10.38  
INSTRUM spect  
PROBHD 5 mm PABBO BB-  
PULPROG zg30  
TD 65536  
SOLVENT CDCl3  
NS 64  
DS 2  
SWH 6009.615 Hz  
FIDRES 0.091699 Hz  
AQ 5.4526453 sec  
RG 10  
DW 83.200 use  
DE 6.50 use  
TE 298.1 K  
D1 0.5000000 sec  
TD0 1

===== CHANNEL f1 =====  
NUC1 1H  
P1 10.00 use  
PL1 -4.80 dB  
PL1W 24.27448273 W  
SFO1 400.1326809 MHz  
SI 32768  
SF 400.1300000 MHz  
WDW no  
SSB 0  
LB 0.00 Hz  
GB 0  
PC 0.50

lq-398-p

13C

S. SINBANDHIT

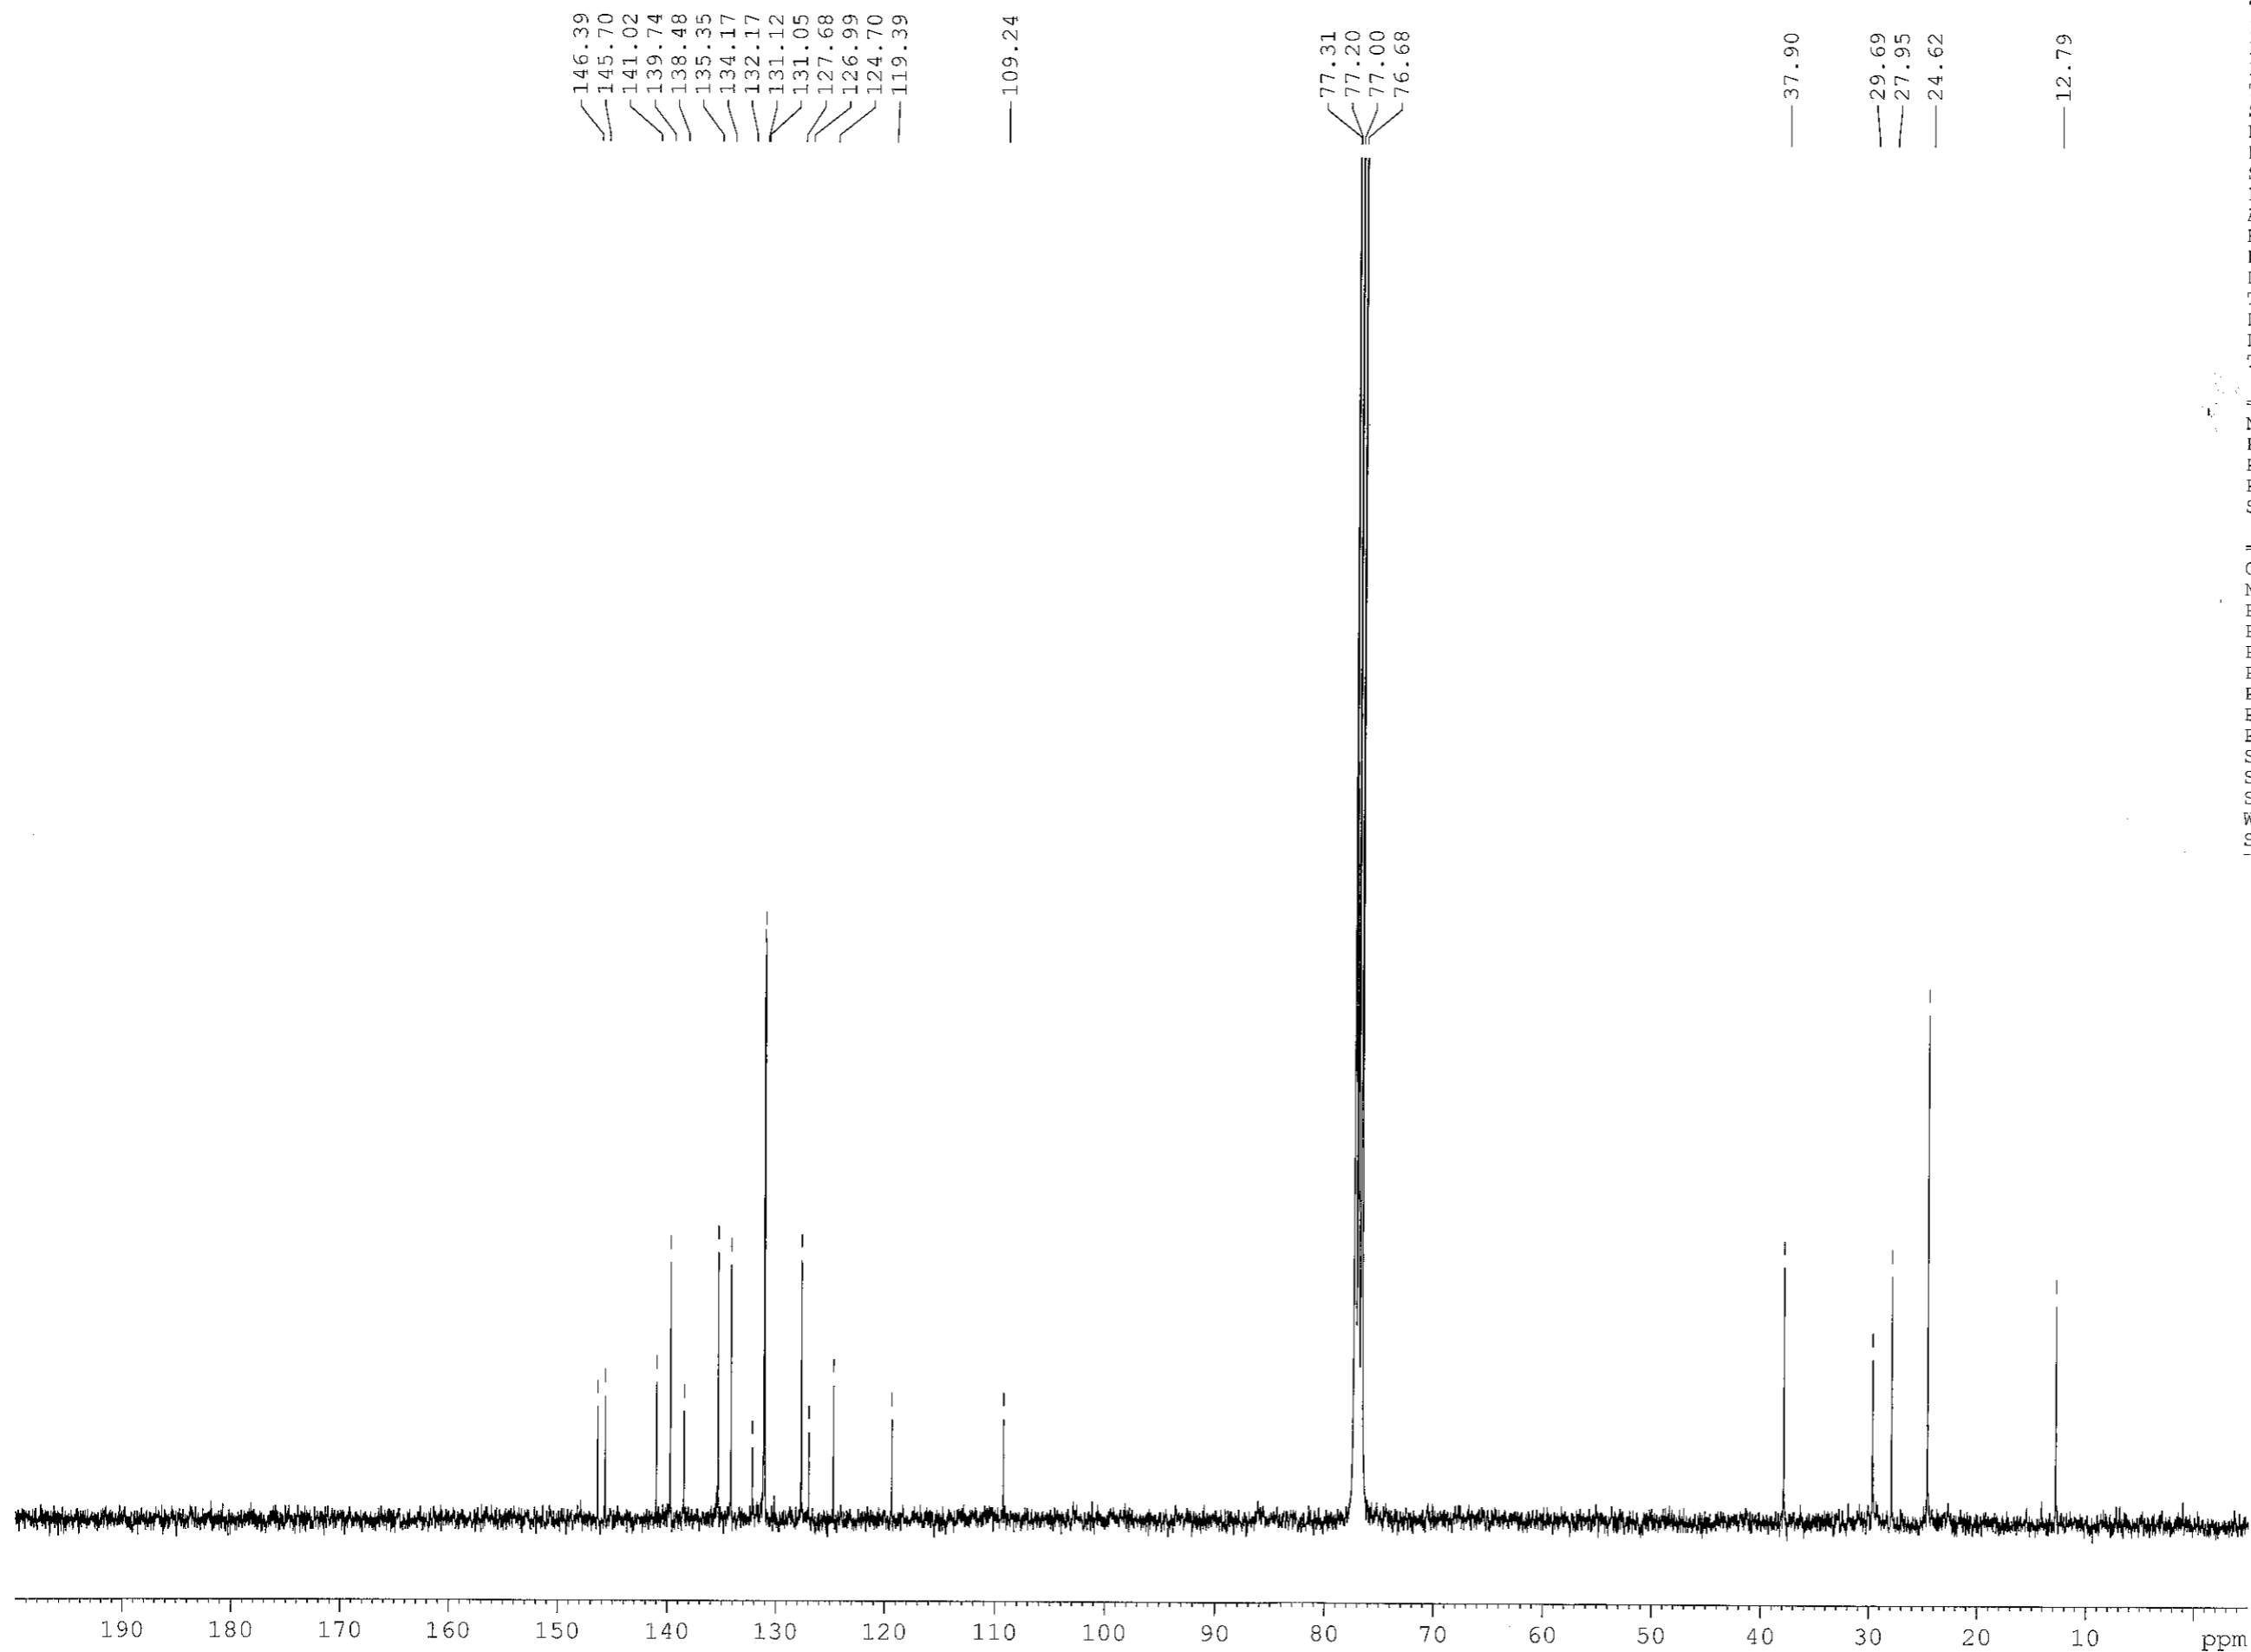

NAME lq-398-p  
EXPNO 4  
PROCNO 1  
Date\_ 20121031  
Time 9.12  
INSTRUM spect  
PROBHD 5 mm PABBO BB-  
PULPROG zgpg  
TD 65536  
SOLVENT CDC13  
NS 4570  
DS 2  
SWH 24038.461 Hz  
FIDRES 0.366798 Hz  
AQ 1.3631988 sec  
RG 2050  
DW 20.800 usec  
DE 10.00 usec  
TE 299.5 K  
D1 5.00000000 sec  
D11 0.03000000 sec  
TD0 1

==== CHANNEL f1 =====  
NUC1 13C  
P1 6.80 usec  
PL1 -3.10 dB  
PL1W 66.67198181 W  
SFO1 100.6233333 MHZ

==== CHANNEL f2 =====  
CPDPRG2 waltz16  
NUC2 1H  
PCPD2 100.00 usec  
PL2 -4.80 dB  
PL12 15.20 dB  
PL13 15.20 dB  
PL2W 24.27448273 W  
PL12W 0.24274483 W  
PL13W 0.24274483 W  
SFO2 400.1316005 MHZ  
SI 32768  
SF 100.6127690 MHZ  
WDW EM  
SSB 0

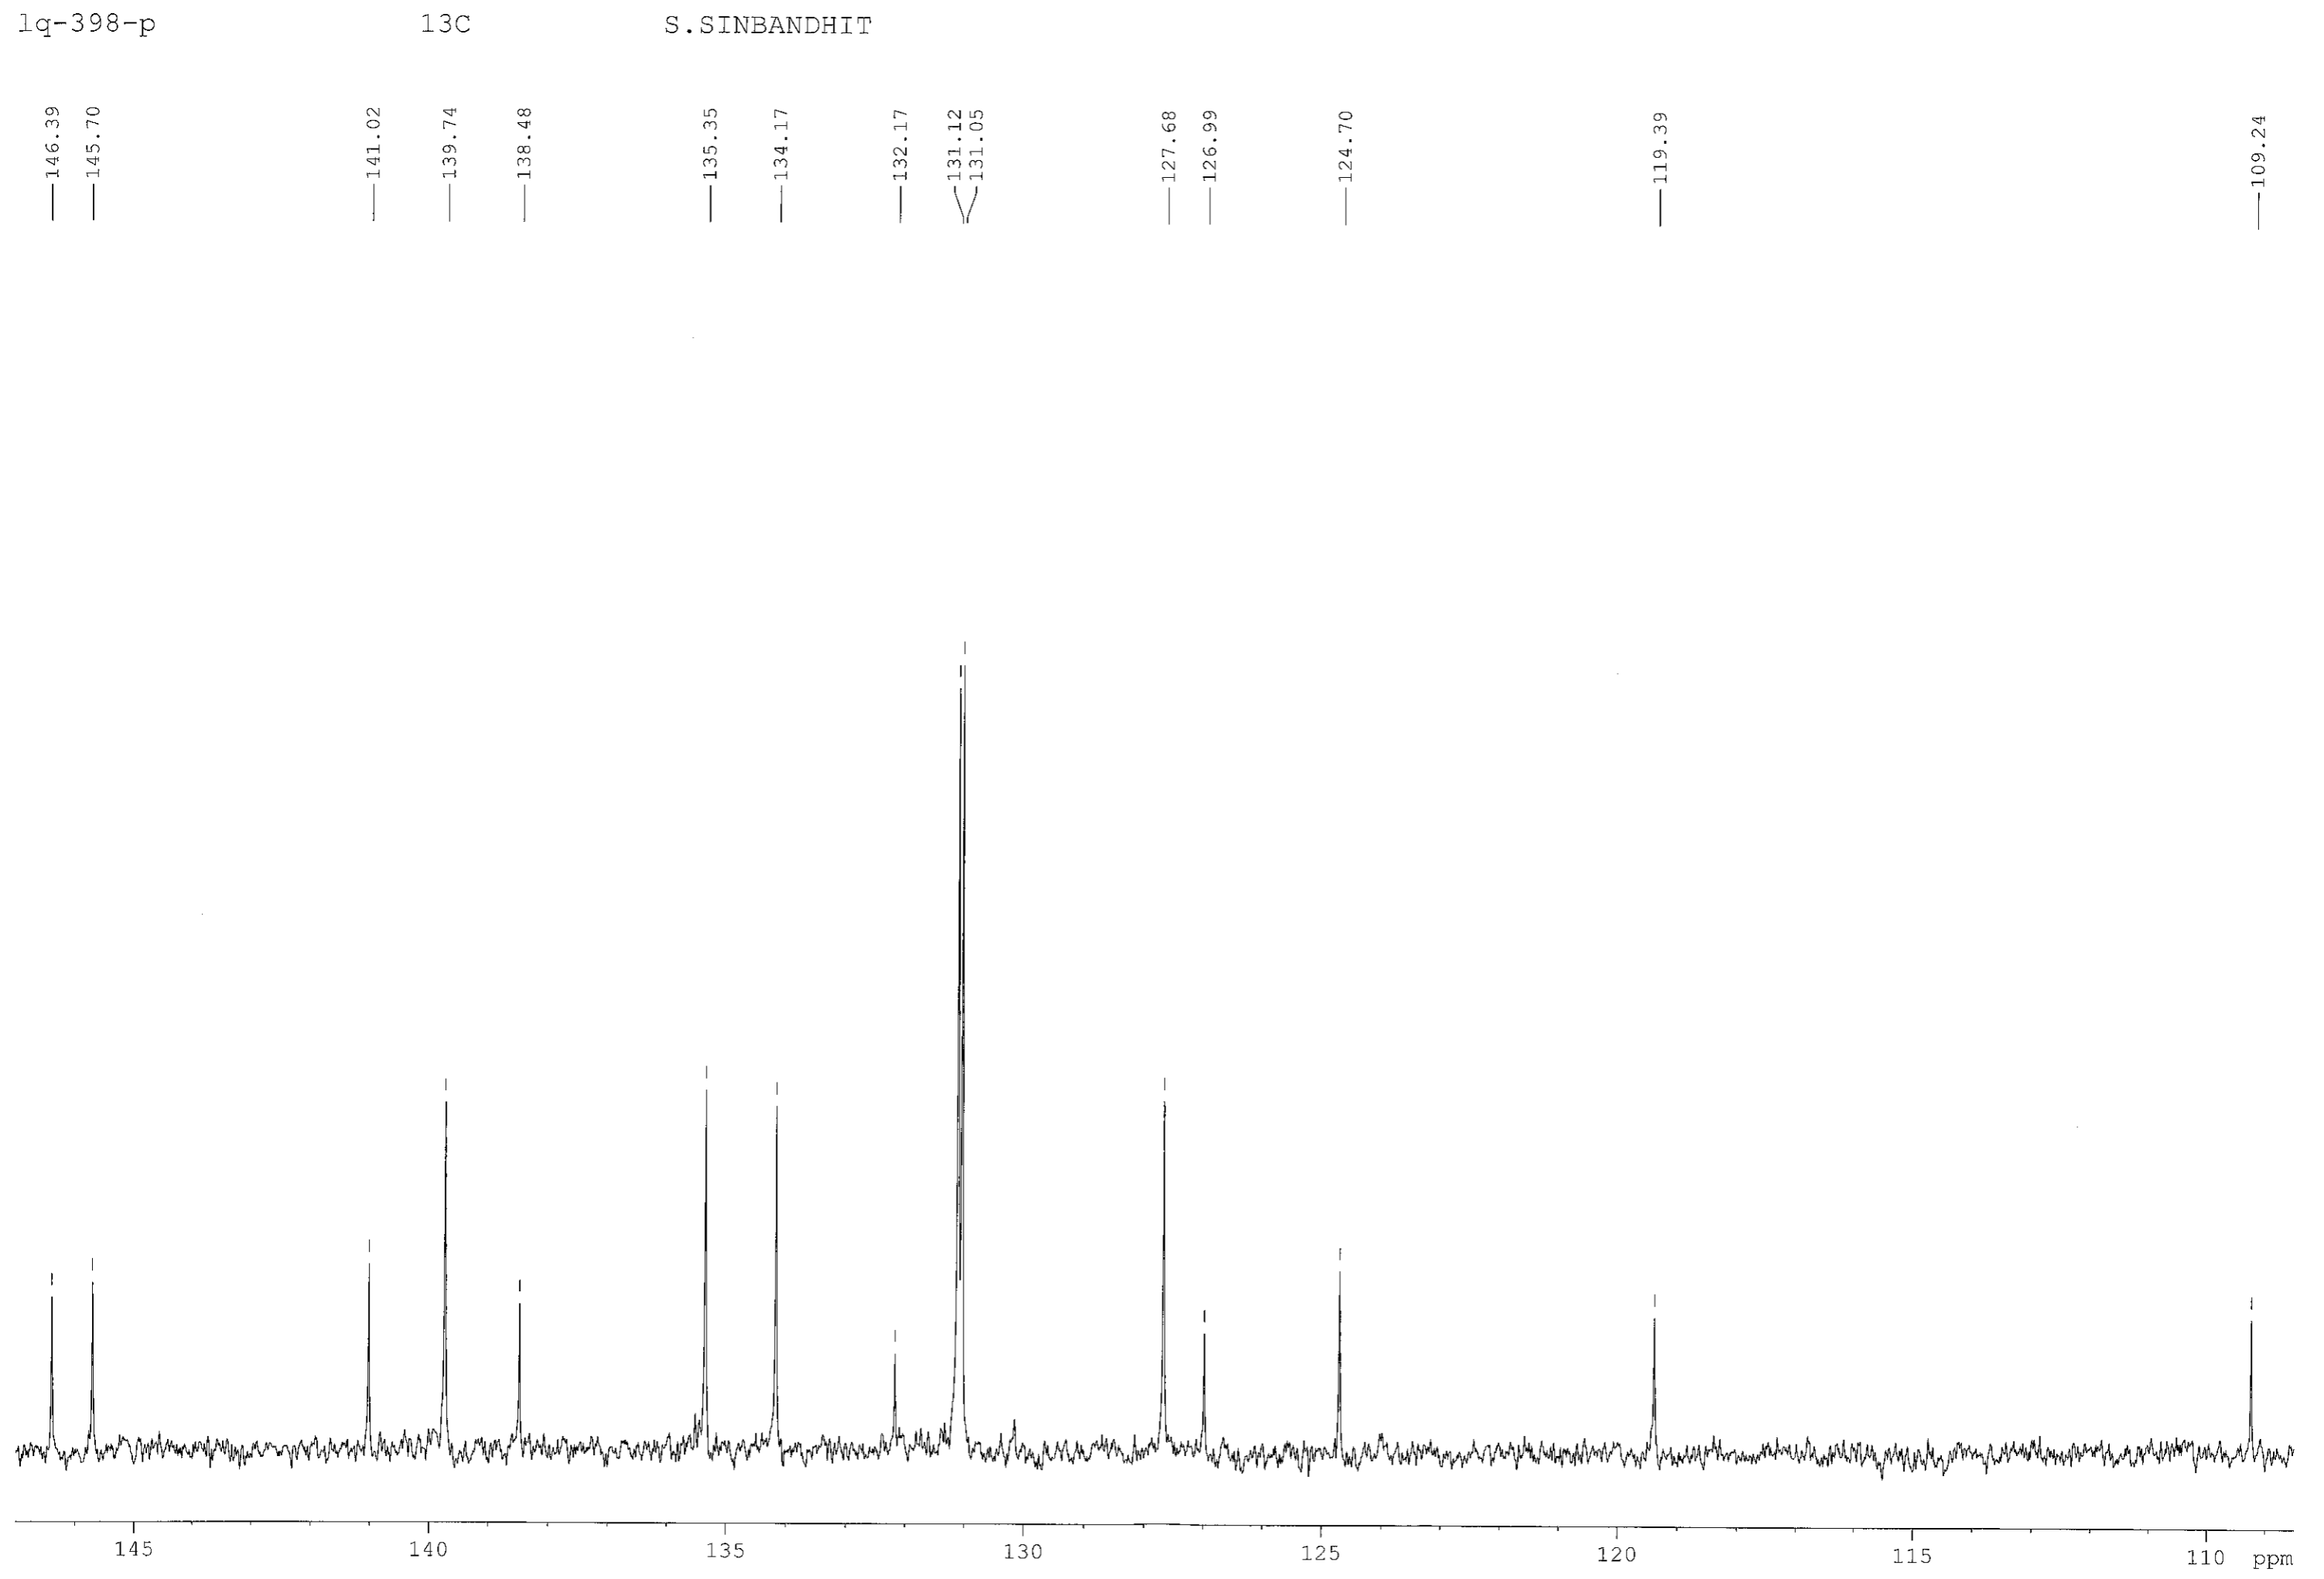

1q-398-p

HMBC

S. SINBANDHIT

1c

```
NAME          1q-398-p
EXPNO         3
PROCNO        1
Date_         20121030
Time_         17.34
INSTRUM       spect
PROBHD        5 mm PABBO BB-
PULPROG       hmbcgp1pndqf
TD            2048
SOLVENT       CDC13
NS            40
DS            16
SWH           3440.367 Hz
FIDRES        1.679867 Hz
AQ            0.2976927 sec
RG            2050
DW            145.333 usec
DE            6.50 usec
TE            299.7 K
CNST2         164.0000000
CNST13        6.3000002
D0            0.0000300 sec
D1            1.79999995 sec
D2            0.00304878 sec
D6            0.07936507 sec
D16           0.00010000 sec
IN0           0.00003500 sec
```

```
==== CHANNEL f1 =====
NUC1          1H
P1            10.00 usec
P2            20.00 usec
PL1           -4.80 dB
PL1W          24.27448273 W
SFO1          400.1320007 MHz
```

```
==== CHANNEL f2 =====
NUC2          13C
P3            9.00 usec
PL2           -3.10 dB
PL2W          66.67198181 W
SFO2          100.6208180 MHz
```

```
==== GRADIENT CHANNEL =====
GPNAM1        SINE.100
GPNAM2        SINE.100
GPNAM3        SINE.100
GPZ1          50.00 %
GPZ2          30.00 %
GPZ3          40.10 %
P16           1000.00 usec
ND0           2
TD            320
SFO1          100.6208 MHz
FIDRES        44.650490 Hz
SW            142.000 ppm
FMODE         QF
SI            1024
SF            400.1299982 MHz
WDW           QSINE
SSB           4
LB            0.00 Hz
GB            0
PC            1.40
SI            512
MC2           QF
SF            100.6127590 MHz
WDW           QSINE
SSB           4
LB            0.00 Hz
GB            0
```

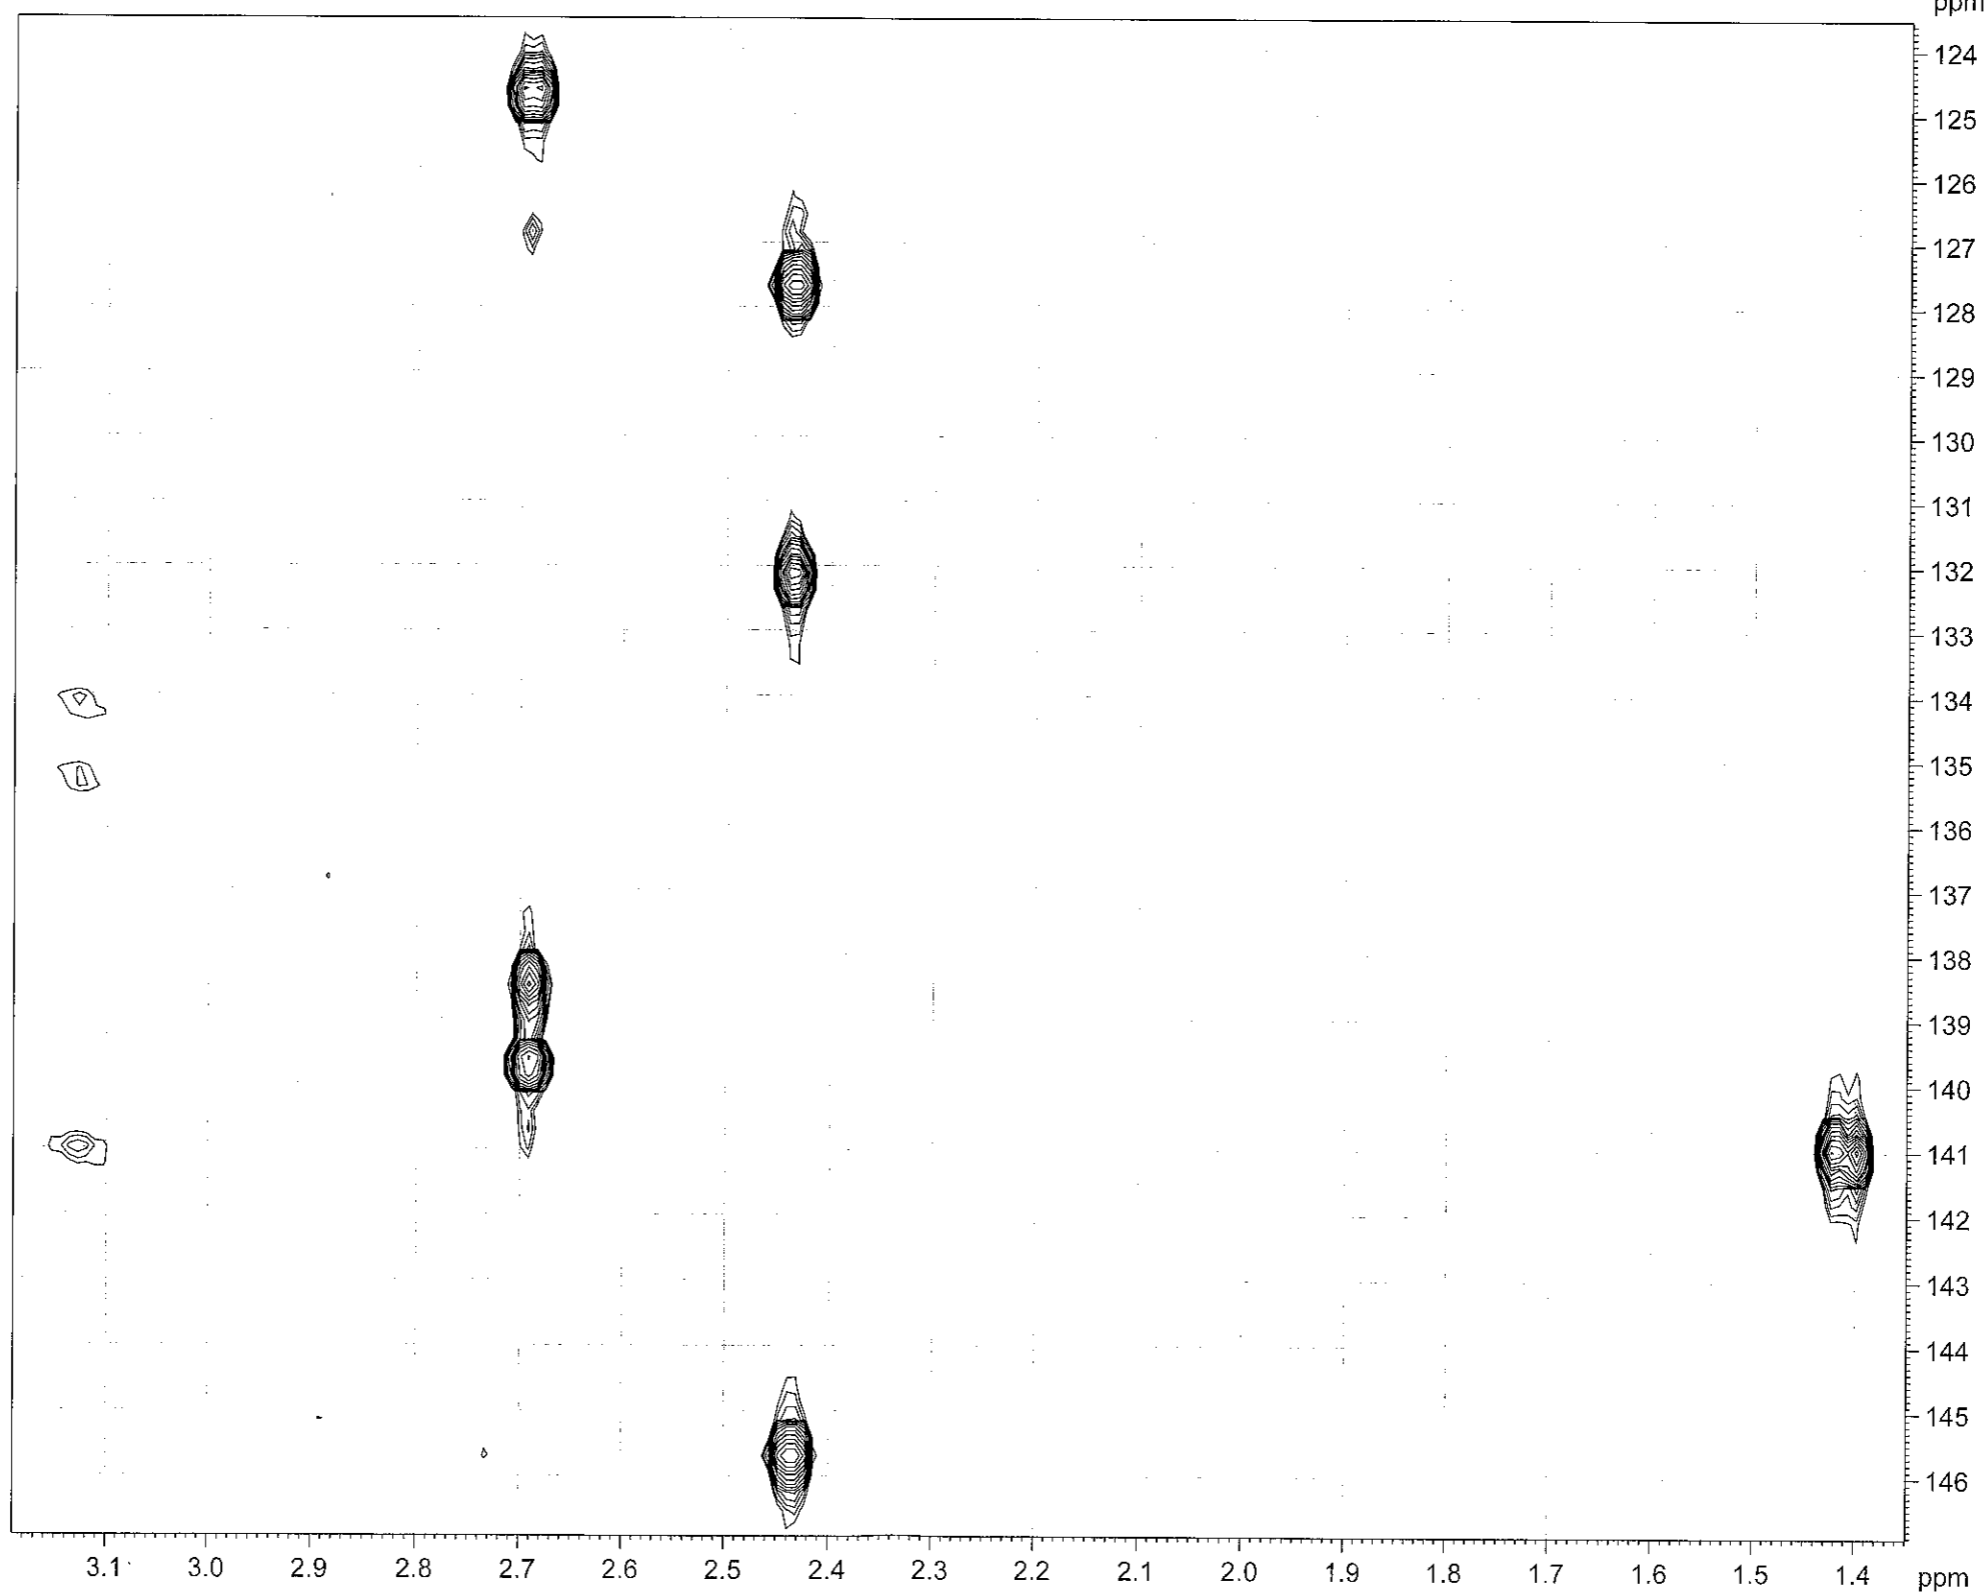

1q-398-p

HMBC

S. SINBANDHIT

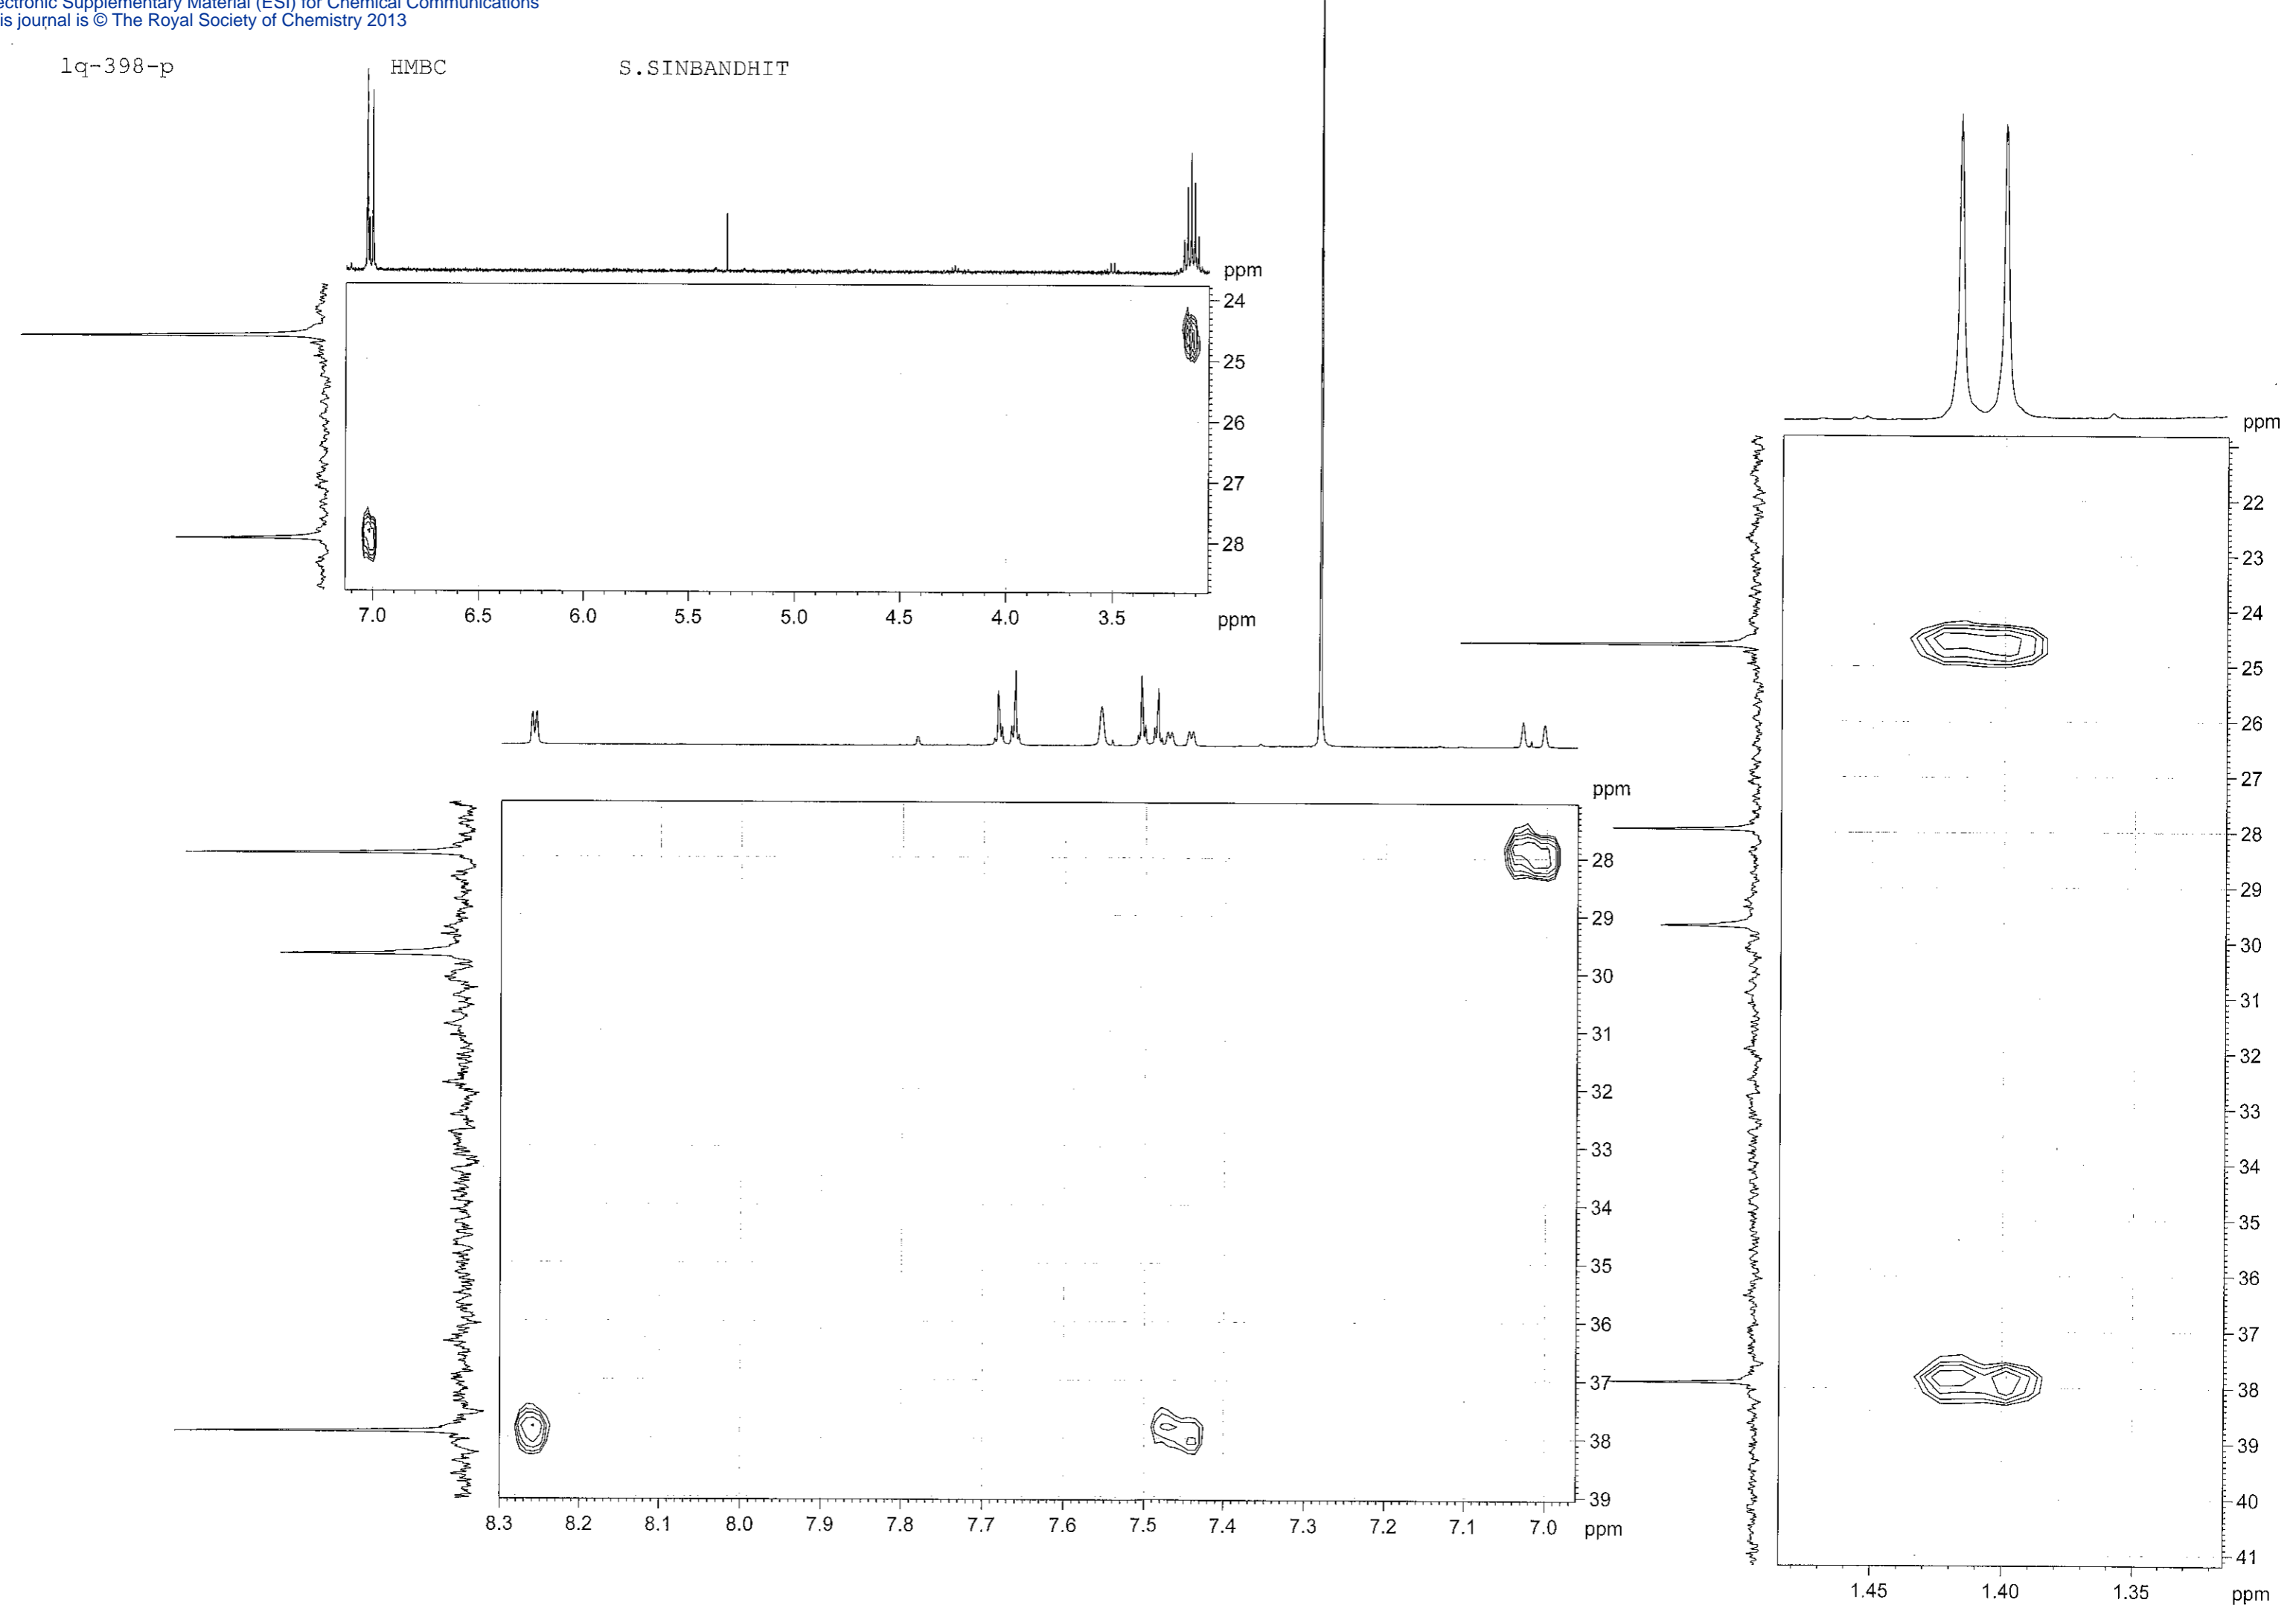

lq-398-p

HMBC

S.SINBANDHIT

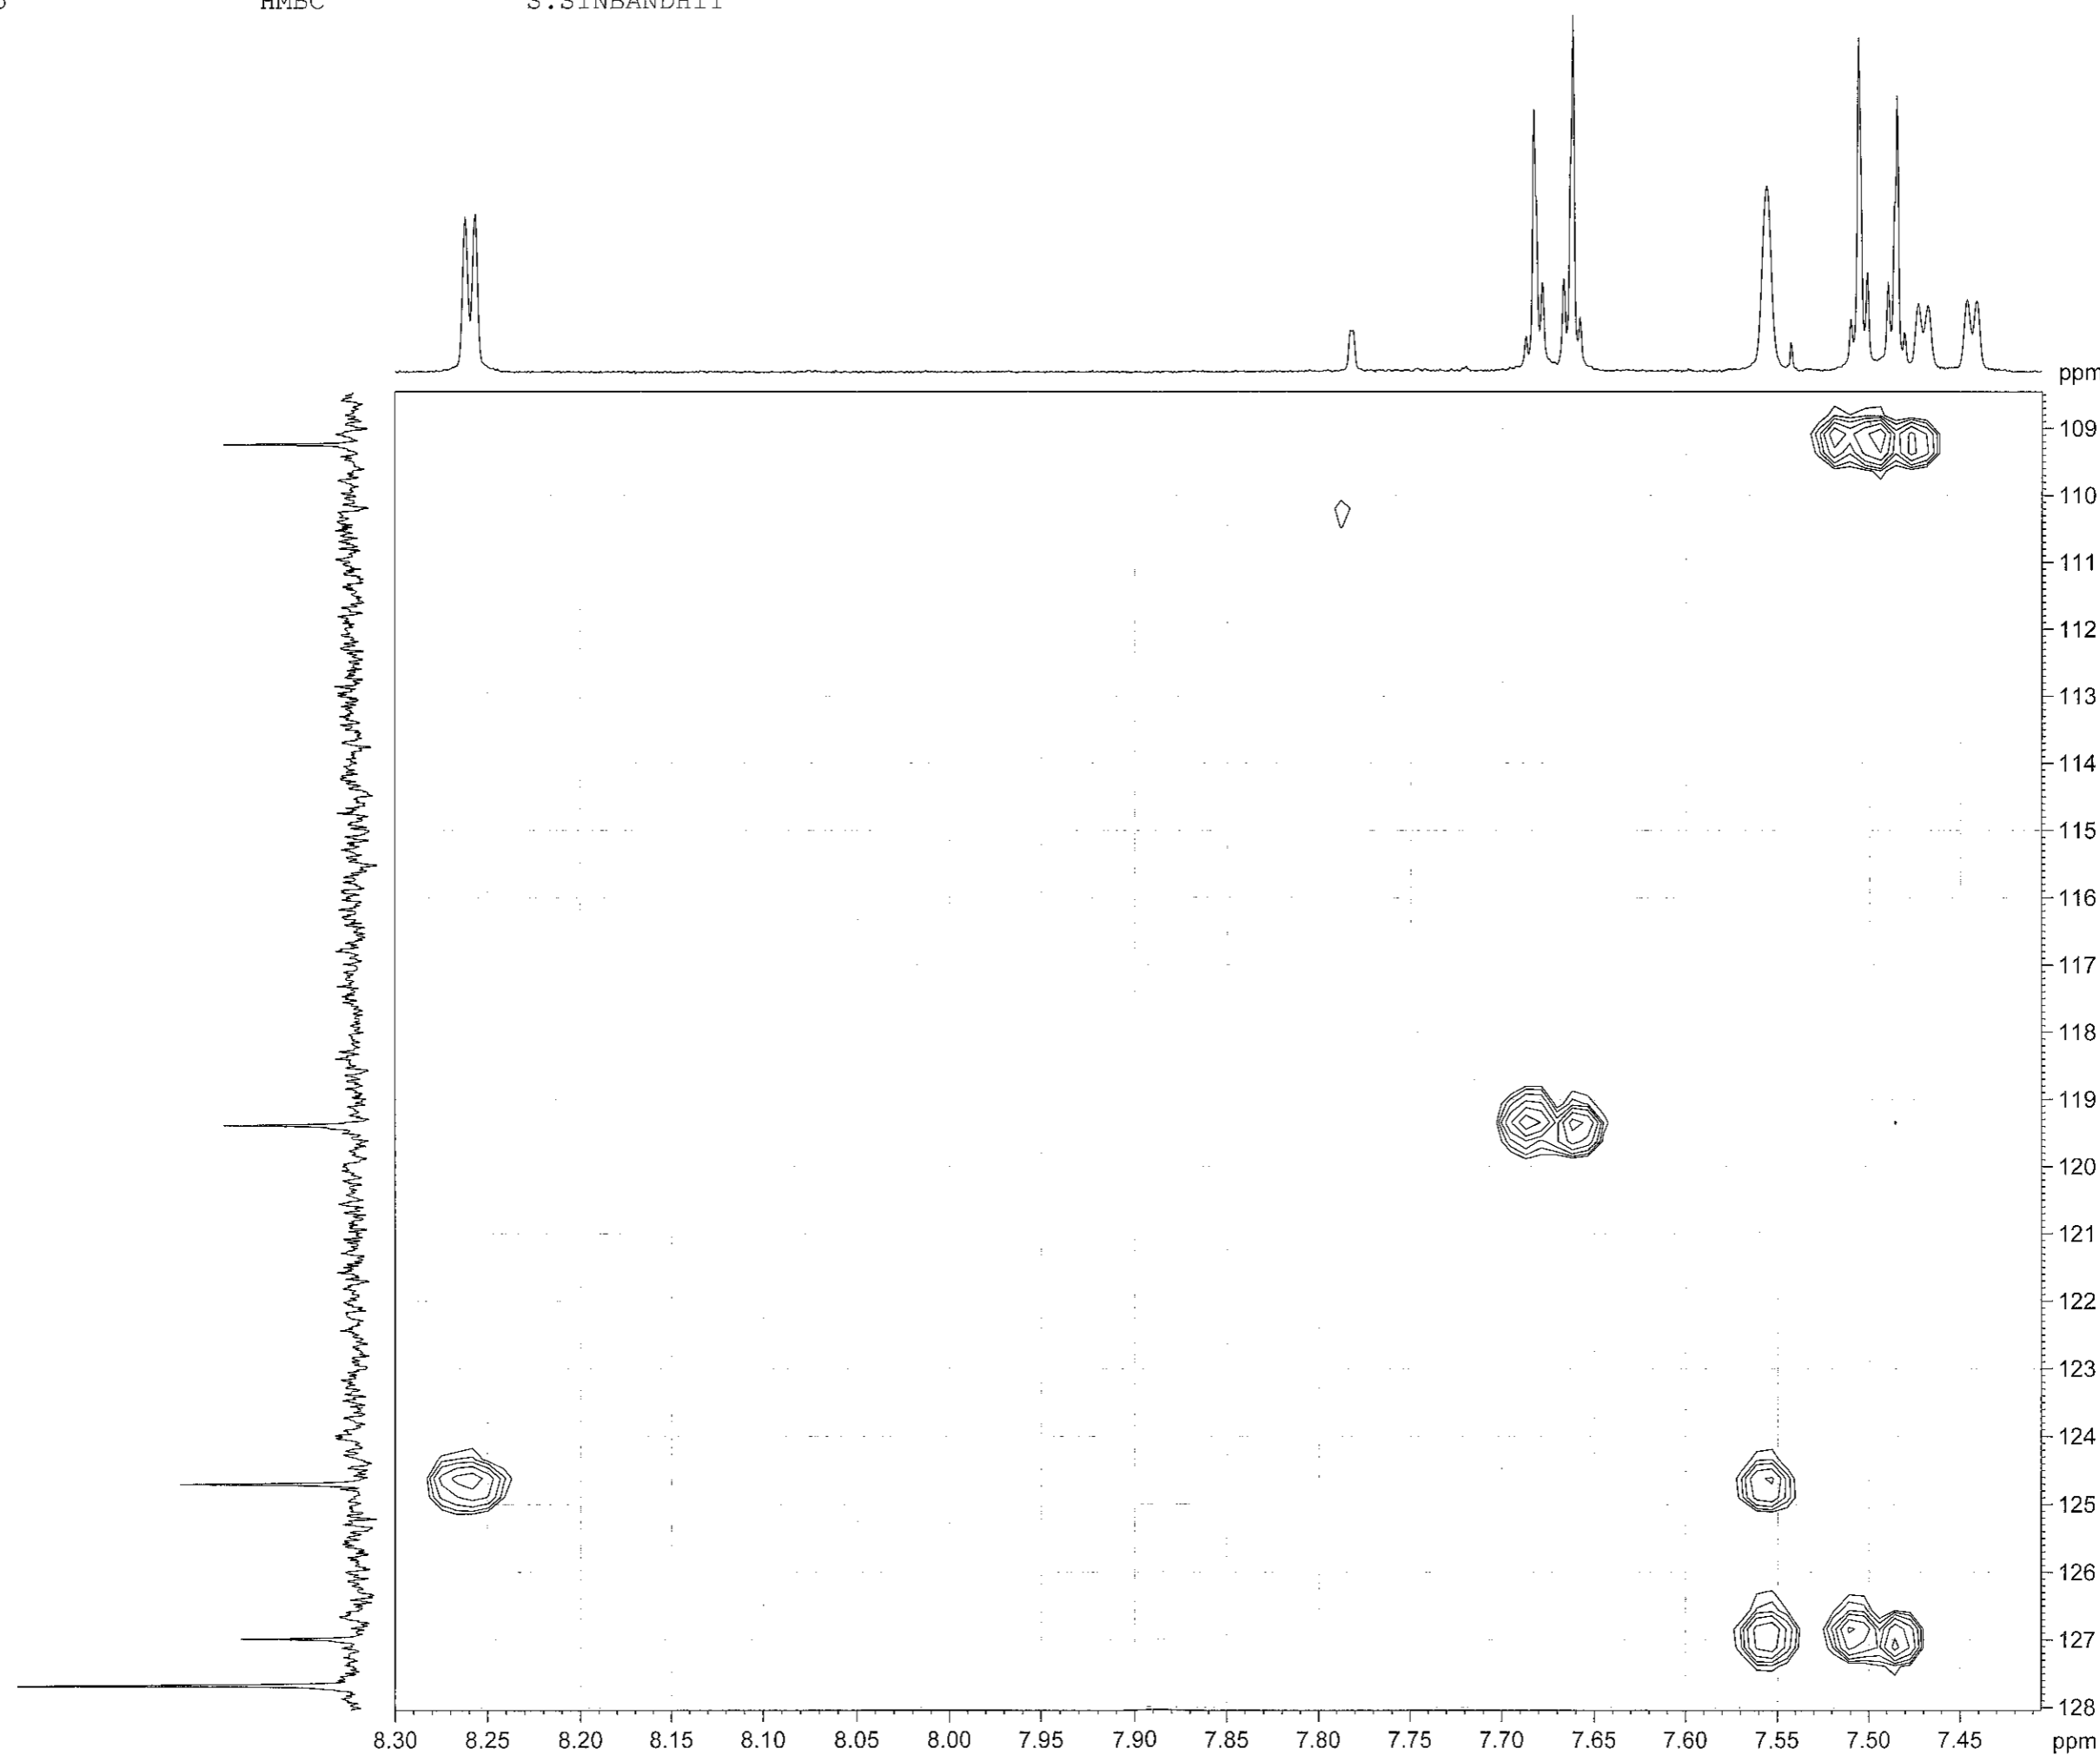

```
NAME          lq-398-p
EXPNO         3
PROCNO       1
Date_        20121030
Time_        17.34
INSTRUM      spect
PROBHD       5 mm PABBO BB-
PULPROG      hmbcgp1pndqf
TD           2048
SOLVENT      CDC13
NS           40
DS           16
SWH          3440.367 Hz
FIDRES       1.679867 Hz
AQ           0.2976927 sec
RG           2050
DW           145.333 usec
DE           6.50 usec
TE           299.7 K
CNST2        164.0000000
CNST13       6.3000002
D0           0.0000300 sec
D1           1.79999995 sec
D2           0.00304878 sec
D6           0.07936507 sec
D16          0.00010000 sec
IN0          0.00003500 sec

===== CHANNEL f1 =====
NUC1          1H
P1            10.00 usec
P2            20.00 usec
PL1           -4.80 dB
PL1W          24.27448273 W
SFO1          400.1320007 MHz

===== CHANNEL f2 =====
NUC2          13C
P3            9.00 usec
PL2           -3.10 dB
PL2W          66.67198181 W
SFO2          100.6208180 MHz

===== GRADIENT CHANNEL =====
GPNAM1       SINE.100
GPNAM2       SINE.100
GPNAM3       SINE.100
GPZ1         50.00 %
GPZ2         30.00 %
GPZ3         40.10 %
P16          1000.00 usec
ND0          2
TD           320
SFO1         100.6208 MHz
FIDRES       44.650490 Hz
SW           142.000 ppm
FrMODE       QF
SI           1024
SF           400.1299982 MHz
WDW          QSINE
SSB          4
LB           0.00 Hz
GB           0
PC           1.40
SI           512
MC2          QF
SF           100.6127590 MHz
WDW          QSINE
SSB          4
LB           0.00 Hz
GB           0
```

lq-398-p

HMBC

S. SINBANDHIT

NAME lq-398-p  
EXPNO 3  
PROCNO 1  
Date\_ 20121030  
Time 17.34  
INSTRUM spect  
PROBHD 5 mm PABBO BB-  
PULPROG hmbcgp1pndqf  
TD 2048  
SOLVENT CDC13  
NS 40  
DS 16  
SWH 3440.367 Hz  
FIDRES 1.679867 Hz  
AQ 0.2976927 sec  
RG 2050  
DW 145.333 usec  
DE 6.50 usec  
TE 299.7 K  
CNST2 164.0000000  
CNST13 6.3000002  
D0 0.00000300 sec  
D1 1.79999995 sec  
D2 0.00304878 sec  
D6 0.07936507 sec  
D16 0.00010000 sec  
INO 0.00003500 sec

==== CHANNEL f1 =====  
NUC1 1H  
P1 10.00 usec  
P2 20.00 usec  
PL1 -4.80 dB  
PL1W 24.27448273 W  
SFO1 400.1320007 MHz

==== CHANNEL f2 =====  
NUC2 13C  
P3 9.00 usec  
PL2 -3.10 dB  
PL2W 66.67198181 W  
SFO2 100.6208180 MHz

==== GRADIENT CHANNEL =====  
GPNAM1 SINE.100  
GPNAM2 SINE.100  
GPNAM3 SINE.100  
GPZ1 50.00 %  
GPZ2 30.00 %  
GPZ3 40.10 %  
P16 1000.00 usec  
ND0 2  
TD 320  
SFO1 100.6208 MHz  
FIDRES 44.650490 Hz  
SW 142.000 ppm  
FnMODE QF  
SI 1024  
SF 400.1299982 MHz  
WDW QSINE  
SSB 4  
LB 0.00 Hz  
GB 0  
PC 1.40  
SI 512  
MC2 QF  
SF 100.6127590 MHz  
WDW QSINE  
SSB 4  
LB 0.00 Hz  
GB 0

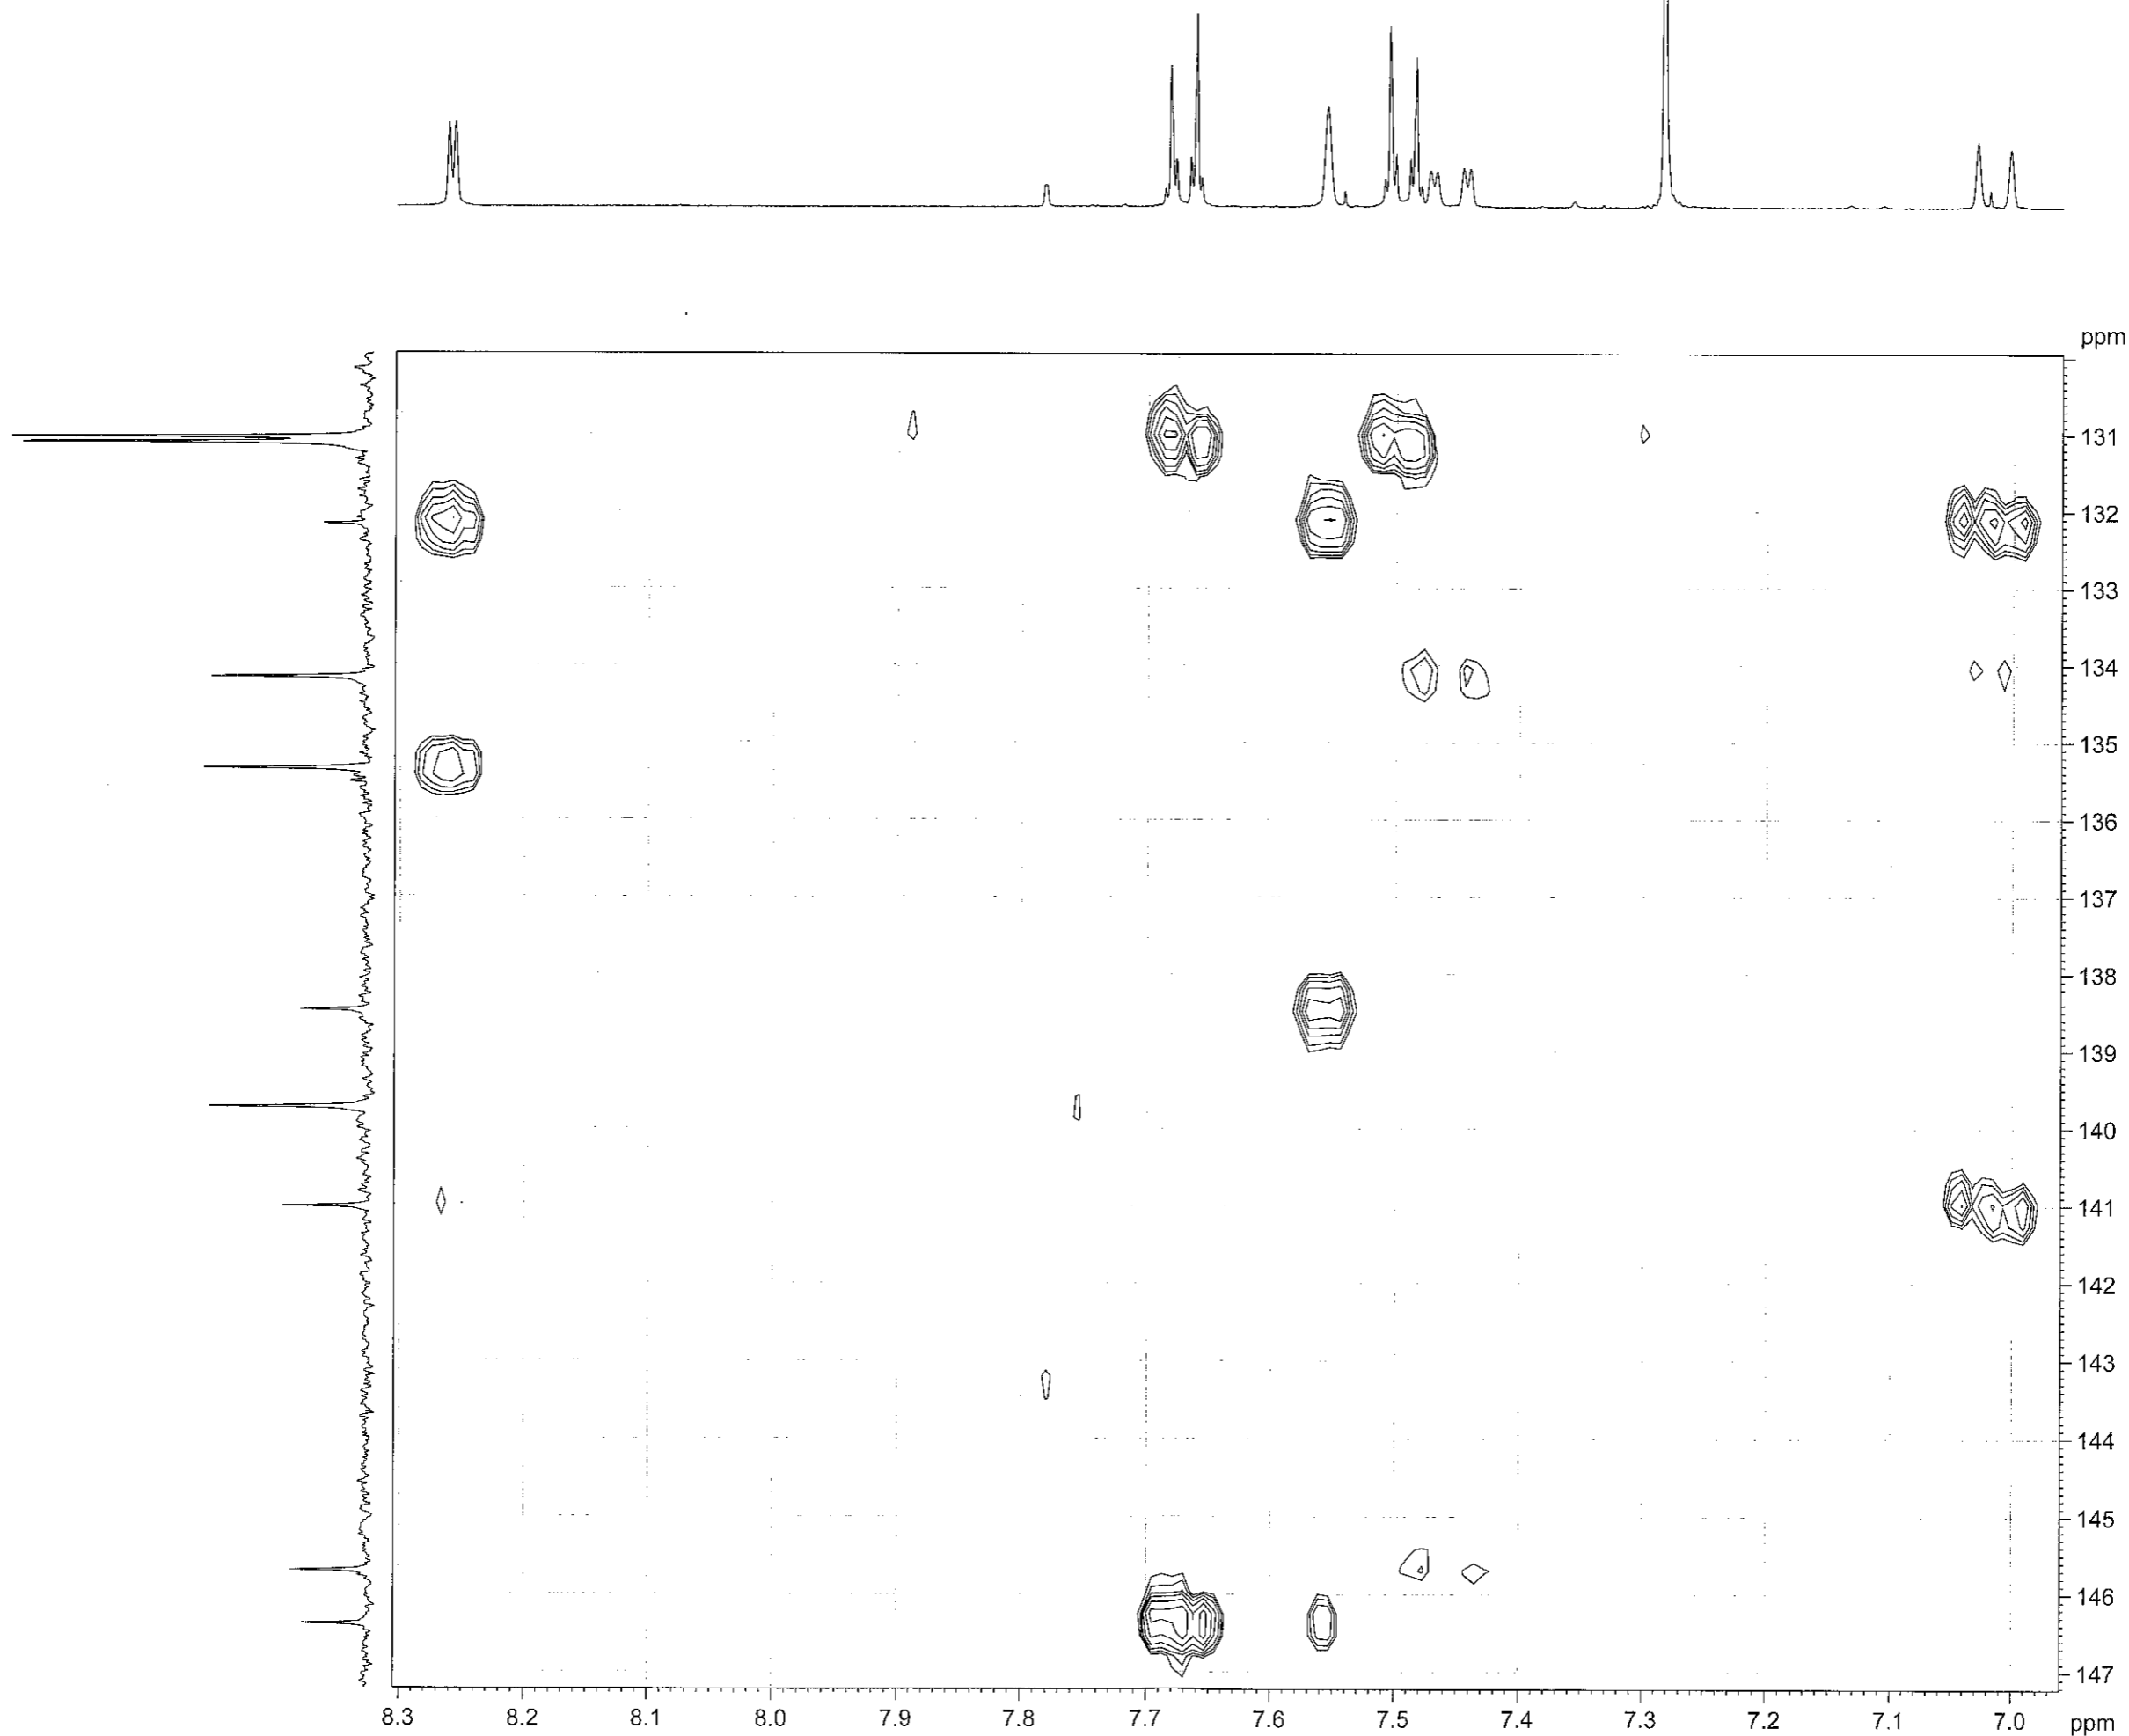



1q-398-p

HMQC

S. SINBANDHIT

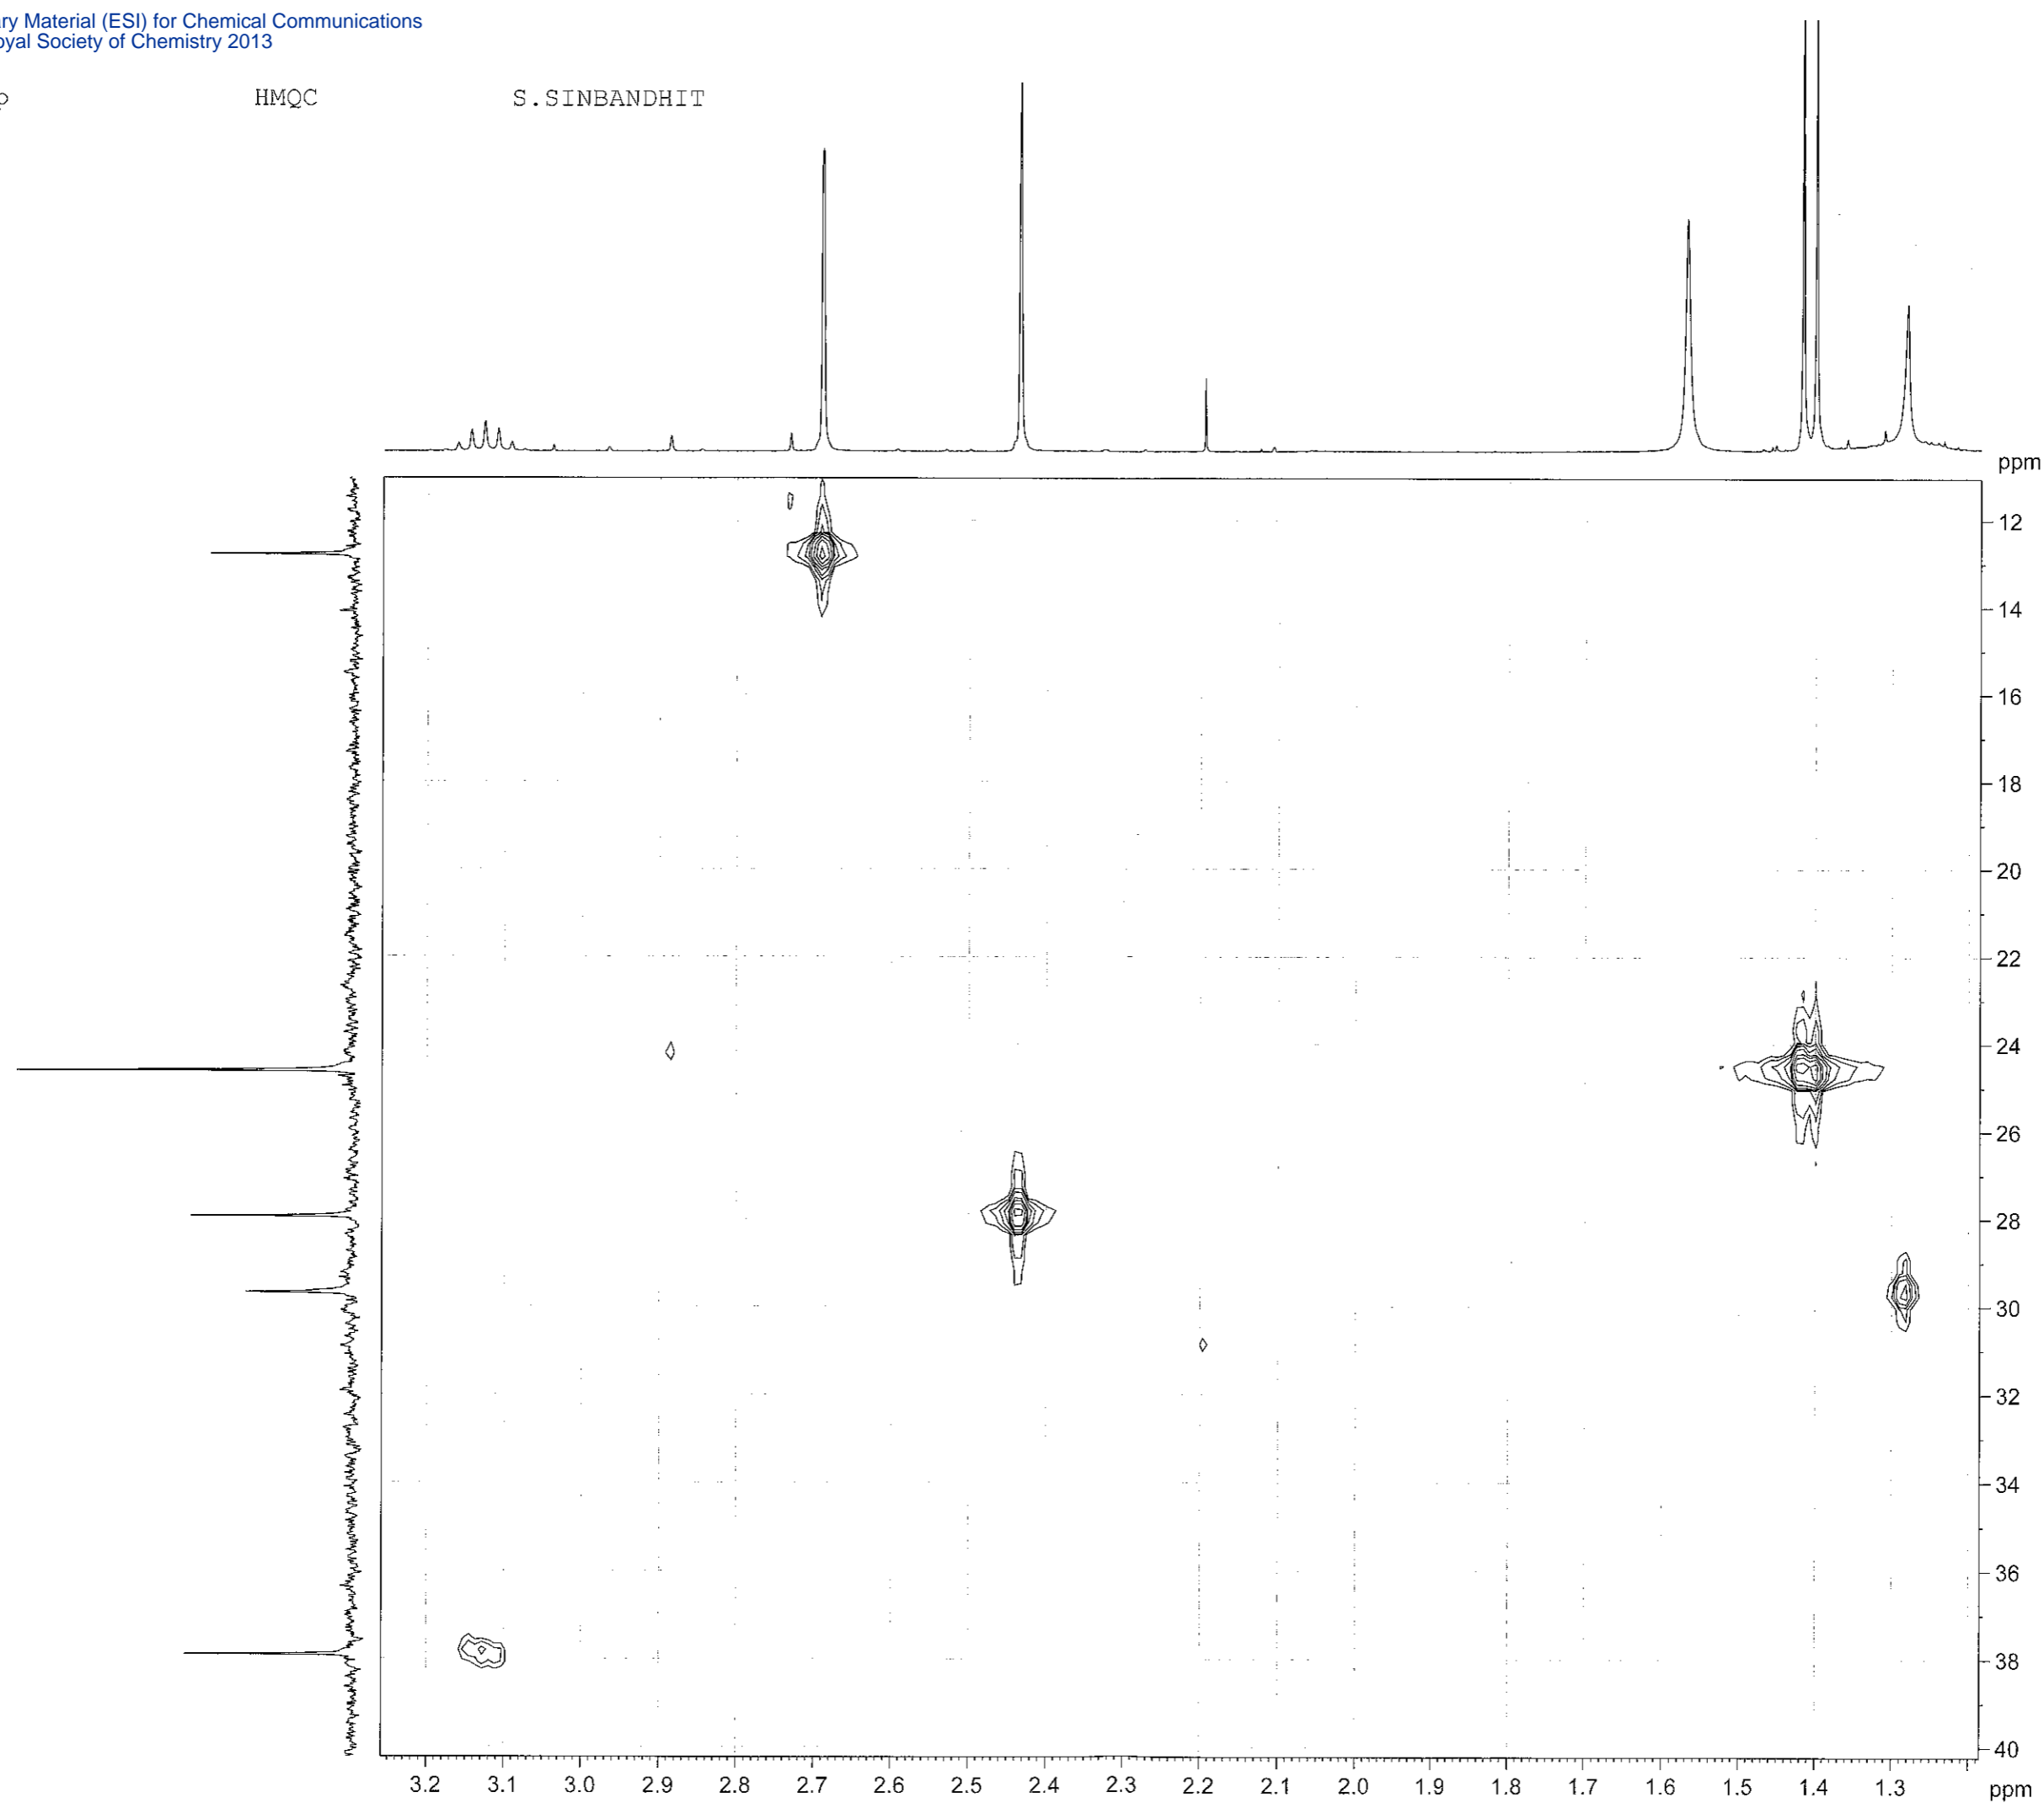

```
NAME          1q-398-p
EXPNO         2
PROCNO        1
Date_         20121030
Time          11.26
INSTRUM       spect
PROBHD        5 mm PABBO BB-
PULPROG       hmqcpgpf
TD            2048
SOLVENT       CDC13
NS            32
DS            16
SWH           3440.367 Hz
FIDRES        1.679867 Hz
AQ            0.2976927 sec
RG            2050
DW            145.333 usec
DE            6.50 usec
TE            298.7 K
CNST2         144.0000000
D0            0.00000300 sec
D1            1.79999995 sec
D2            0.00347222 sec
D12           0.00002000 sec
D13           0.00000400 sec
D16           0.00010000 sec
IN0           0.00003500 sec
```

```
===== CHANNEL f1 =====
NUC1           1H
P1             10.00 usec
P2             20.00 usec
PL1            -4.80 dB
PL1W           24.27448273 W
SFO1           400.1320007 MHz
```

```
===== CHANNEL f2 =====
CPDPRG2        garp
NUC2           13C
P3             9.00 usec
PCPD2          80.00 usec
PL2            -3.10 dB
PL12           15.50 dB
PL2W           66.67198181 W
PL12W          0.92032951 W
SFO2           100.6208180 MHz
```

```
===== GRADIENT CHANNEL =====
GFNAM1         SINE.100
GFNAM2         SINE.100
GFNAM3         SINE.100
GPZ1           50.00 %
GPZ2           30.00 %
GPZ3           40.10 %
P16            1000.00 usec
ND0            2
TD             320
SFO1           100.6208 MHz
FIDRES         44.650490 Hz
SW             142.000 ppm
FhMODE         QF
SI             1024
SF             400.1299980 MHz
WDW            QSINE
SSB            4
LB             0.00 Hz
GB             0
PC             1.40
SI             512
MC2            QF
SF             100.6127590 MHz
WDW            QSINE
SSB            4
LB             0.00 Hz
GB             0
```

1q-398-p

HMQC

S.SINBANDHIT

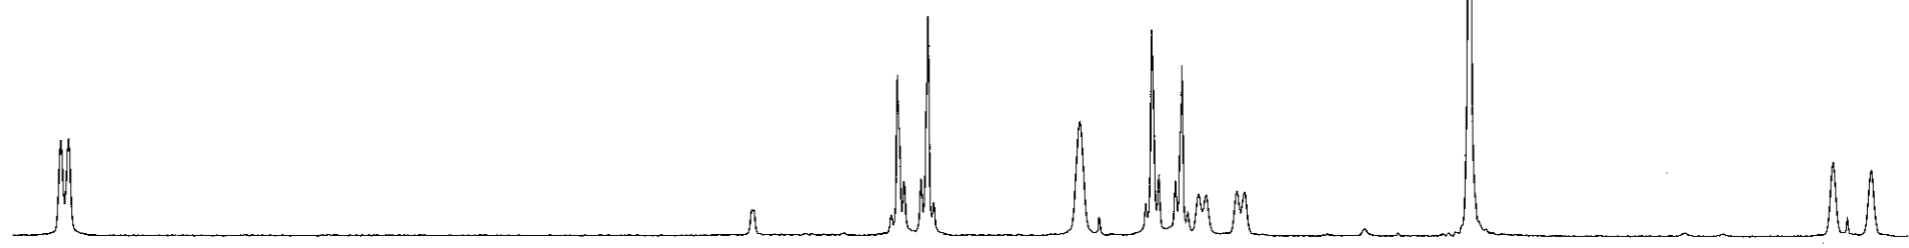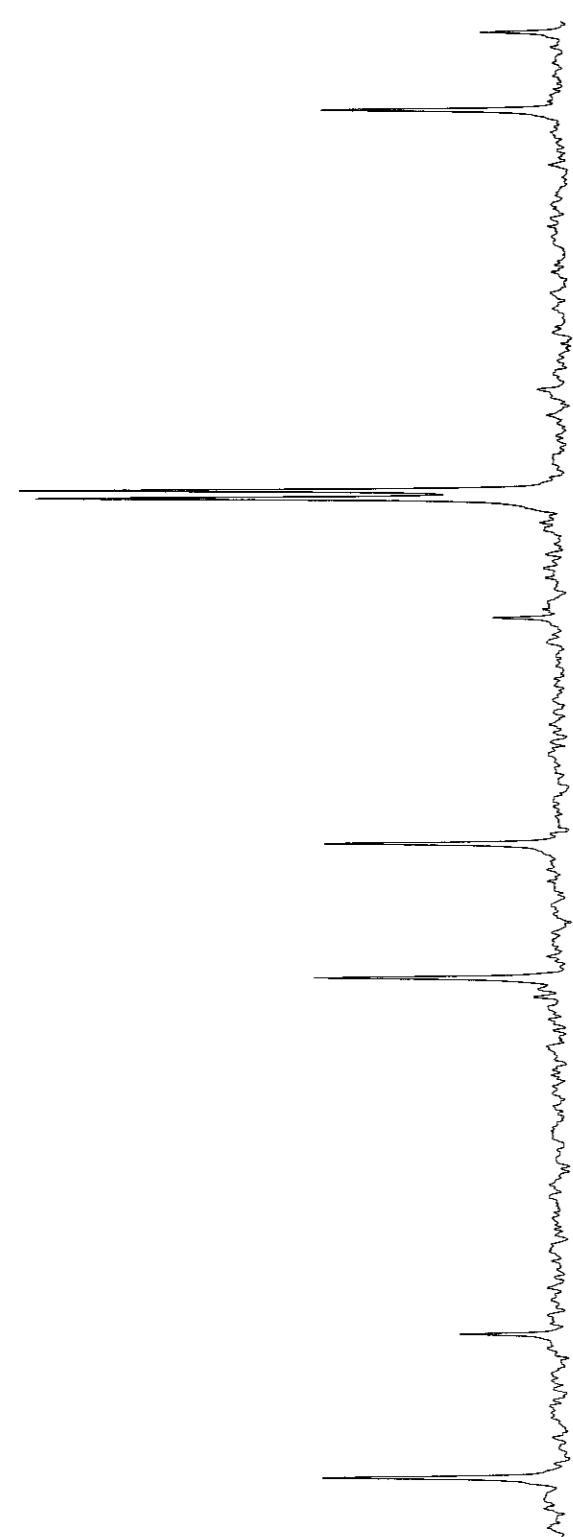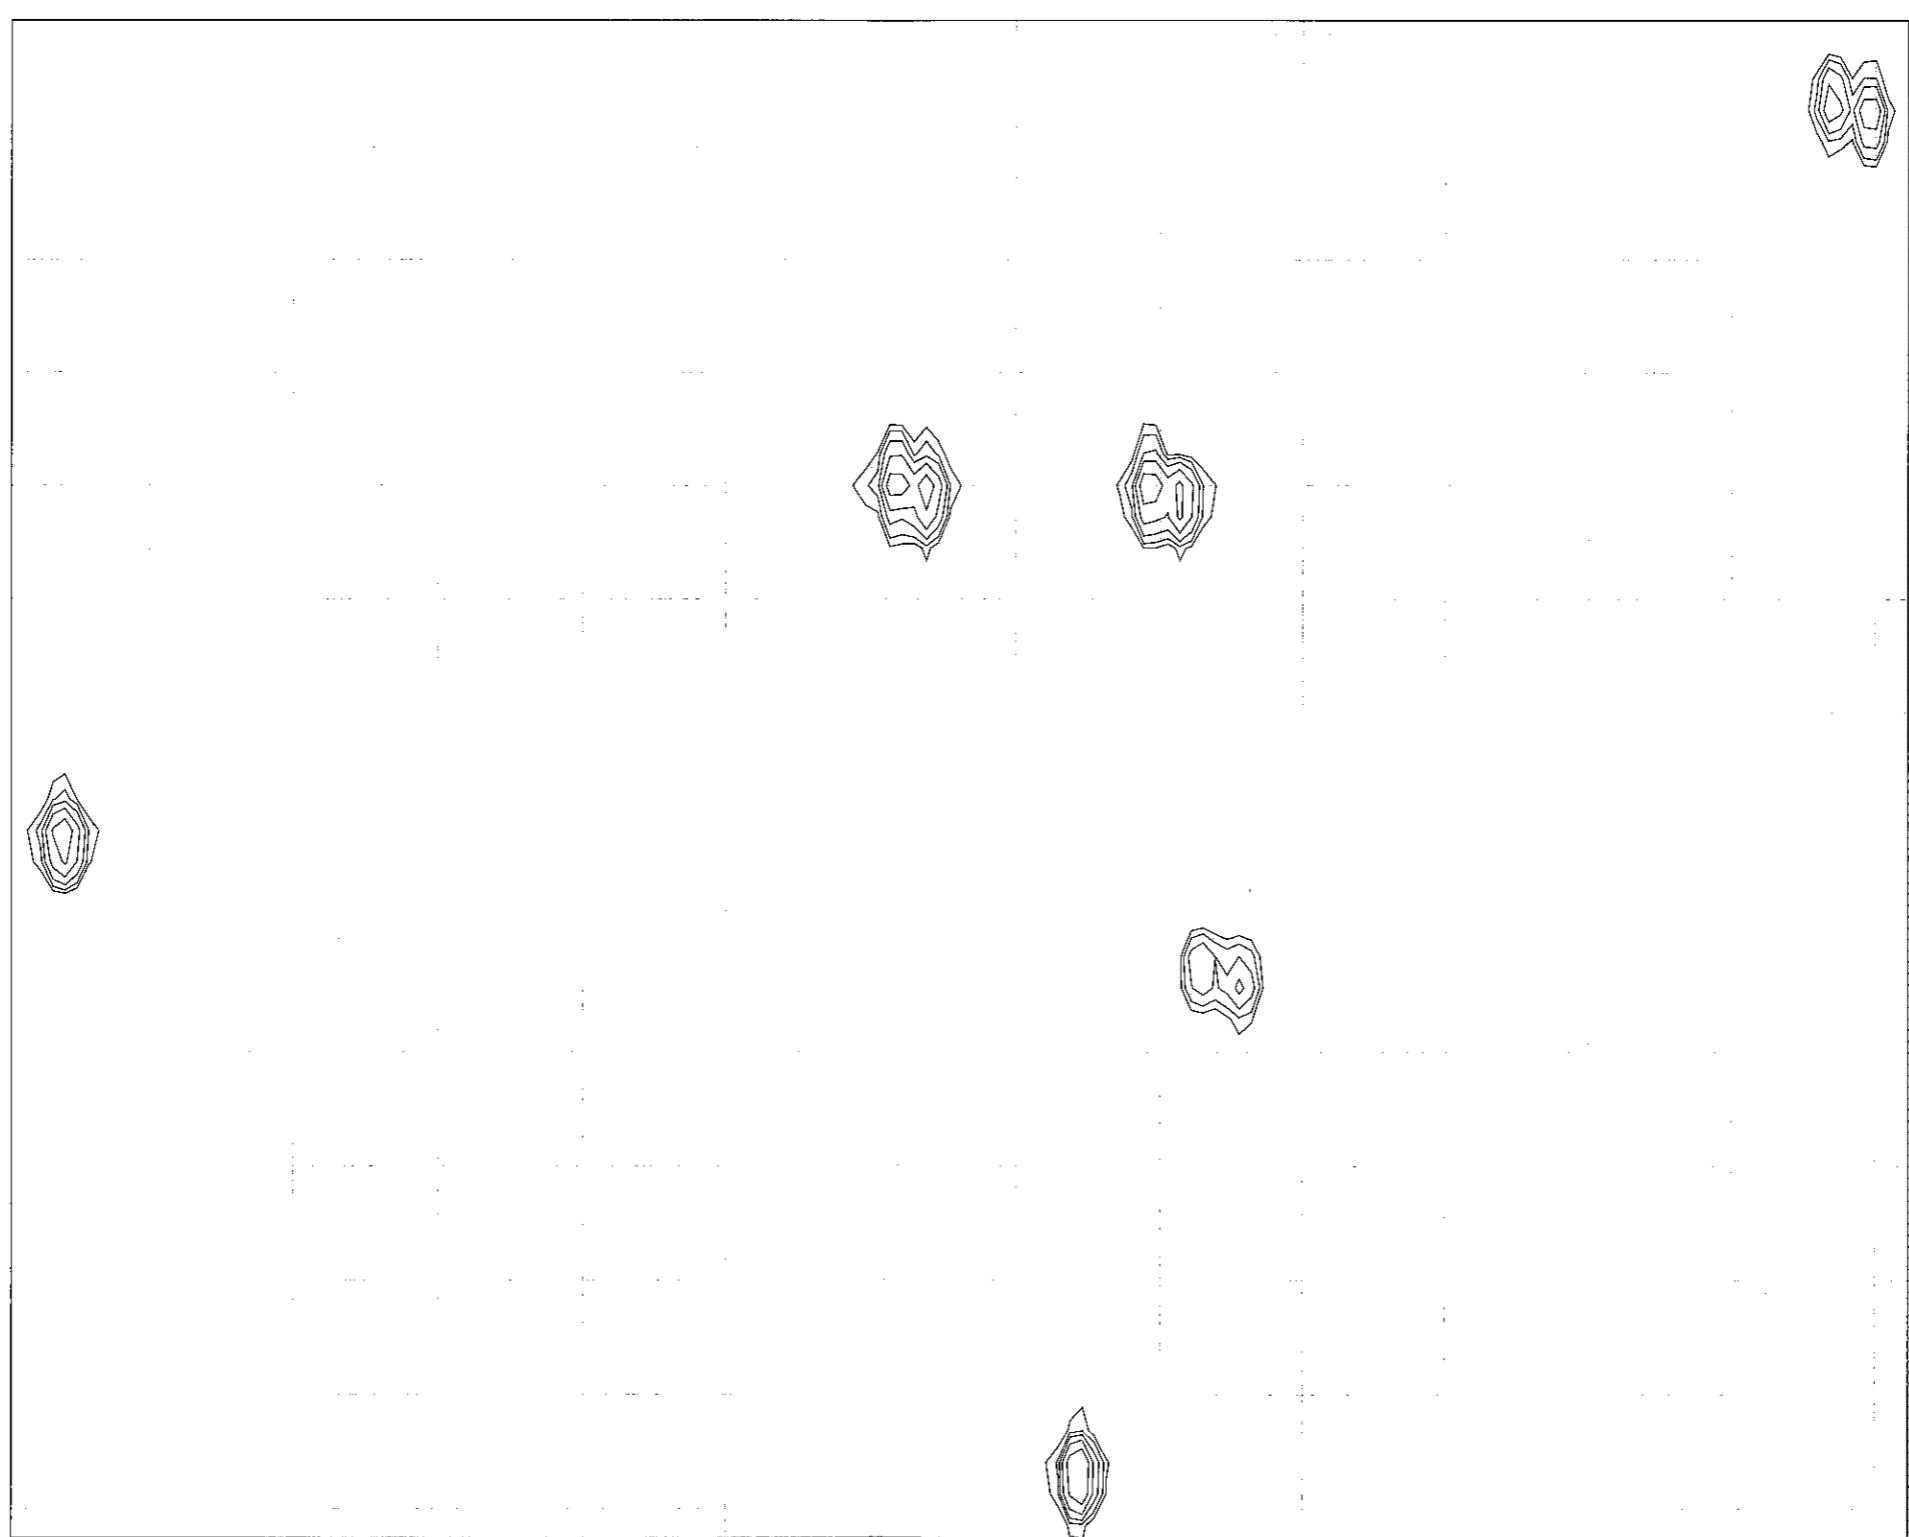

```
NAME          1q-398-p
EXPNO         2
PROCNO       1
Date_        20121030
Time         11.26
INSTRUM      spect
PROBHD       5 mm PABBO BB-
PULPROG      hmqcgpqf
TD           2048
SOLVENT      CDC13
NS           32
DS           16
SWH          3440.367 Hz
FIDRES       1.679867 Hz
AQ           0.2976927 sec
RG           2050
DW           145.333 usec
DE           6.50 usec
TE           298.7 K
CNST2        144.0000000
D0           0.00000300 sec
D1           1.79999995 sec
D2           0.00347222 sec
D12          0.00002000 sec
D13          0.00000400 sec
D16          0.00010000 sec
IN0          0.00003500 sec
```

```
===== CHANNEL f1 =====
NUC1          1H
P1            10.00 usec
P2            20.00 usec
PL1           -4.80 dB
PL1W          24.27448273 W
SFO1          400.1320007 MHz
```

```
===== CHANNEL f2 =====
CPDPRG2       garp
NUC2          13C
P3            9.00 usec
PCPD2         80.00 usec
PL2           -3.10 dB
PL12          15.50 dB
PL2W          66.67198181 W
PL12W         0.92032951 W
SFO2          100.6208180 MHz
```

```
===== GRADIENT CHANNEL =====
GPNAM1        SINE.100
GPNAM2        SINE.100
GPNAM3        SINE.100
GPZ1          50.00 %
GPZ2          30.00 %
GPZ3          40.10 %
P16           1000.00 usec
NDO           2
TD            320
SFO1          100.6208 MHz
FIDRES        44.650490 Hz
SW            142.000 ppm
FnMODE        QF
SI            1024
SF            400.1299980 MHz
WDW           QSINE
SSB           4
LB            0.00 Hz
GB            0
PC            1.40
SI            512
MC2           QF
SF            100.6127590 MHz
WDW           QSINE
SSB           4
LB            0.00 Hz
GB            0
```

lq499-p1

<sup>1</sup>H

S. SINBANDHIT

8.297  
8.292  
7.637  
7.636  
7.632  
7.621  
7.616  
7.610  
7.506  
7.500  
7.495  
7.484  
7.480  
7.479  
7.468  
7.463  
7.442  
7.437  
7.357  
7.284  
7.115  
7.088

6b

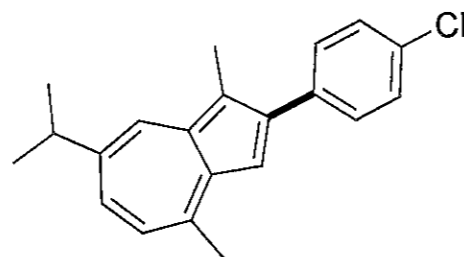

6b

3.179  
3.161  
3.144  
3.127  
3.110  
2.889  
2.736

1.429  
1.422  
1.419  
1.412  
1.405

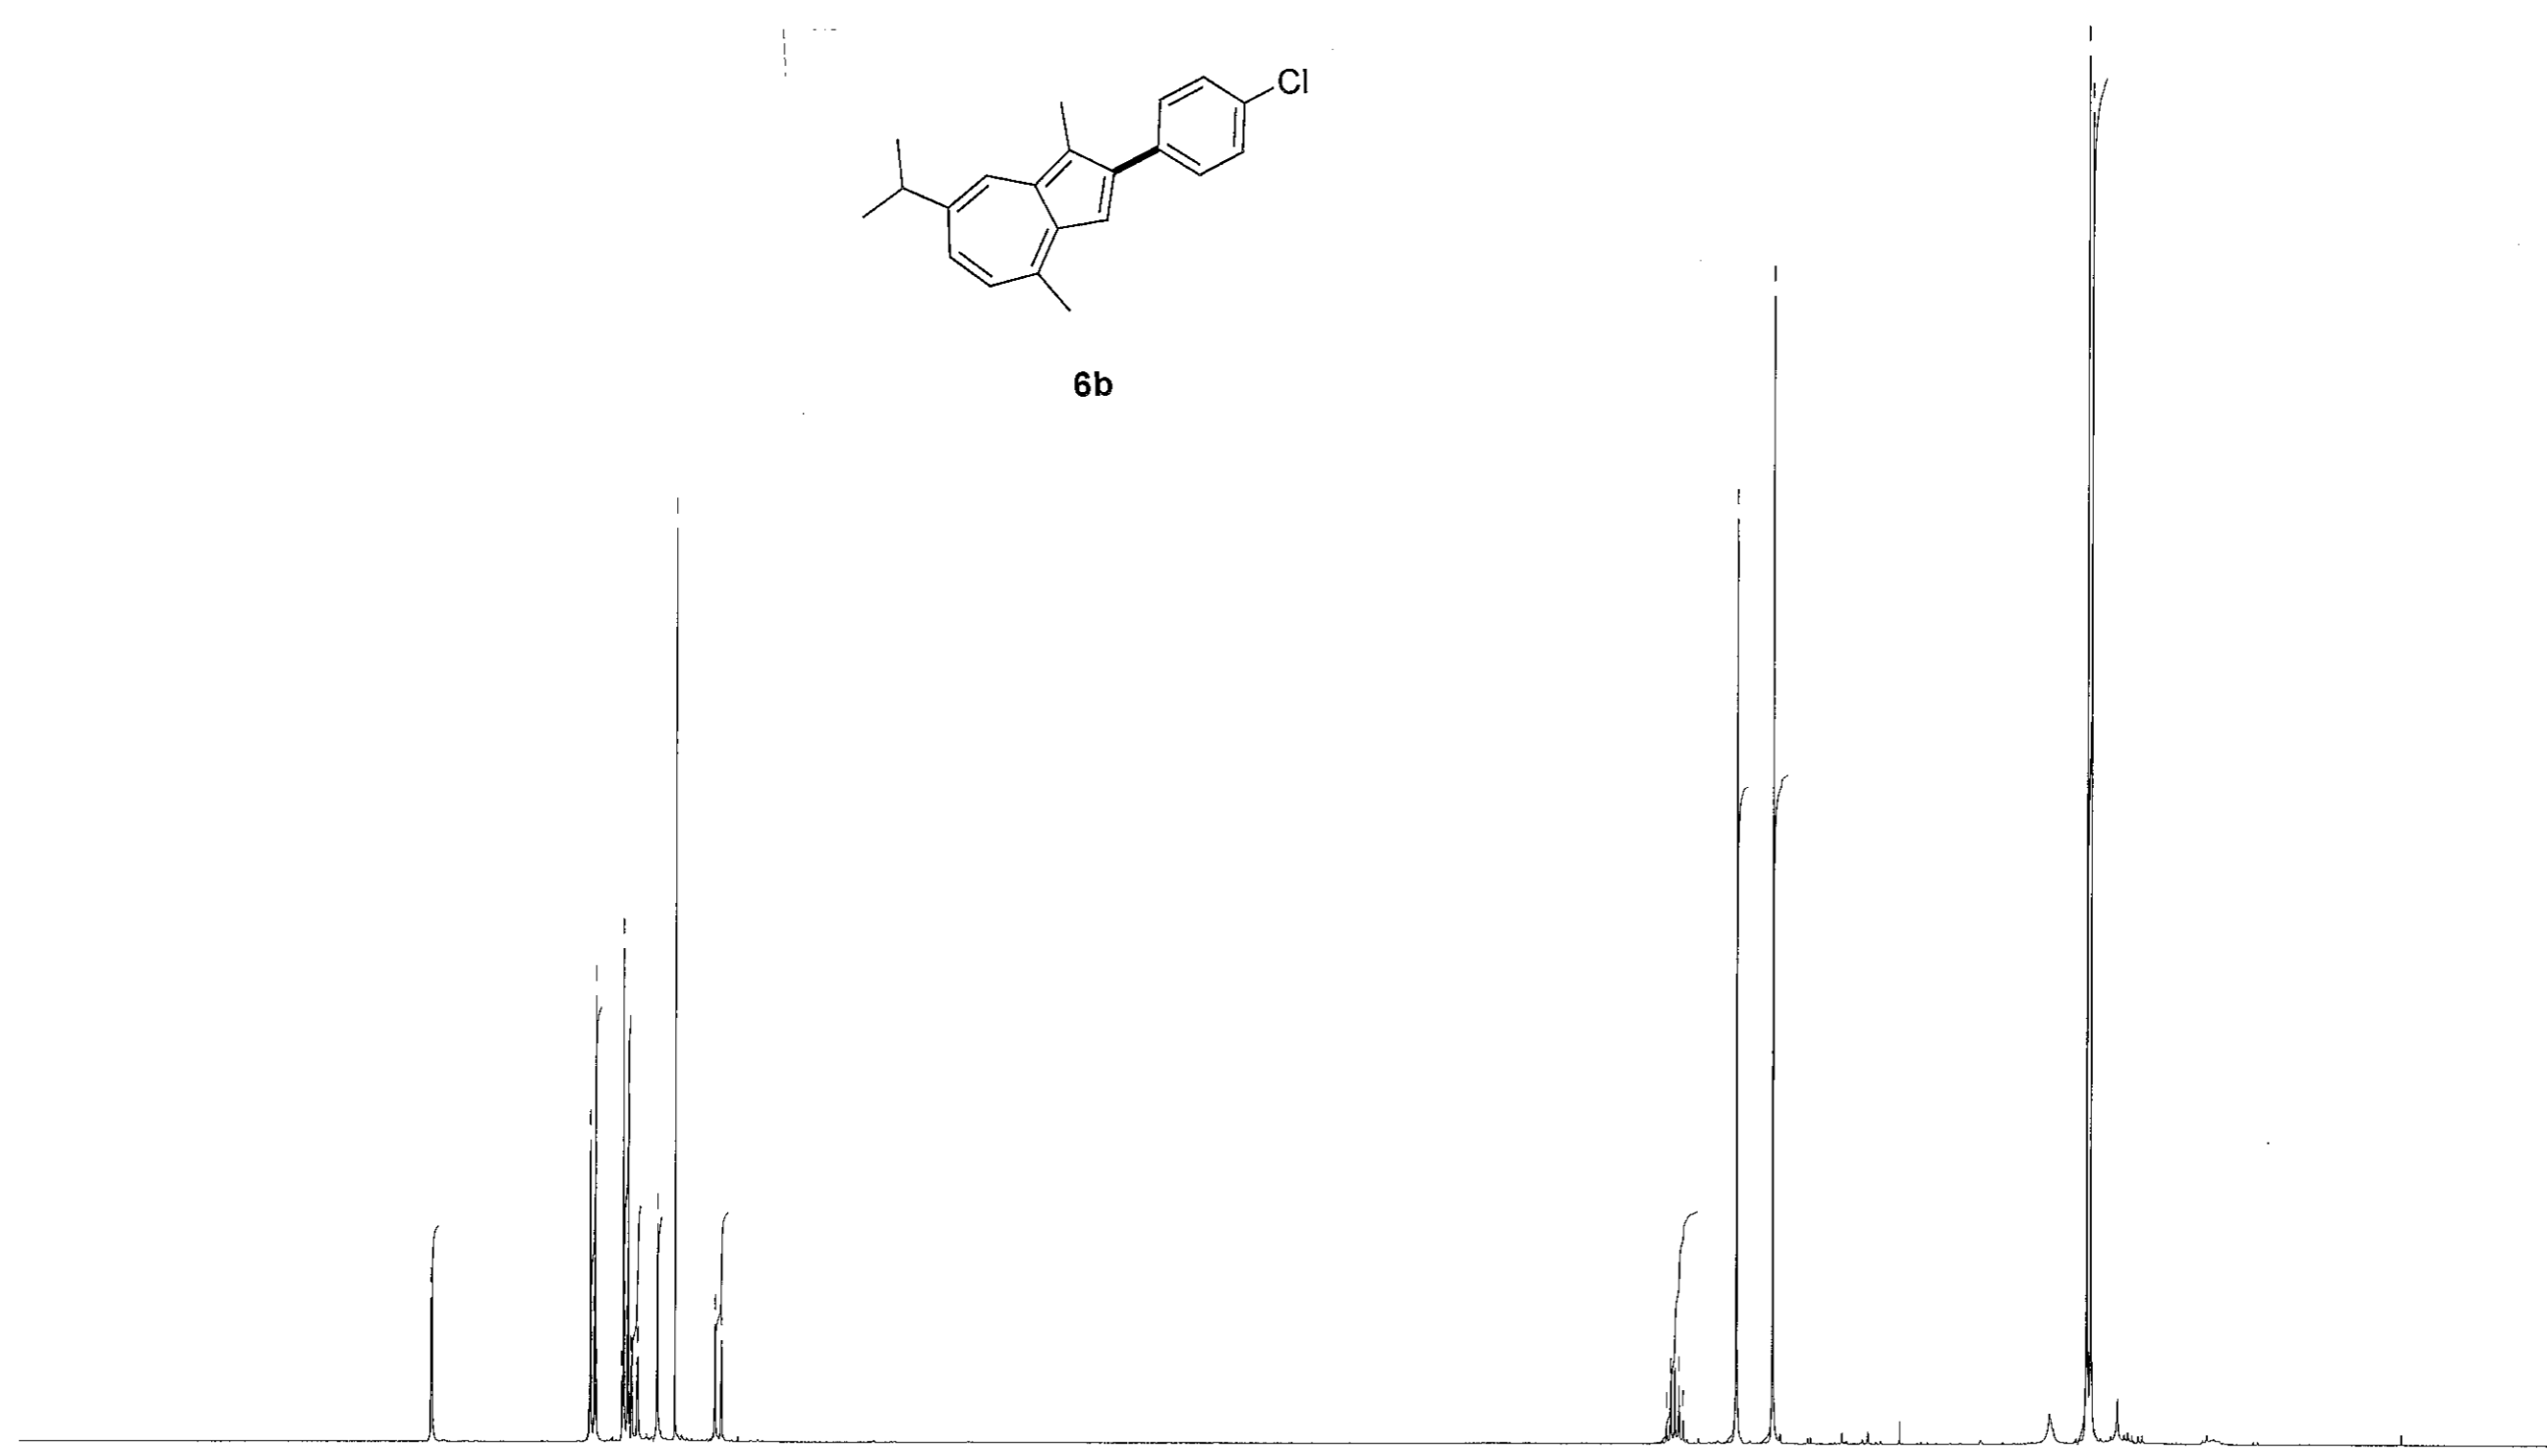

1.00

2.03

1.99

1.10

1.04

1.06

1.08

3.07

3.13

6.40

NAME lq499-p1  
EXPNO 1  
PROCNO 1  
Date\_ 20121217  
Time\_ 16.59  
INSTRUM spect  
PROBHD 5 mm PABBO BB-  
PULPROG zg30  
TD 65536  
SOLVENT CDCl3  
NS 74  
DS 2  
SWH 6009.615 Hz  
FIDRES 0.091699 Hz  
AQ 5.4526453 sec  
RG 101  
DW 83.200 use  
DE 6.50 use  
TE 297.1 K  
D1 0.5000000 sec  
TD0 1

==== CHANNEL f1 =====  
NUC1 1H  
P1 10.00 use  
PL1 -4.80 dB  
PL1W 24.27448273 W  
SFO1 400 1326809 MHz  
SI 32768  
SF 400.1300000 MHz  
WDW no  
SSB 0  
LB 0.00 Hz  
GB 0  
PC 0.60

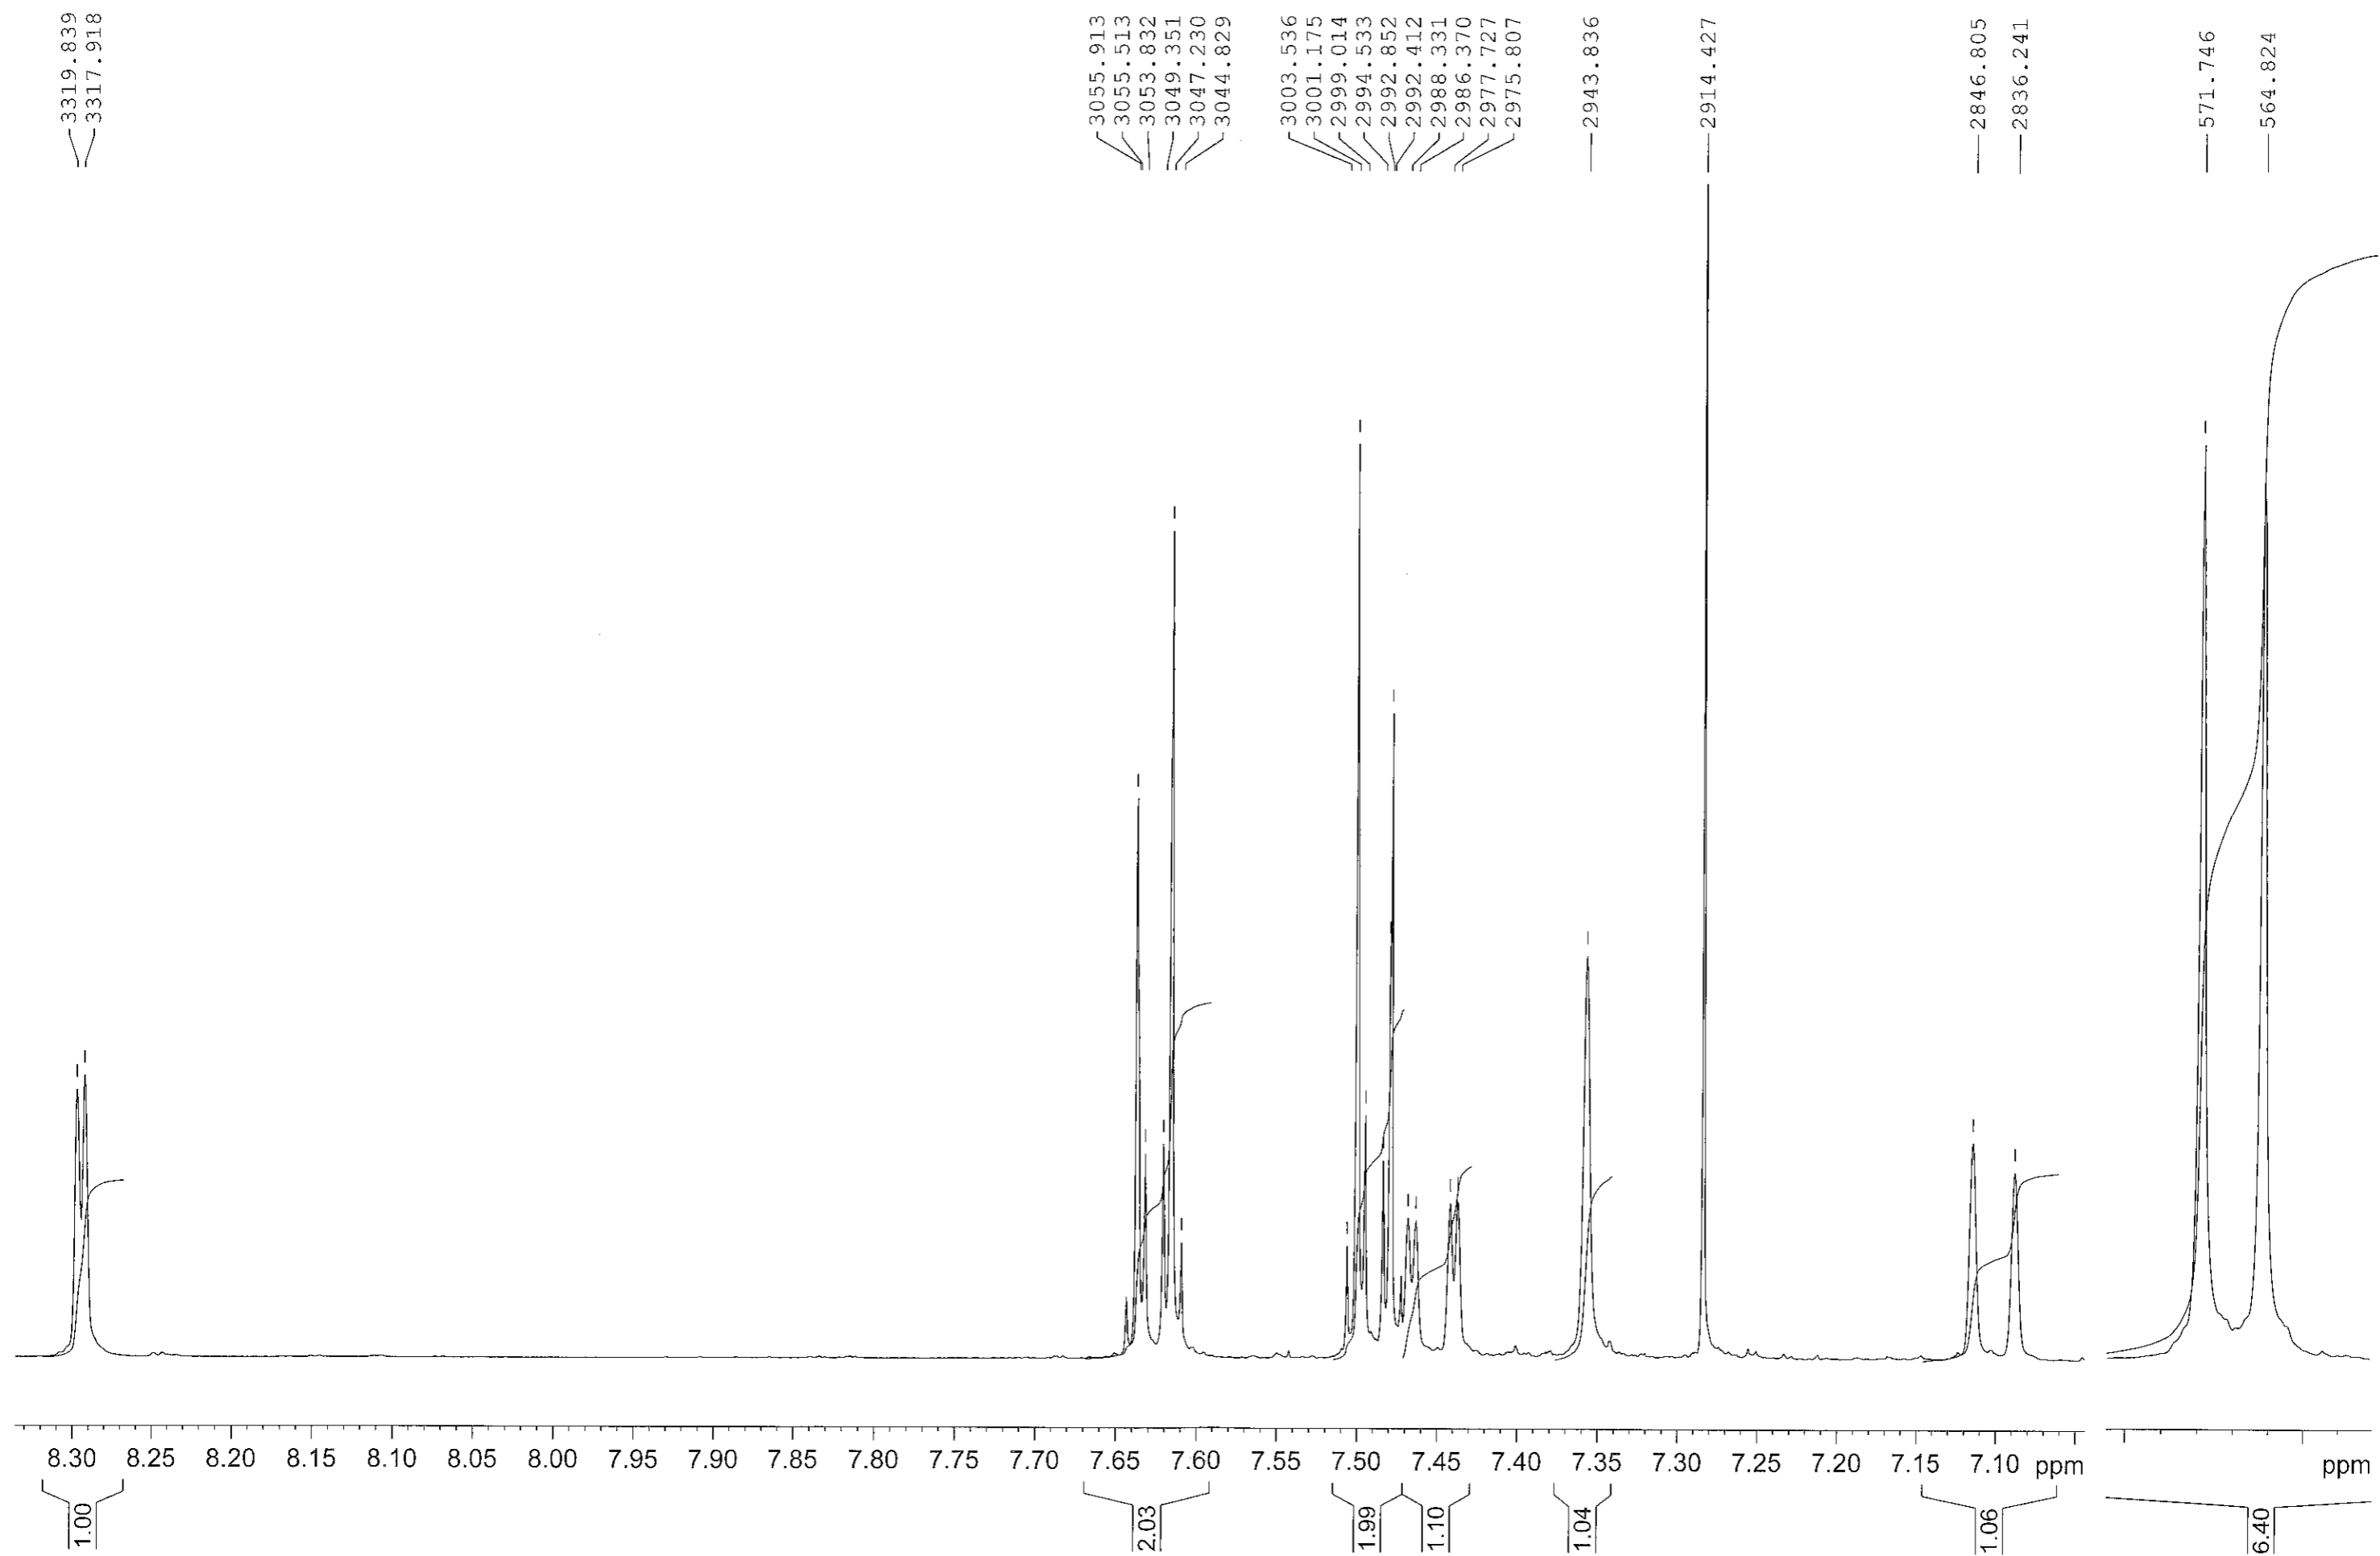

lq499-p1

13C

S. SINBANDHIT

NAME lq499-p1  
EXPNO 4  
PROCNO 1  
Date\_ 20121217  
Time\_ 17.09  
INSTRUM spect  
PROBHD 5 mm PABBO BB-  
PULPROG zgpg  
TD 65536  
SOLVENT CDCl3  
NS 853  
DS 2  
SWH 24038.461 Hz  
FIDRES 0.366798 Hz  
AQ 1.3631988 sec  
RG 2050  
DW 20.800 usec  
DE 10.00 usec  
TE 298.0 K  
D1 5.00000000 sec  
D11 0.03000000 sec  
TD0 1

146.84  
144.16  
141.11  
137.81  
136.95  
136.73  
134.70  
133.61  
133.05  
130.86  
128.56  
125.97  
121.29  
113.24

77.34  
77.23  
77.02  
76.71

38.43

29.72

24.80  
24.18

11.58

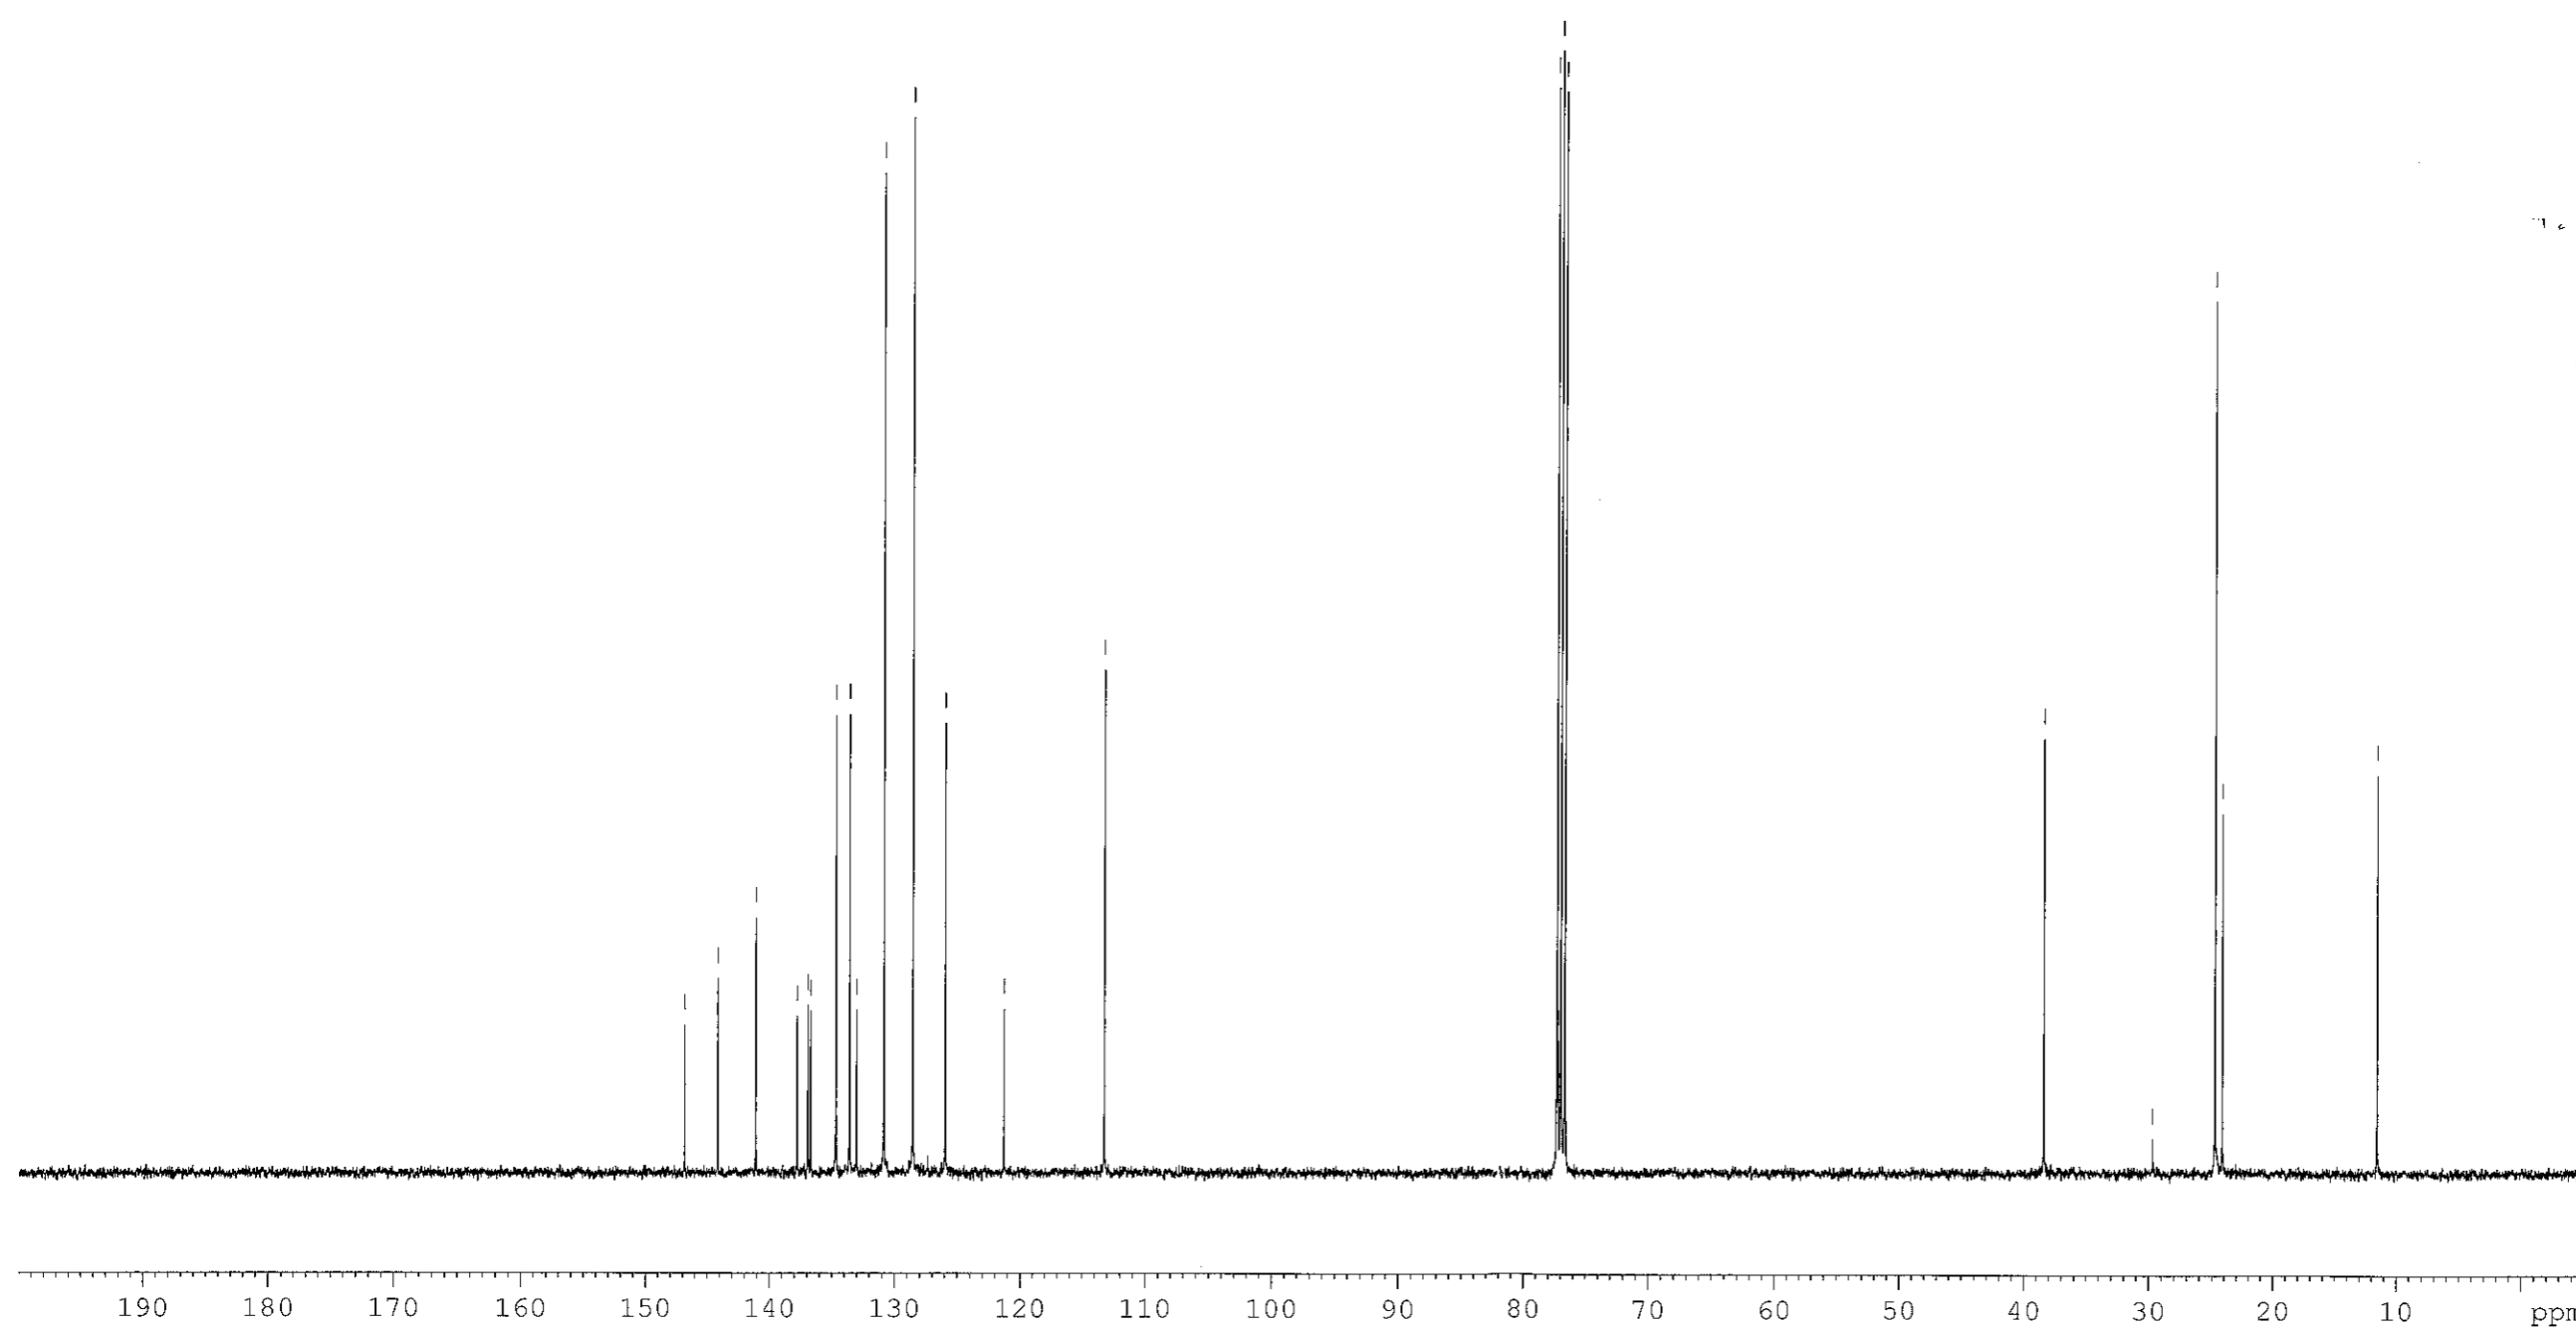

==== CHANNEL f1 =====  
NUC1 13C  
P1 6.70 usec  
PL1 -3.10 dB  
PL1W 66.67198181 W  
SFO1 100.6233333 MHZ

==== CHANNEL f2 =====  
CPDPRG2 waltz16  
NUC2 1H  
PCPD2 100.00 usec  
PL2 -4.80 dB  
PL12 15.20 dB  
PL13 15.20 dB  
PL2W 24.27448273 W  
PL12W 0.24274483 W  
PL13W 0.24274483 W  
SFO2 400.1316005 MHZ  
SI 32768  
SF 100.6127690 MHZ  
WDW EM  
SSB 0

1q499-p1

<sup>13</sup>C

S. SINBANDHIT

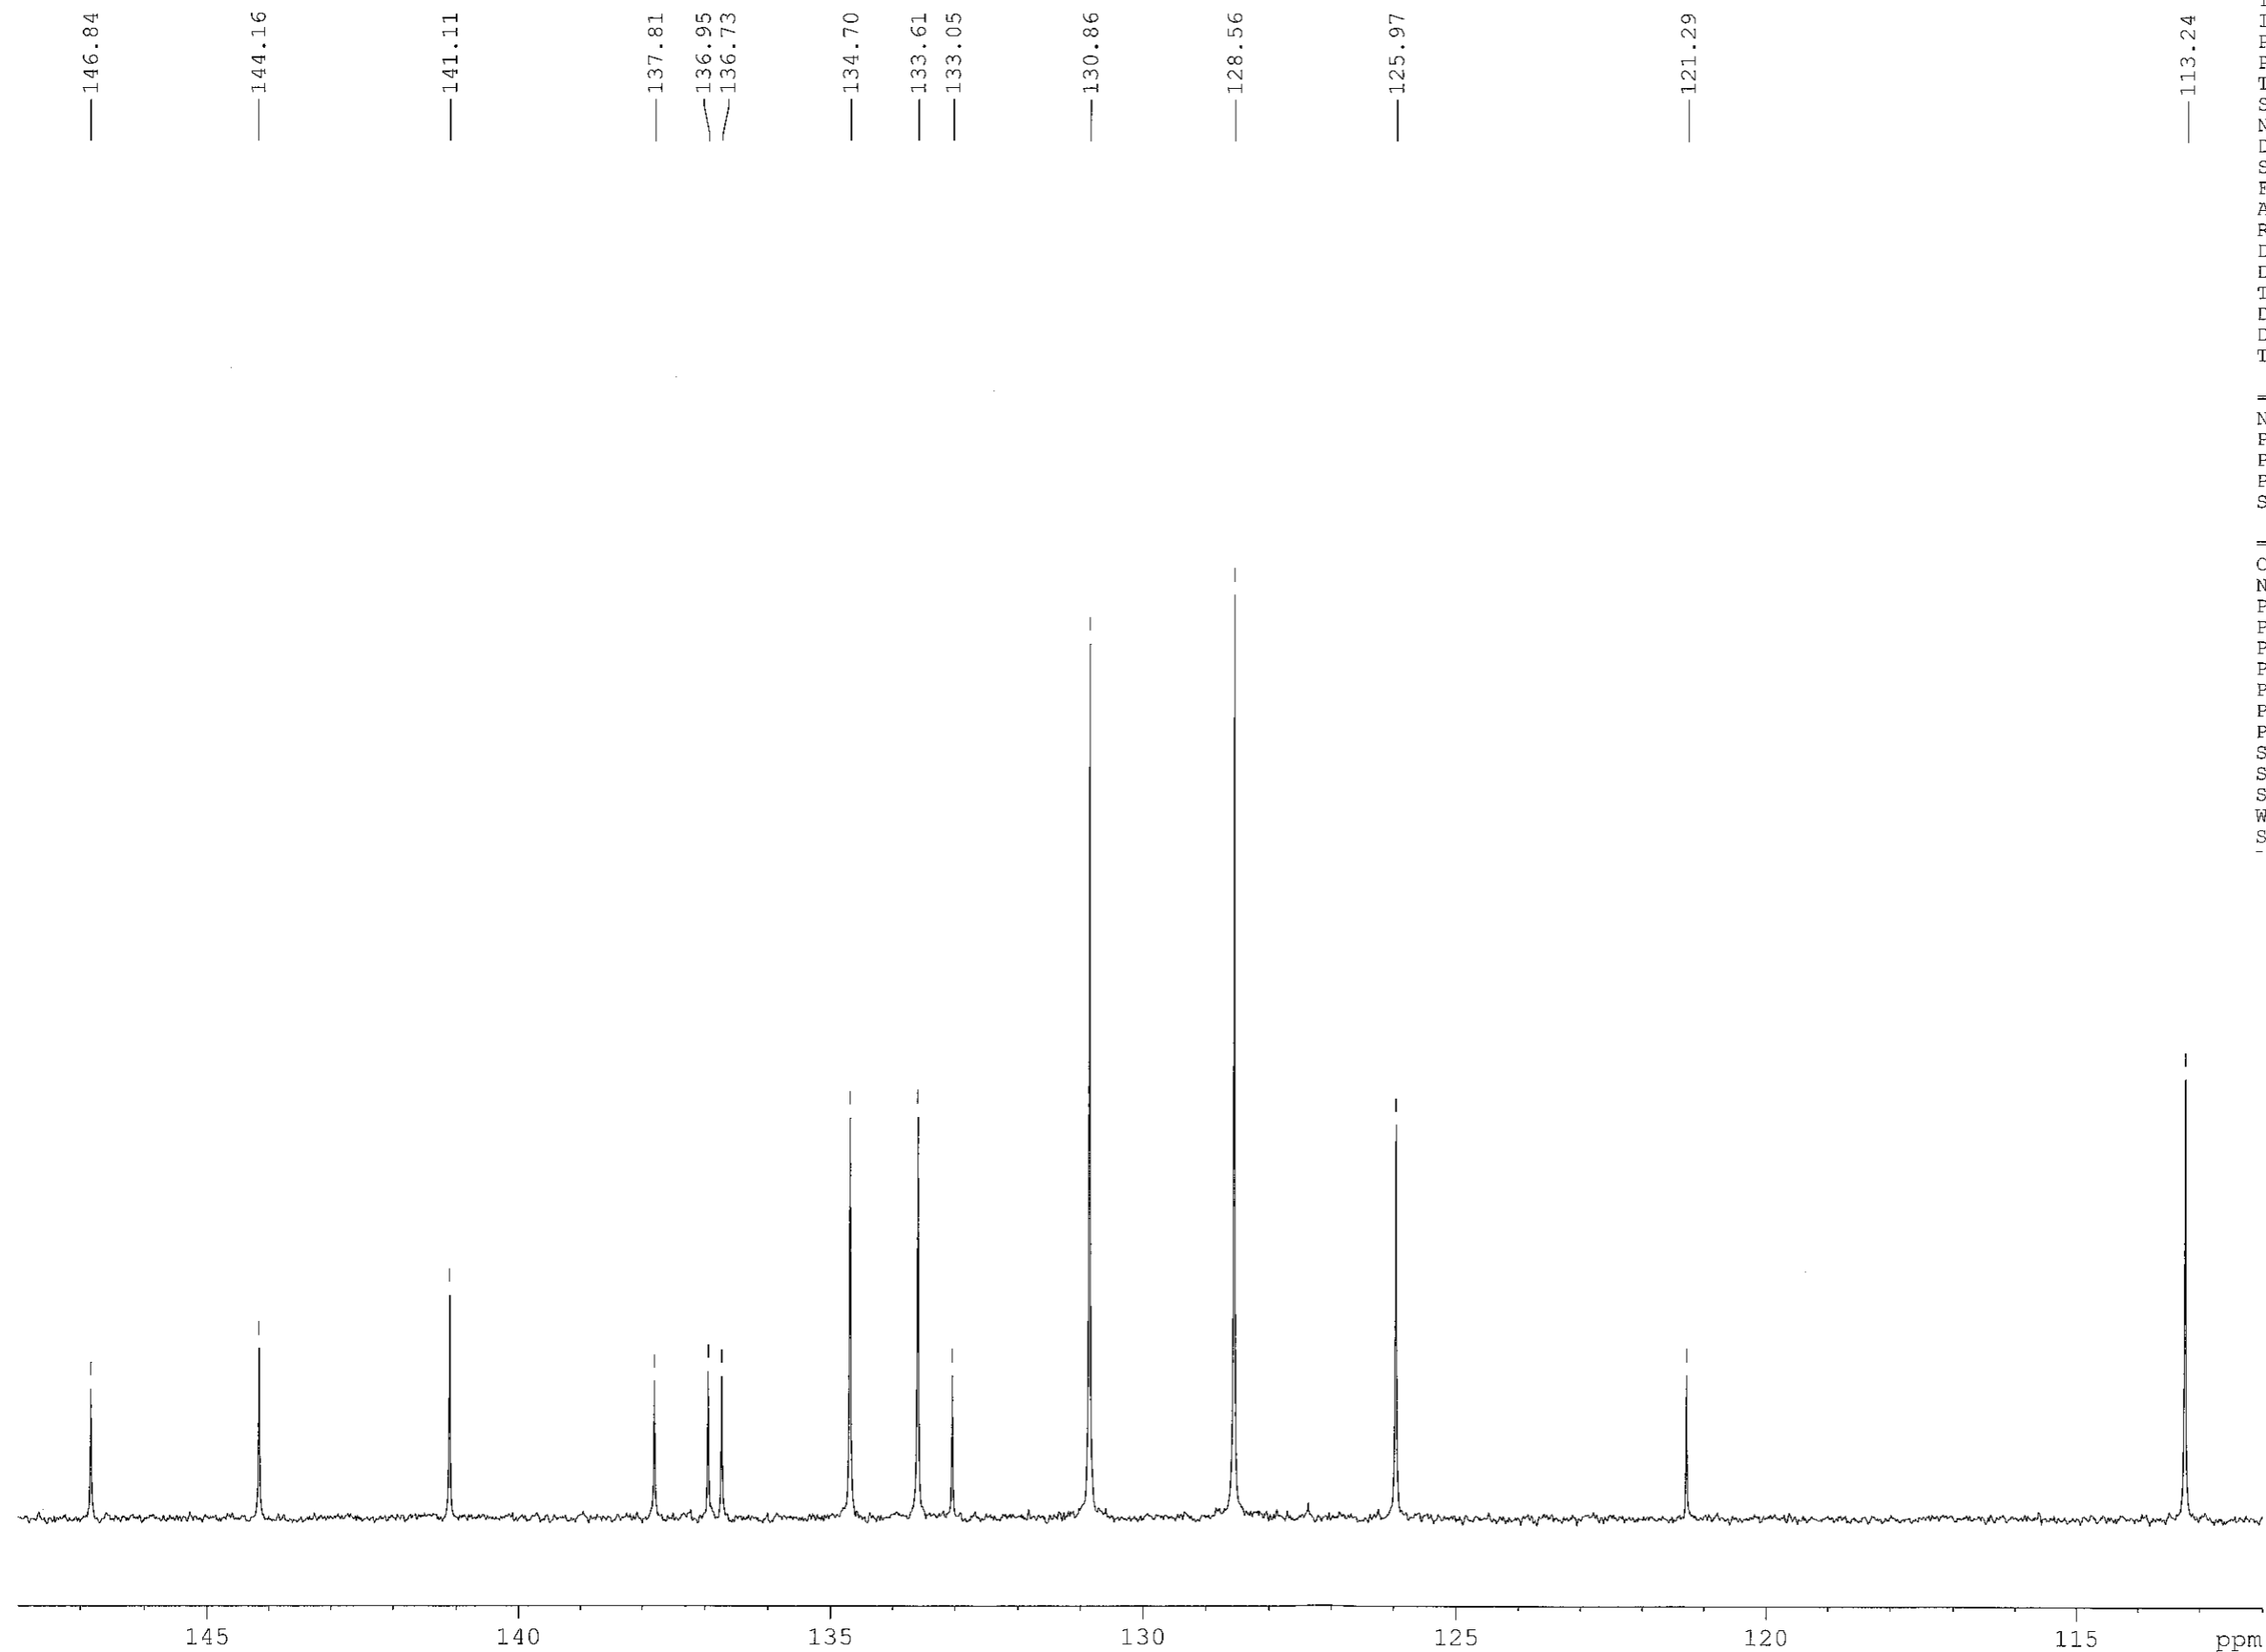

NAME 1q499-p1  
EXPNO 4  
PROCNO 1  
Date\_ 20121217  
Time 17.09  
INSTRUM spect  
PROBHD 5 mm PABBO BB-  
PULPROG zgpg  
TD 65536  
SOLVENT CDCl3  
NS 853  
DS 2  
SWH 24038.461 Hz  
FIDRES 0.366798 Hz  
AQ 1.3631988 sec  
RG 2050  
DW 20.800 usec  
DE 10.00 usec  
TE 298.0 K  
D1 5.00000000 sec  
D11 0.03000000 sec  
TD0 1

==== CHANNEL f1 =====  
NUC1 13C  
P1 6.70 usec  
PL1 -3.10 dB  
PL1W 66.67198181 W  
SFO1 100.6233333 MH:

==== CHANNEL f2 =====  
CPDPRG2 waltz16  
NUC2 1H  
PCPD2 100.00 usec  
PL2 -4.80 dB  
PL12 15.20 dB  
PL13 15.20 dB  
PL2W 24.27448273 W  
PL12W 0.24274483 W  
PL13W 0.24274483 W  
SFO2 400.1316005 MH:  
SI 32768  
SF 100.6127690 MH:  
WDW EM  
SSB 0  
-- -- --

lq499-p1

HMBC

S.SINBANDHIT

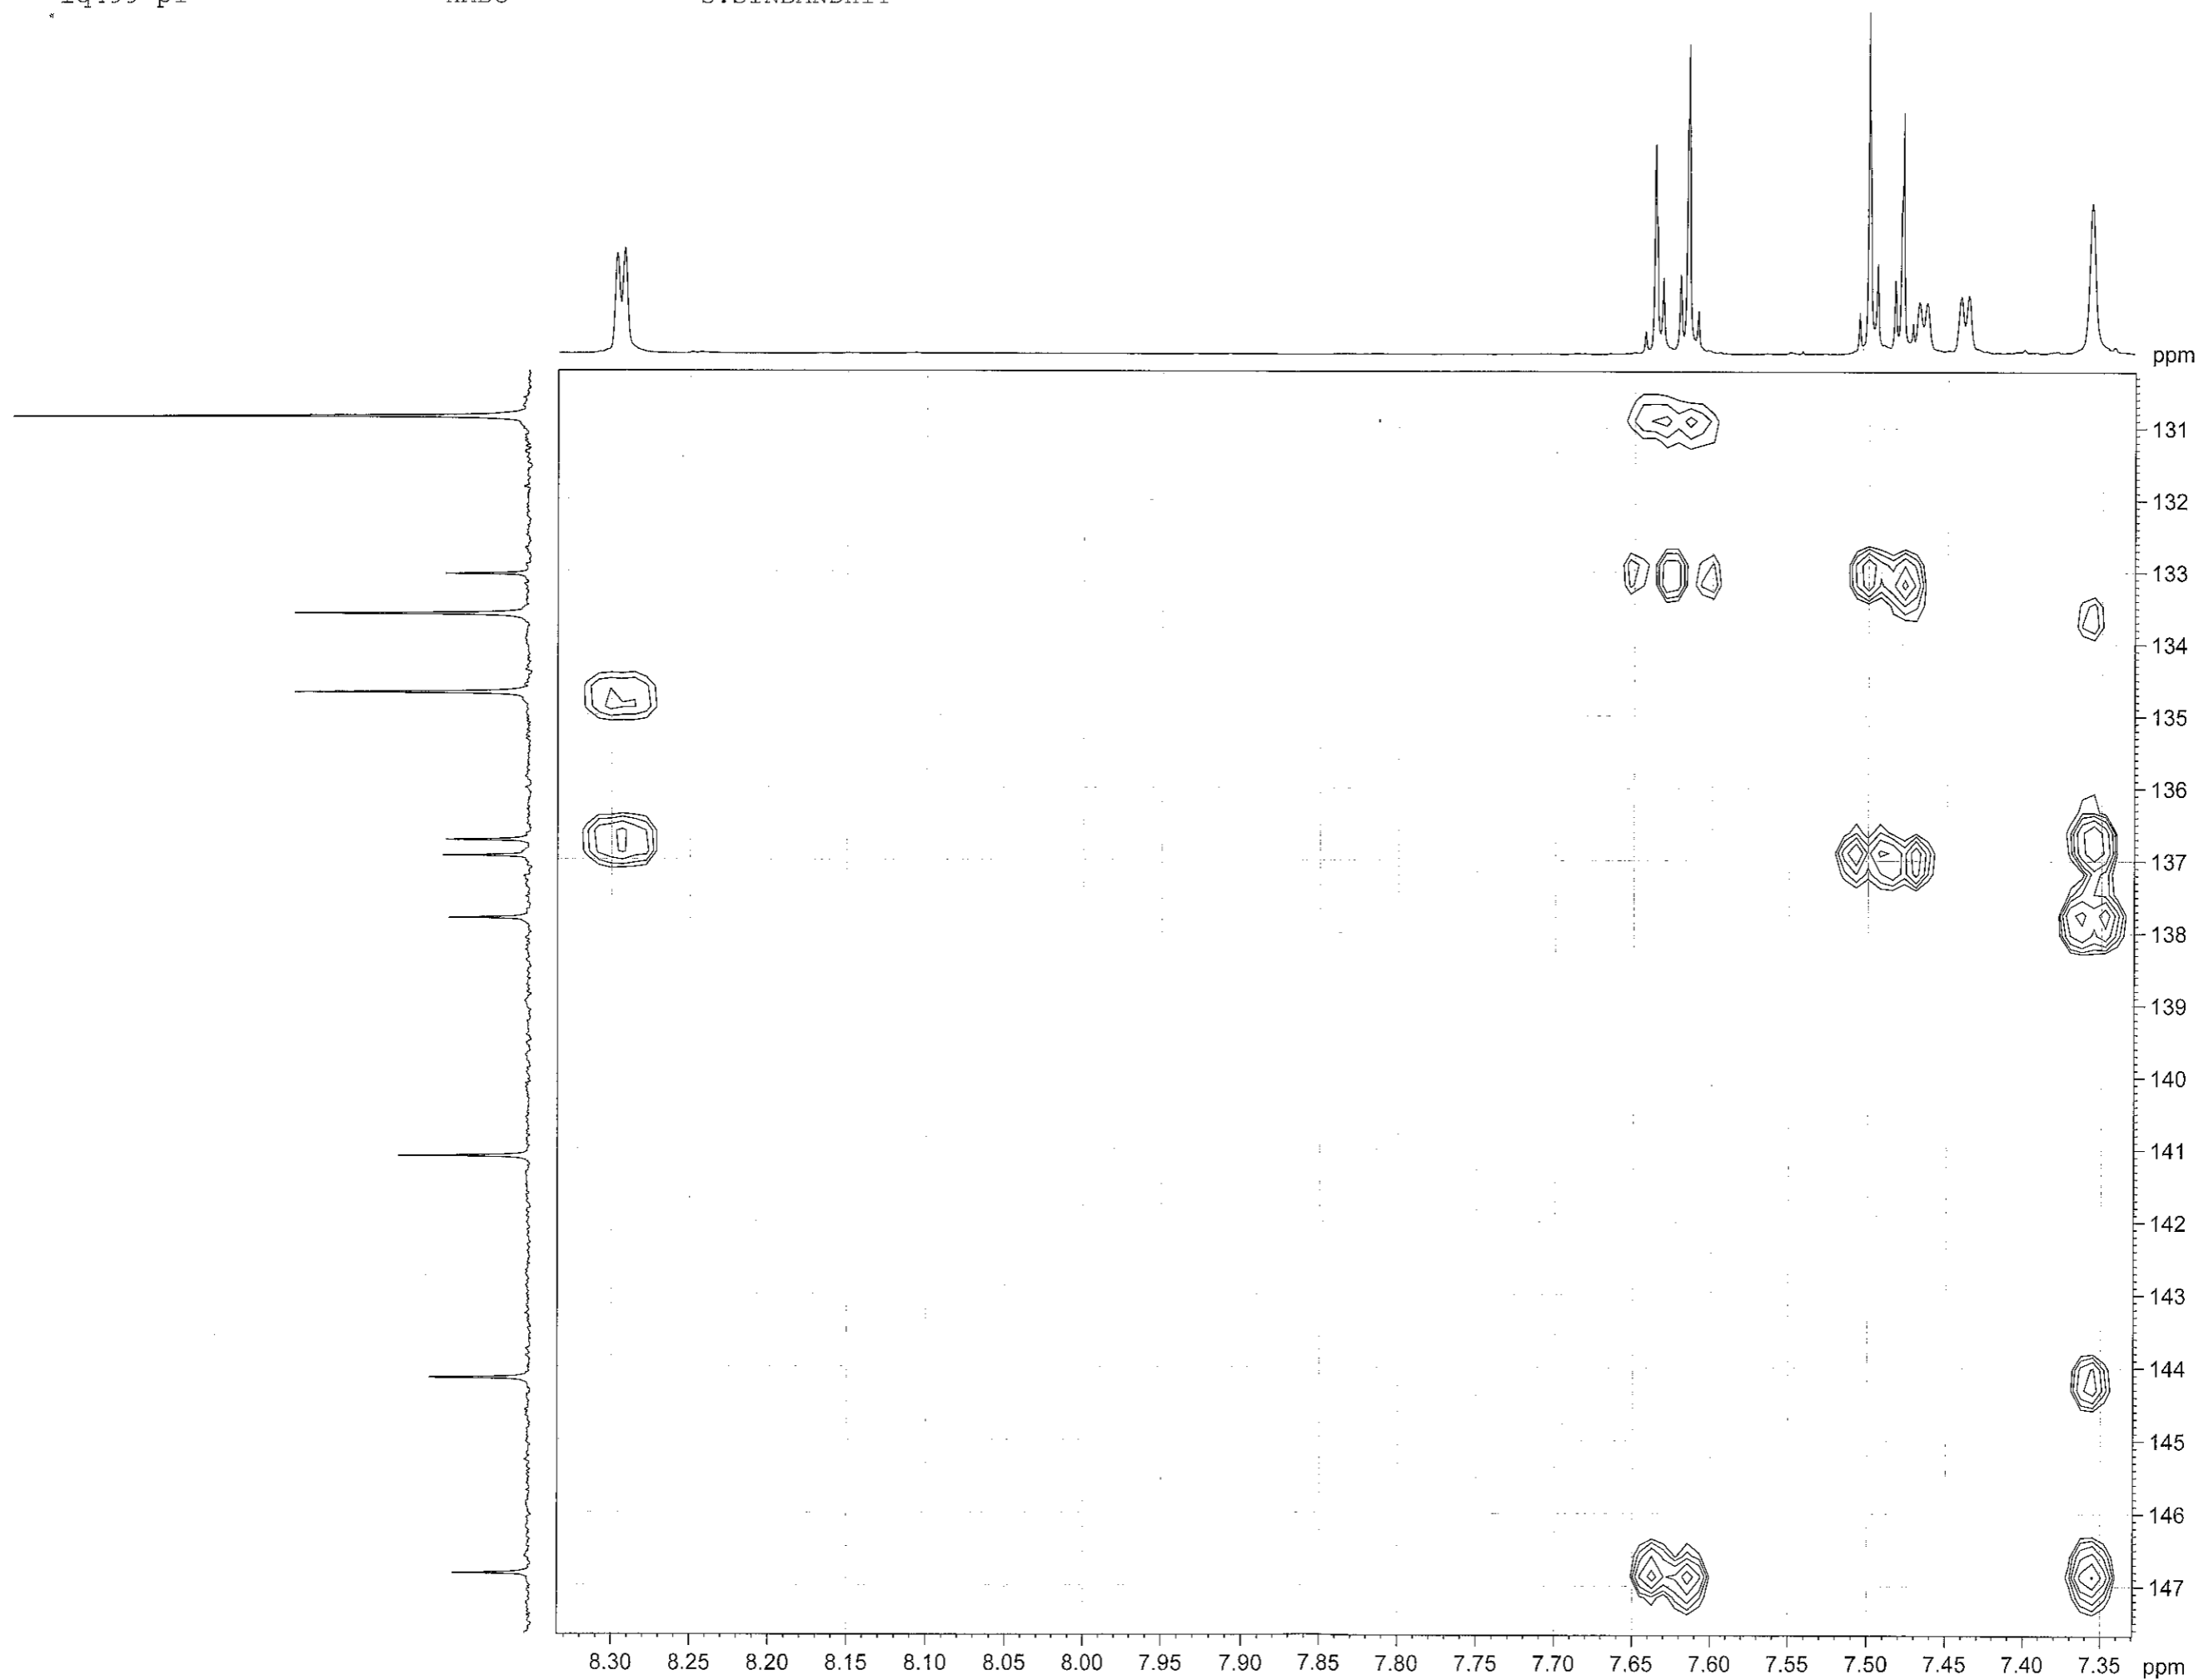

NAME lq499-p1  
EXPNO 3  
PROCNO 1  
Date\_ 20121217  
Time 22.31  
INSTRUM spect  
PROBHD 5 mm PABBO BB-  
PULPROG hmbcgp1pndqf  
TD 2048  
SOLVENT CDCl3  
NS 28  
DS 16  
SWH 3125.000 Hz  
FIDRES 1.525879 Hz  
AQ 0.3277300 sec  
RG 2050  
DW 160.000 usec  
DE 6.50 usec  
TE 297.3 K  
CNST2 138.0000000  
CNST13 6.3000002  
D0 0.00000300 sec  
D1 1.79999995 sec  
D2 0.00362319 sec  
D6 0.07936507 sec  
D16 0.00010000 sec  
IN0 0.00003405 sec

==== CHANNEL f1 =====  
NUC1 1H  
P1 10.00 usec  
P2 20.00 usec  
PL1 -4.80 dB  
PL1W 24.27448273 W  
SFO1 400.1319606 MHz

==== CHANNEL f2 =====  
NUC2 13C  
P3 9.00 usec  
PL2 -3.10 dB  
PL2W 66.67198181 W  
SFO2 100.6207174 MHz

==== GRADIENT CHANNEL =====  
GPNAM1 SINE.100  
GPNAM2 SINE.100  
GPNAM3 SINE.100  
GPZ1 50.00 %  
GPZ2 30.00 %  
GPZ3 40.10 %  
P16 1000.00 usec  
ND0 2  
TD 320  
SFO1 100.6207 MHz  
FIDRES 45.908203 Hz  
SW 146.000 ppm  
FrMODE QF  
SI 1024  
SF 400.1299988 MHz  
WDW QSINE  
SSB 4  
LB 0.00 Hz  
GB 0  
PC 1.40  
SI 512  
MC2 QF  
SF 100.6127550 MHz  
WDW QSINE  
SSB 4  
LB 0.00 Hz  
GB 0

1q499-p1

HMBC

S. SINBANDHIT

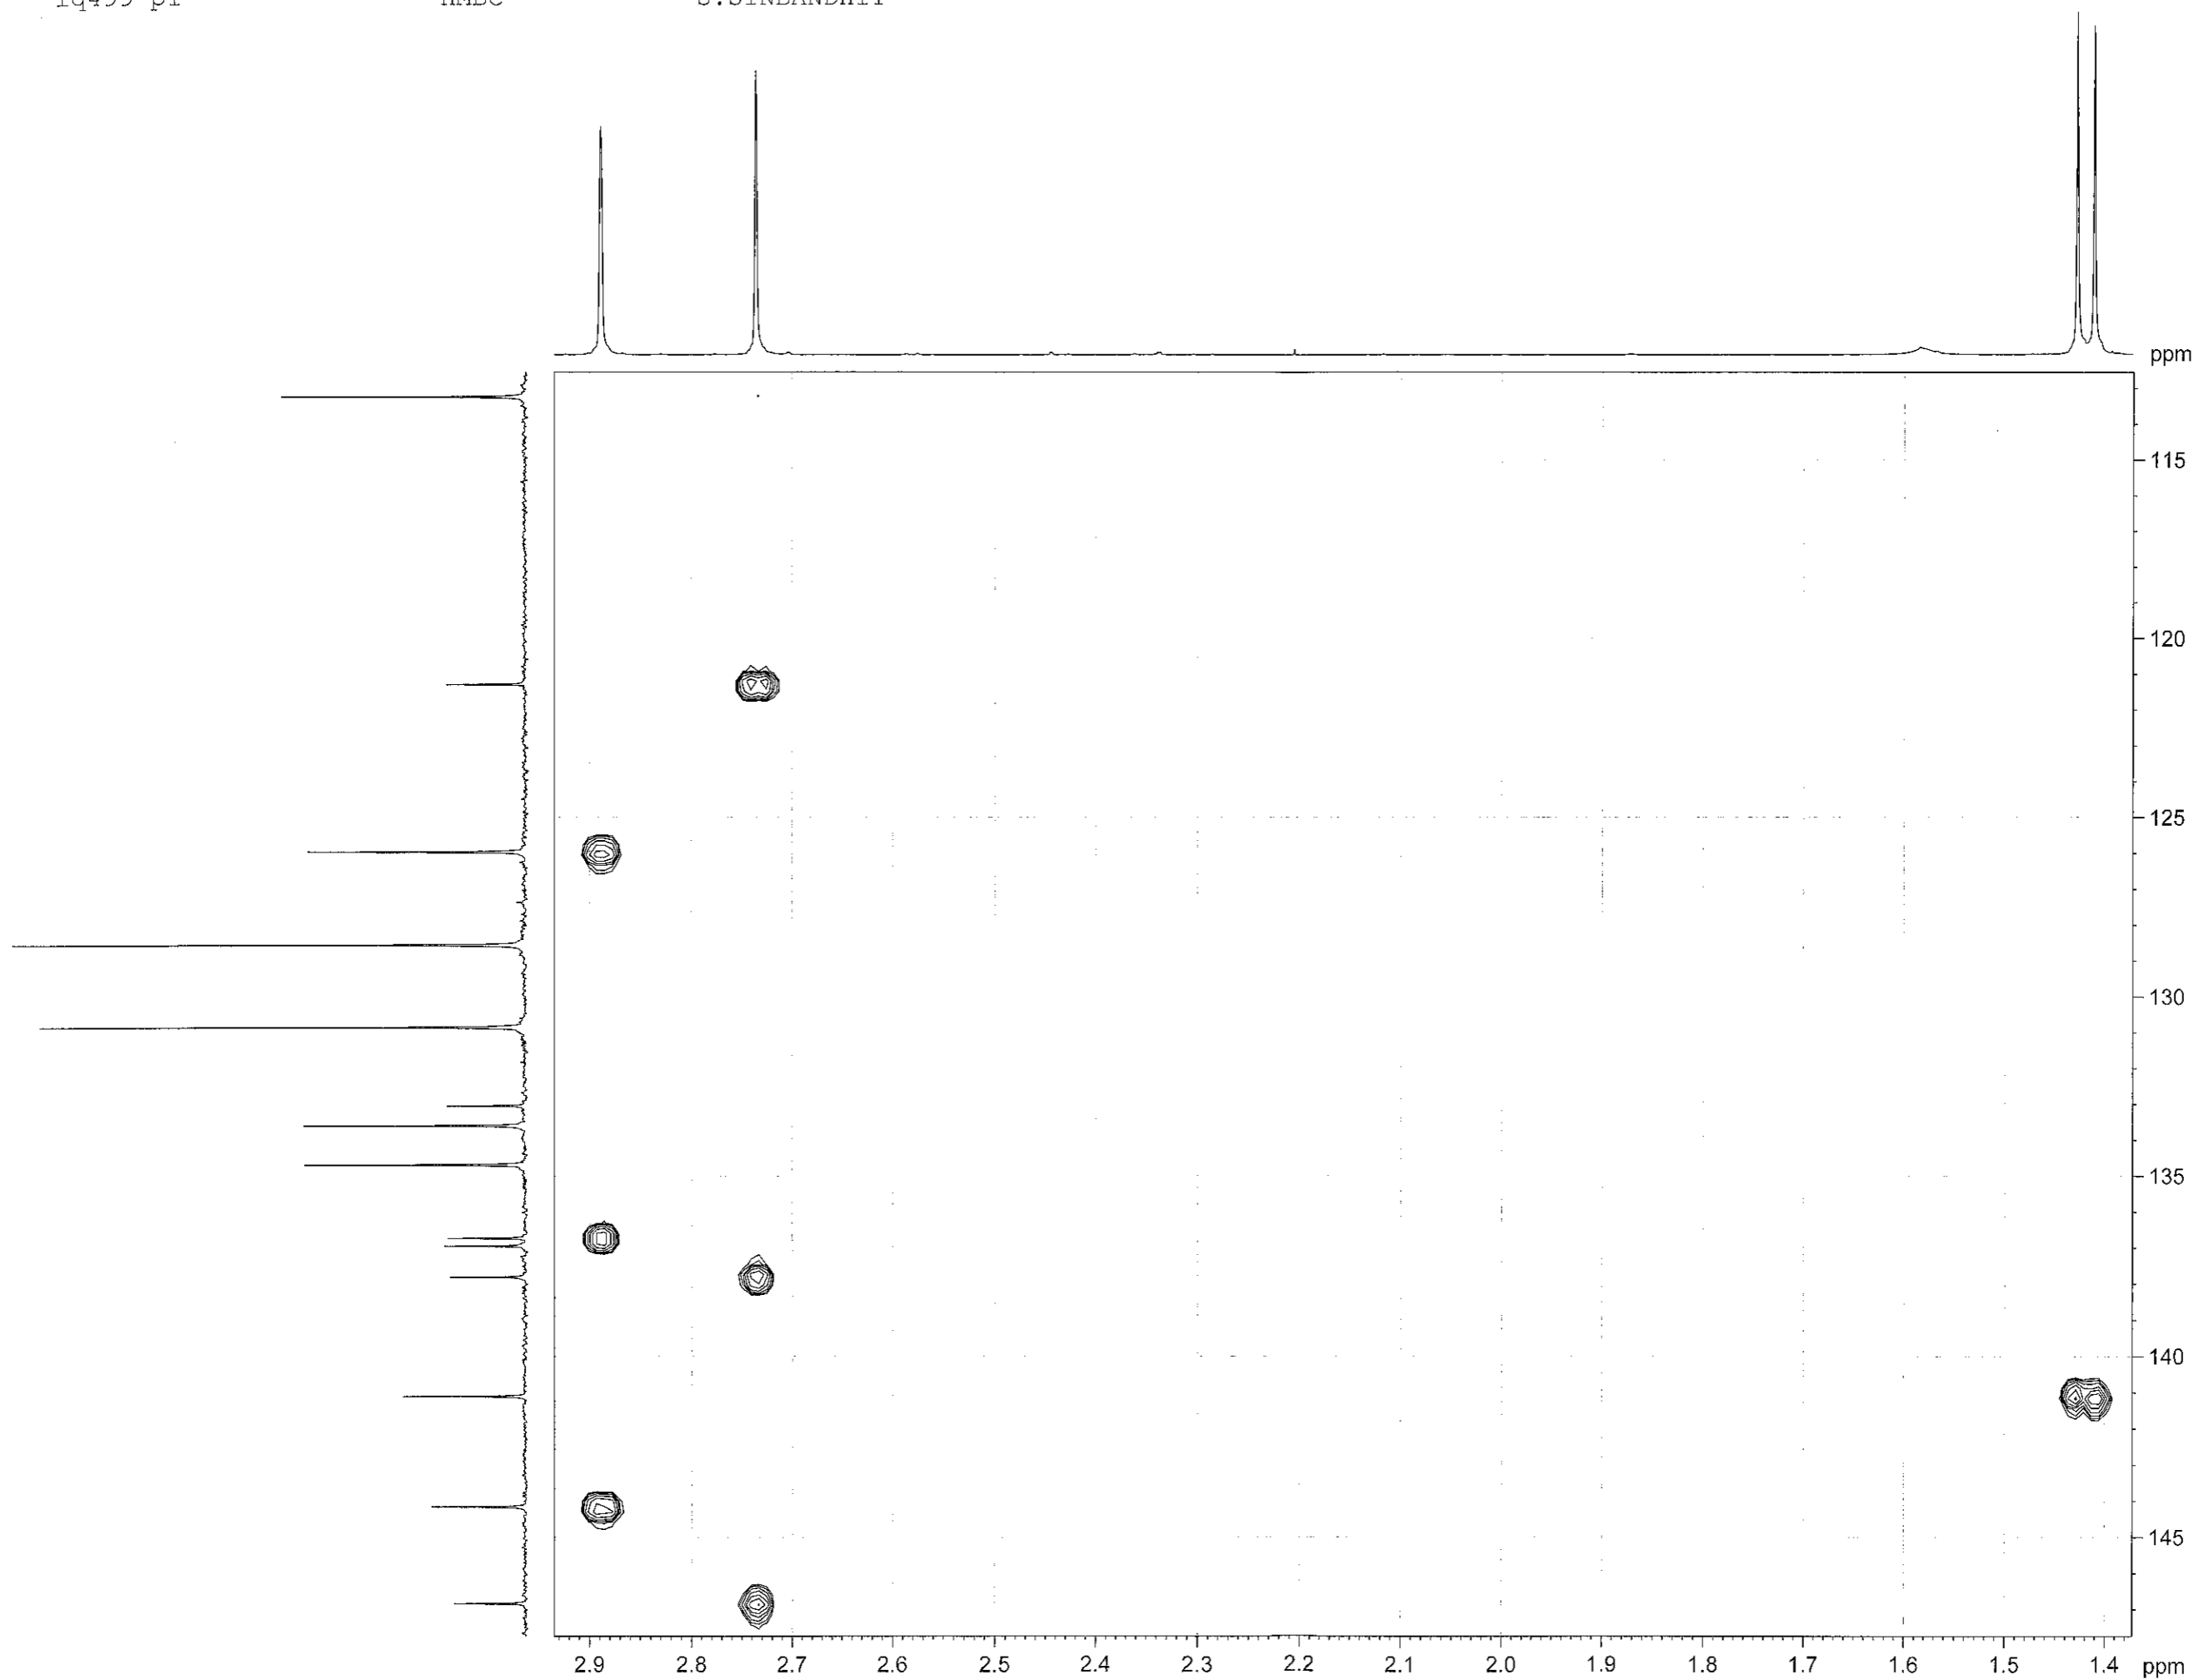

```
NAME          1q499-p1
EXPNO          3
PROCNO         1
Date_          20121217
Time           22.31
INSTRUM        spect
PROBHD         5 mm PABBO BB-
PULPROG        hmbcgp1pndqf
TD             2048
SOLVENT        CDCl3
NS             28
DS             16
SWH            3125.000 Hz
FIDRES         1.525879 Hz
AQ             0.3277300 sec
RG             2050
DW             160.000 usec
DE             6.50 usec
TE             297.3 K
CNST2          138.0000000
CNST13         6.3000002
DO             0.00000300 sec
D1             1.79999995 sec
D2             0.00362319 sec
D6             0.07936507 sec
D16            0.00010000 sec
IN0            0.00003405 sec
```

```
===== CHANNEL f1 =====
NUC1           1H
P1             10.00 usec
P2             20.00 usec
PL1            -4.80 dB
PL1W           24.27448273 W
SFO1           400.1319606 MHz
```

```
===== CHANNEL f2 =====
NUC2           13C
P3             9.00 usec
PL2            -3.10 dB
PL2W           66.67198181 W
SFO2           100.6207174 MHz
```

```
===== GRADIENT CHANNEL =====
GPNAM1         SINE.100
GPNAM2         SINE.100
GPNAM3         SINE.100
GPZ1           50.00 %
GPZ2           30.00 %
GPZ3           40.10 %
P16            1000.00 usec
ND0            2
TD             320
SFO1           100.6207 MHz
FIDRES         45.908203 Hz
SW             146.000 ppm
FrMODE         QF
SI             1024
SF             400.1299988 MHz
WDW            QSINE
SSB            4
LB             0.00 Hz
GB             0
PC             1.40
SI             512
MC2            QF
SF             100.6127550 MHz
WDW            QSINE
SSB            4
LB             0.00 Hz
GB             0
```



1q499-p1

HMBC

S. SINBANDHIT

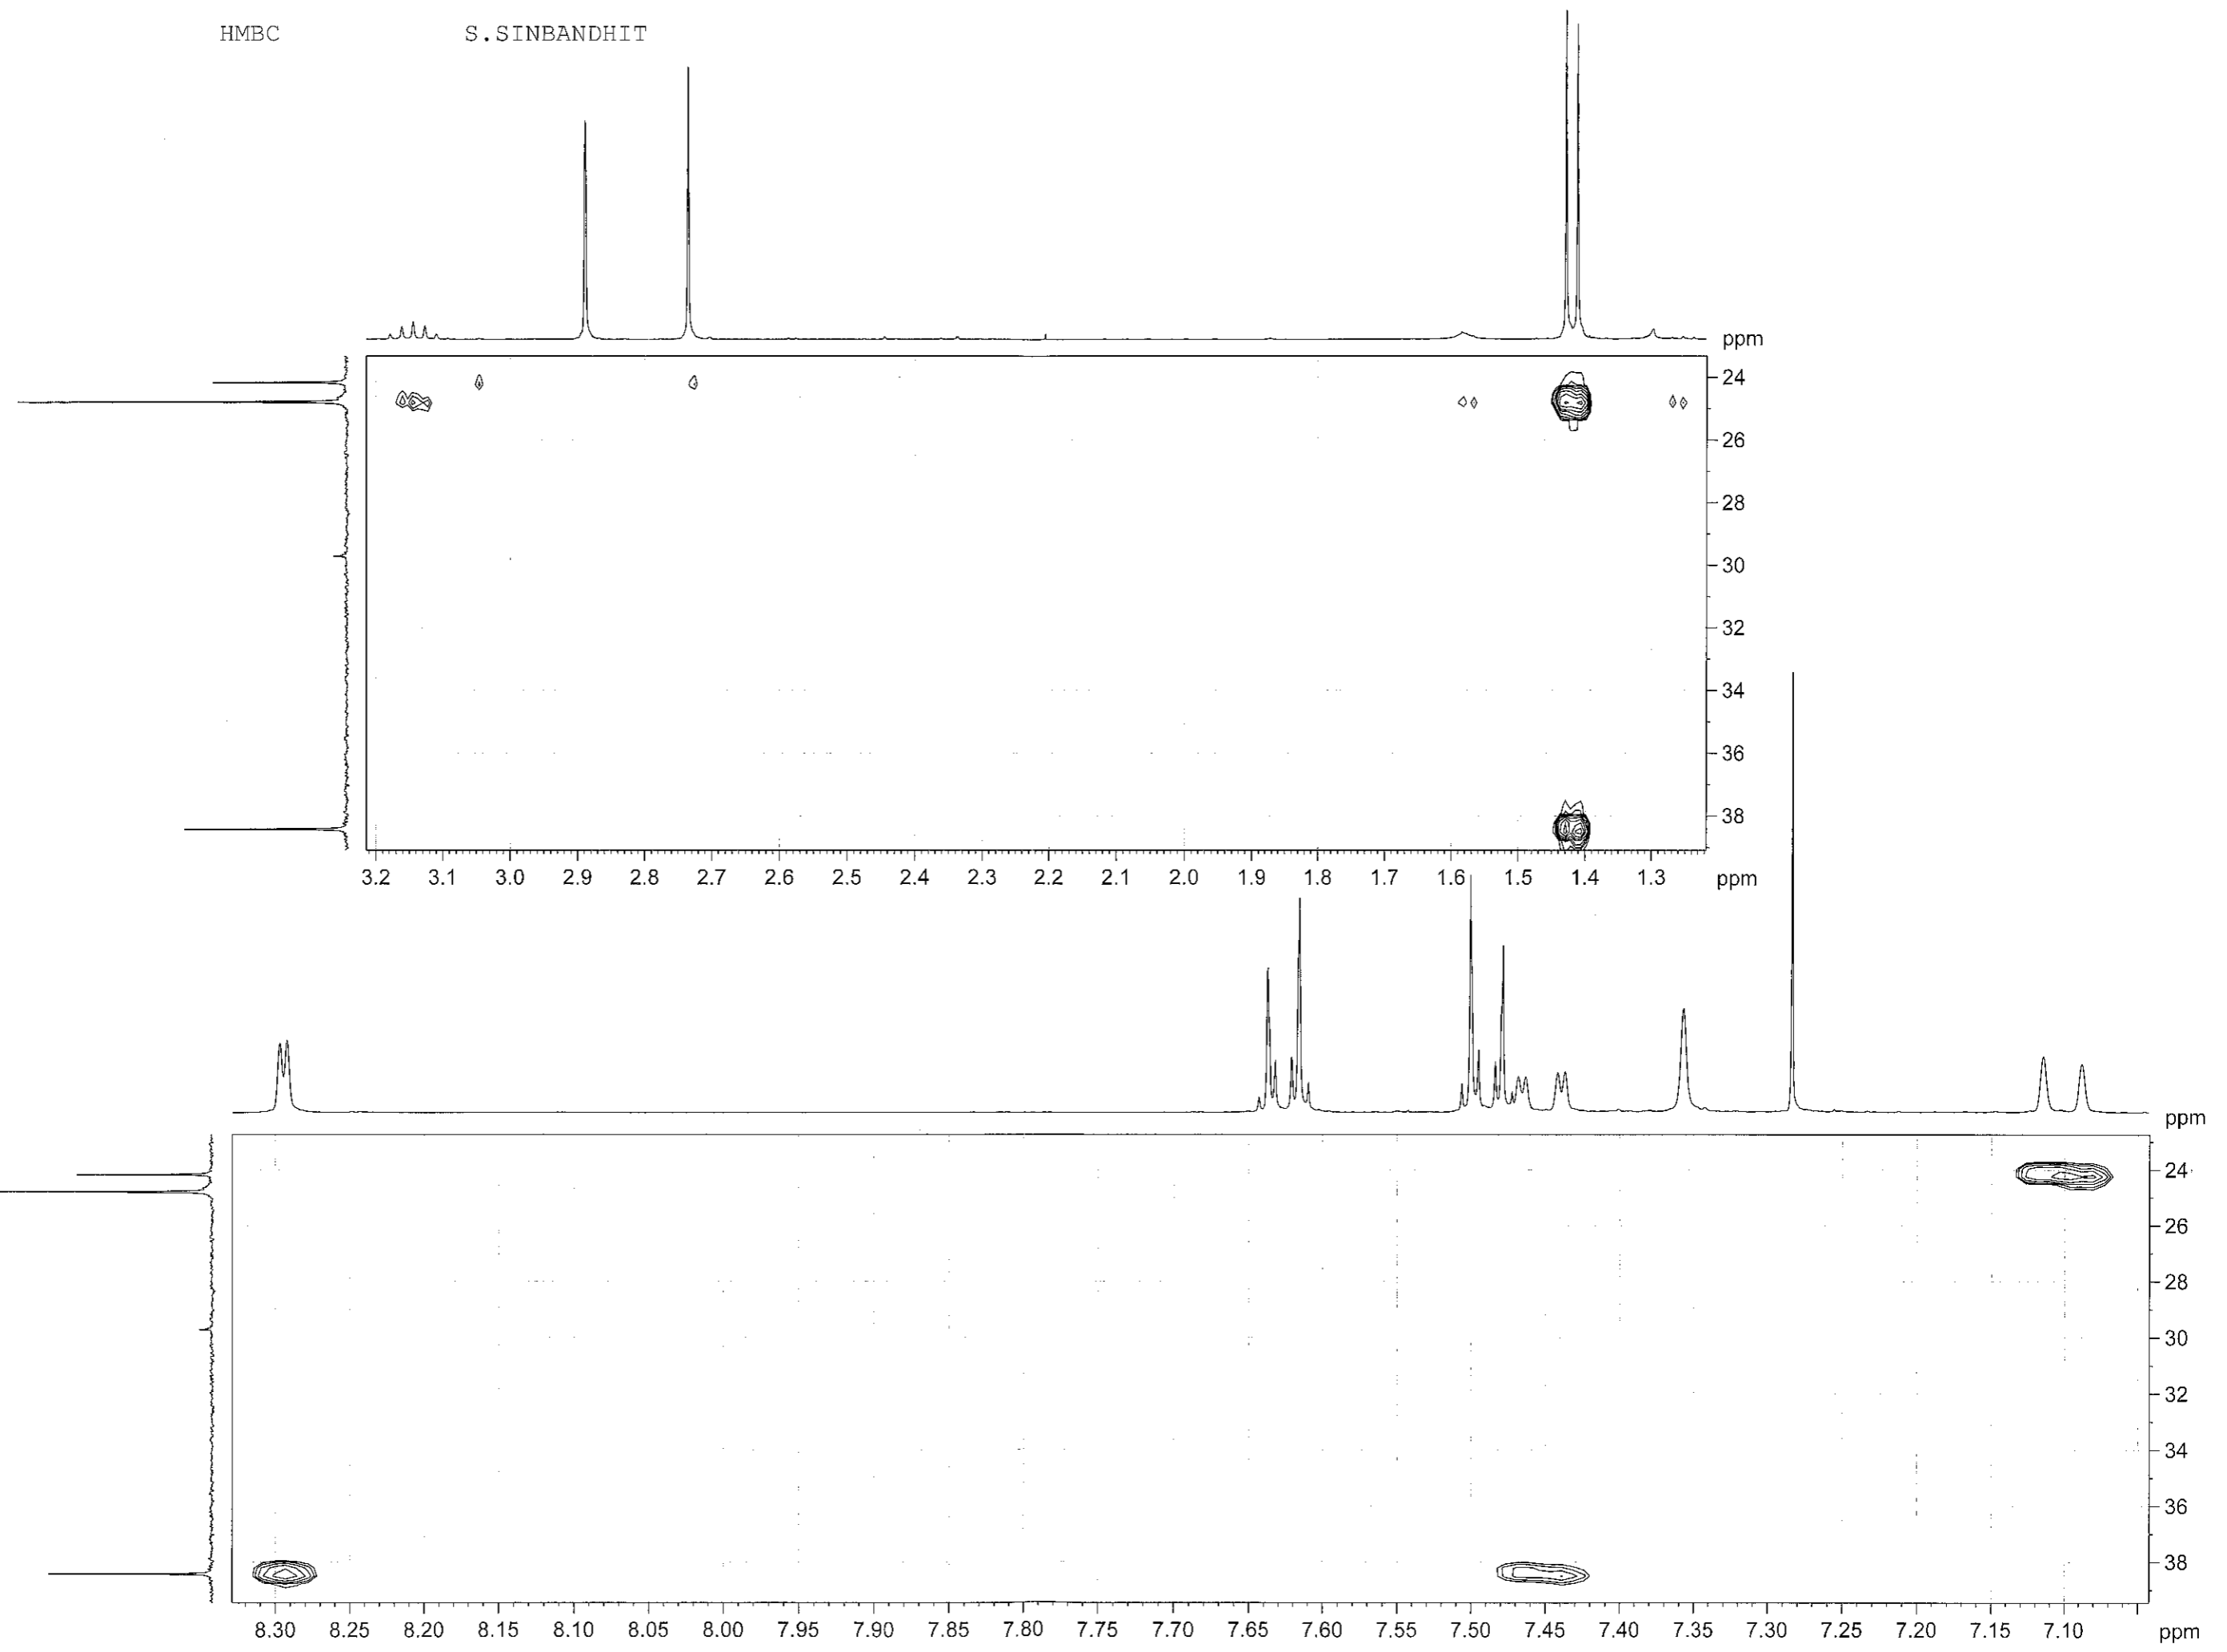

1q499-p1

HMBC

S. SINBANDHIT

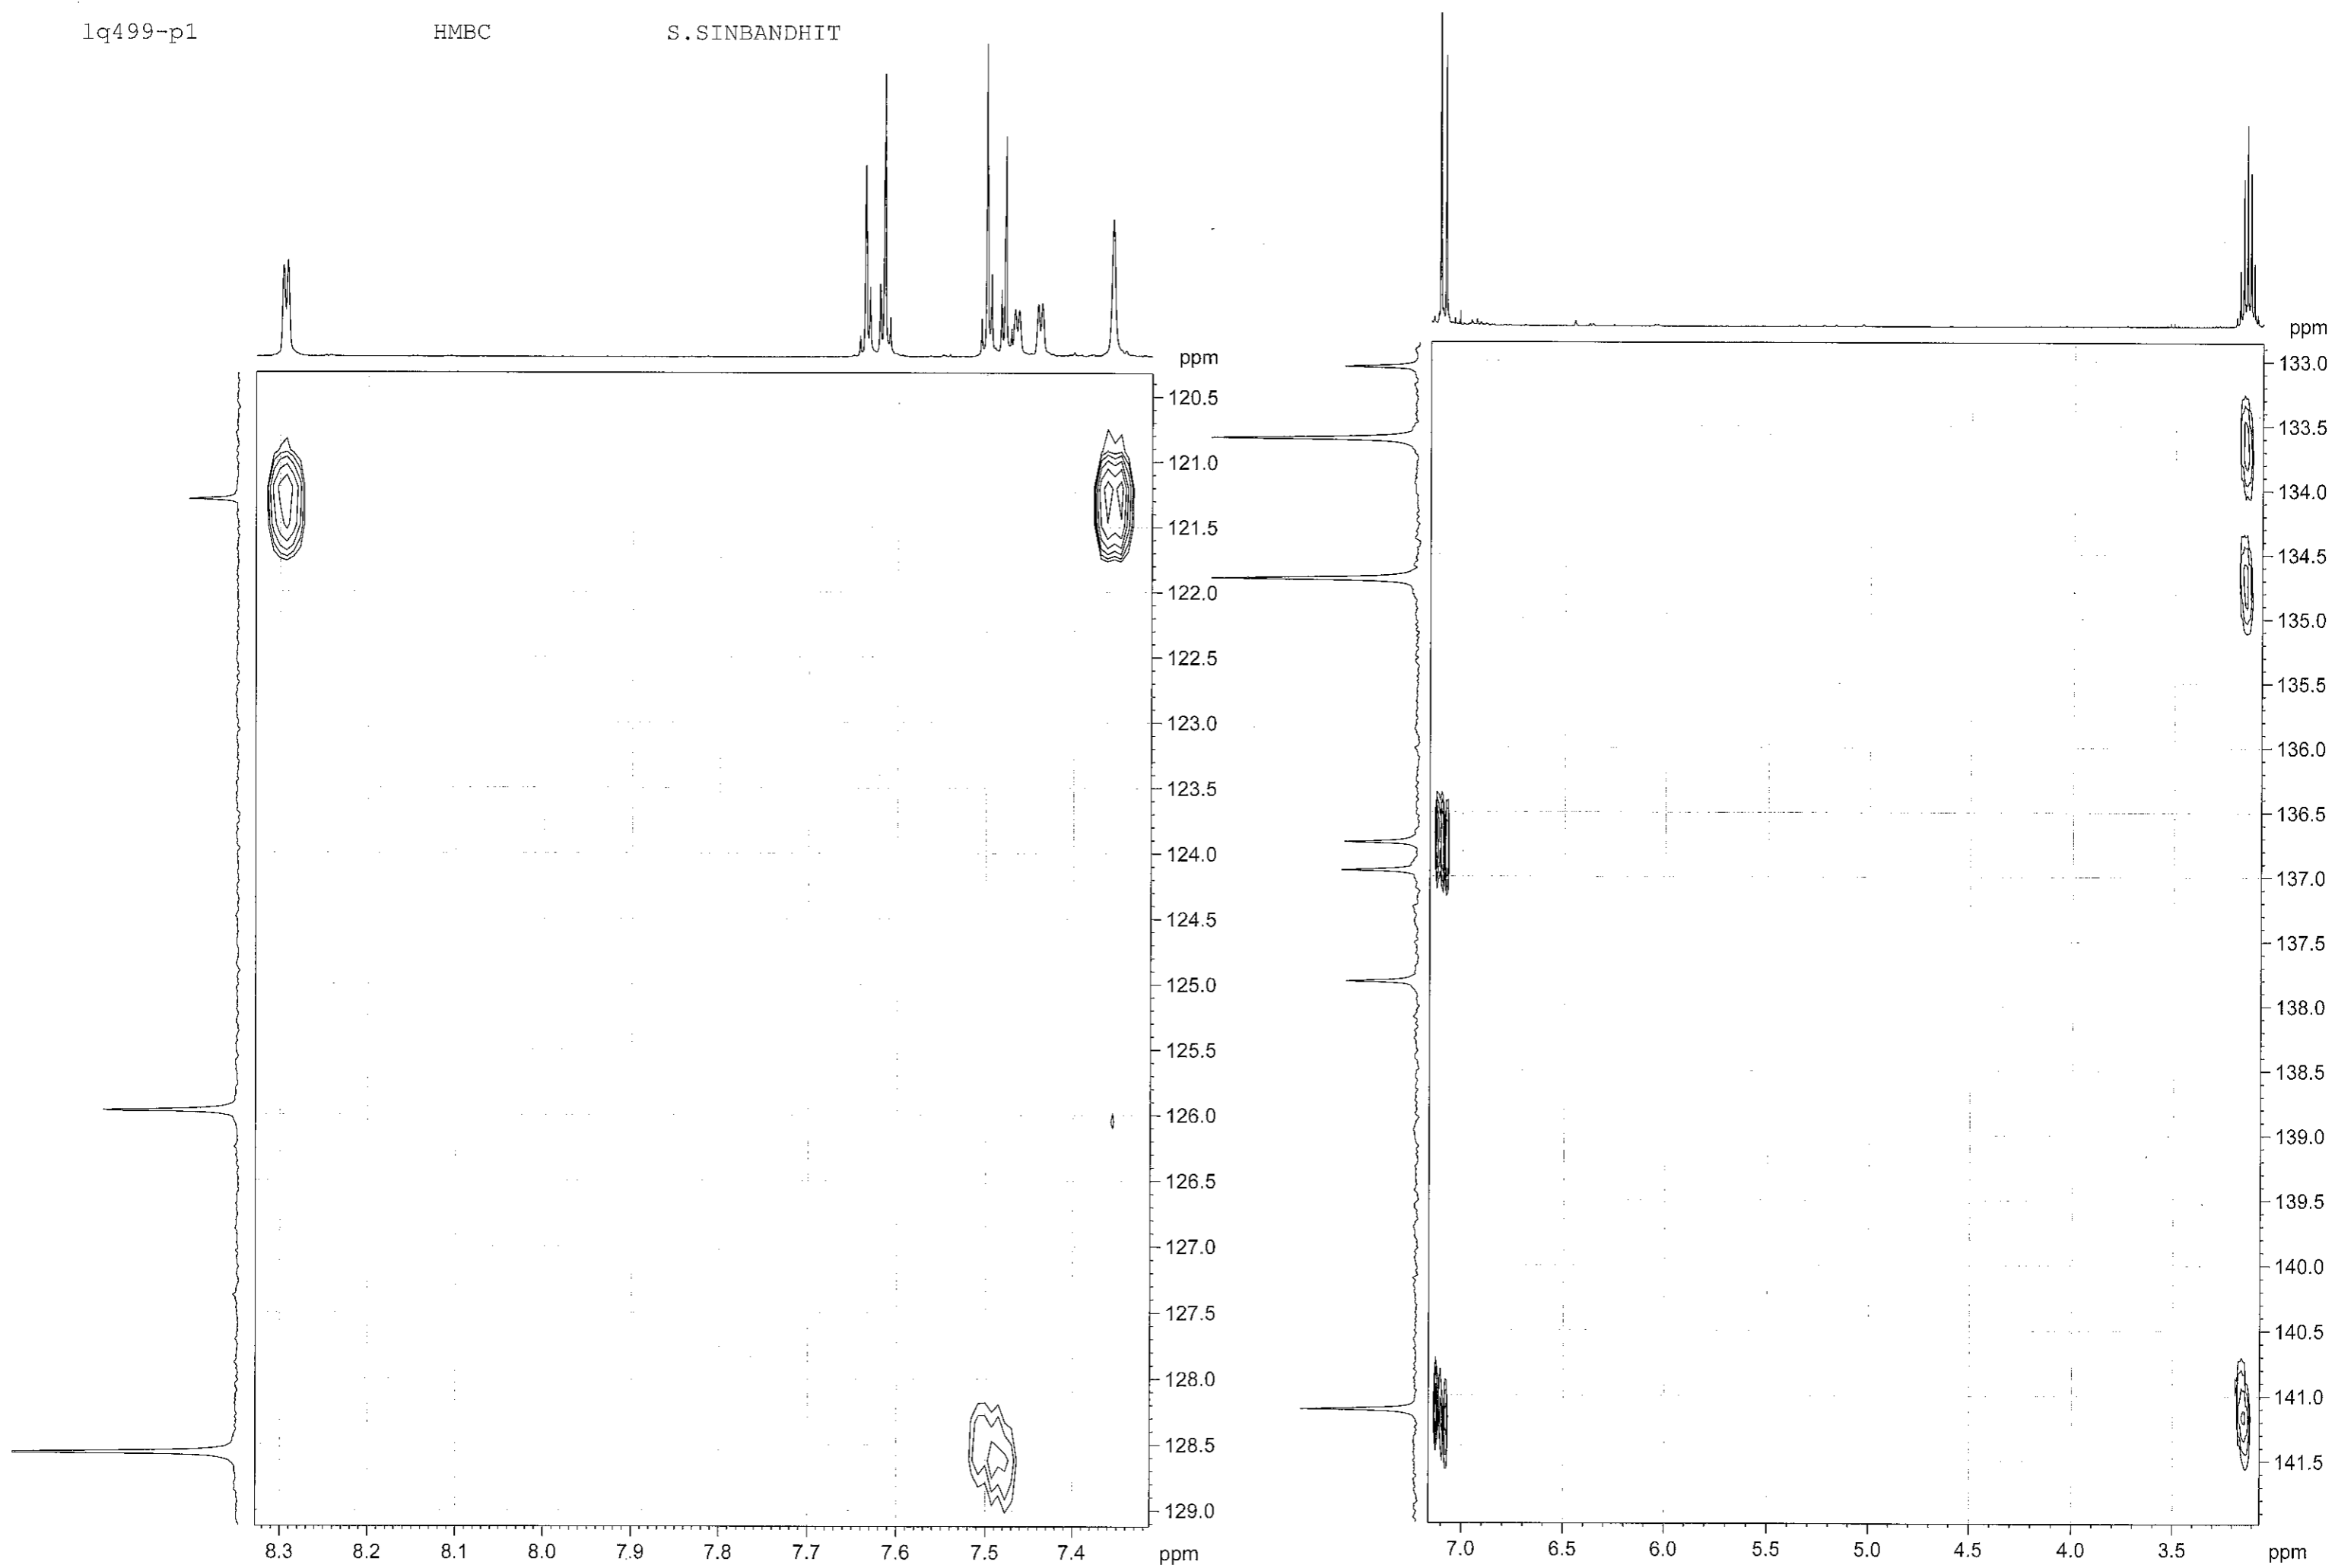

1q499-p1

HMQC

S. SINBANDHIT

6b

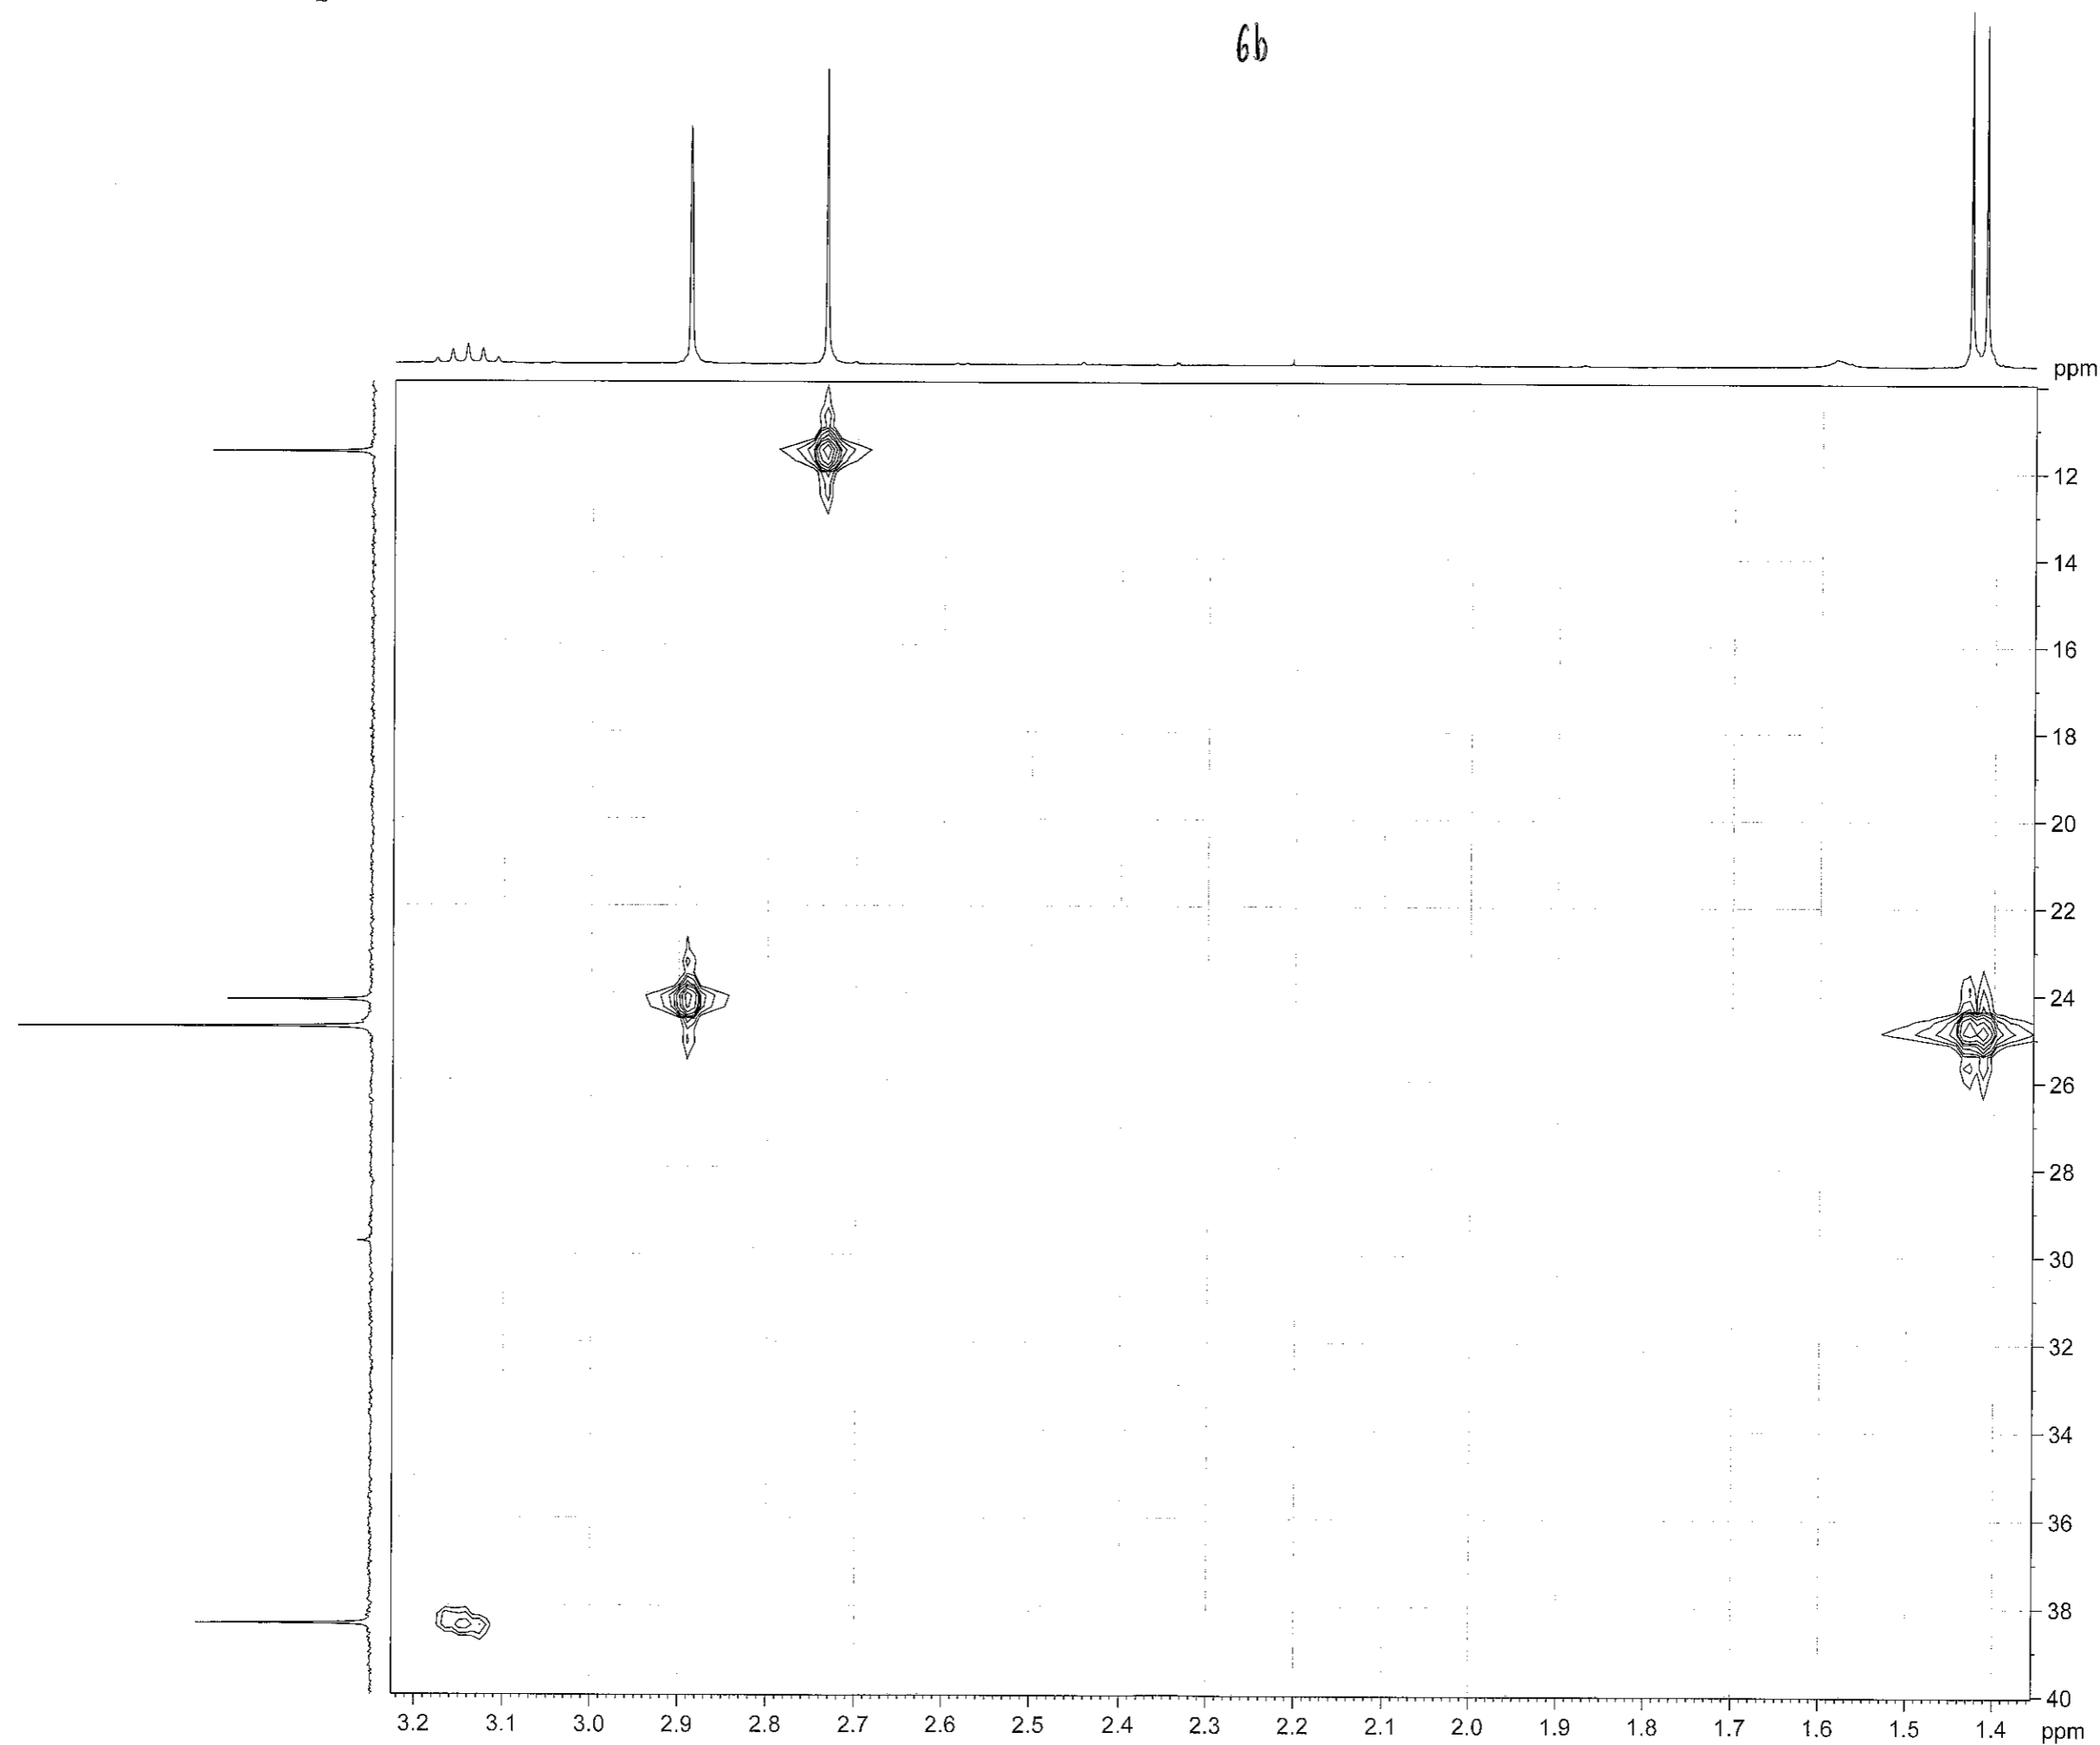

```
NAME          1q499-p1
EXPNO         2
PROCNO        1
Date_         20121217
Time_         18.41
INSTRUM       spect
PROBHD        5 mm PABBO BB-
PULPROG       hmqcgpqf
TD            2048
SOLVENT       CDCl3
NS            20
DS            16
SWH           3205.128 Hz
FIDRES        1.565004 Hz
AQ            0.3195380 sec
RG            2050
DW            156.000 usec
DE            6.50 usec
TE            297.9 K
CNST2         150.0000000
D0            0.00000300 sec
D1            1.79999995 sec
D2            0.00333333 sec
D12           0.00002000 sec
D13           0.00000400 sec
D16           0.00010000 sec
IN0           0.00003710 sec

===== CHANNEL f1 =====
NUC1           1H
P1             10.00 usec
P2             20.00 usec
PL1            -4.80 dB
PL1W           24.27448273 W
SFO1           400.1319606 MHz

===== CHANNEL f2 =====
CPDPRG2        garp
NUC2           13C
P3             9.00 usec
PCPD2          80.00 usec
PL2            -3.10 dB
PL12           15.50 dB
PL2W           66.67198181 W
PL12W          0.92032951 W
SFO2           100.6201137 MHz

===== GRADIENT CHANNEL =====
GPNAM1         SINE.100
GPNAM2         SINE.100
GPNAM3         SINE.100
GPZ1           50.00 %
GPZ2           30.00 %
GPZ3           40.10 %
P16            1000.00 usec
ND0            2
TD             320
SFO1           100.6201 MHz
FIDRES         42.134674 Hz
SW             134.000 ppm
FnMODE         QF
SI             1024
SF             400.1299980 MHz
WDW            QSINE
SSB            4
LB             0.00 Hz
GB             0
PC             1.40
SI             512
MC2            QF
SF             100.6127540 MHz
WDW            QSINE
SSB            4
LB             0.00 Hz
GB             0
```

1q499-p1

HMQC

S. SINBANDHIT

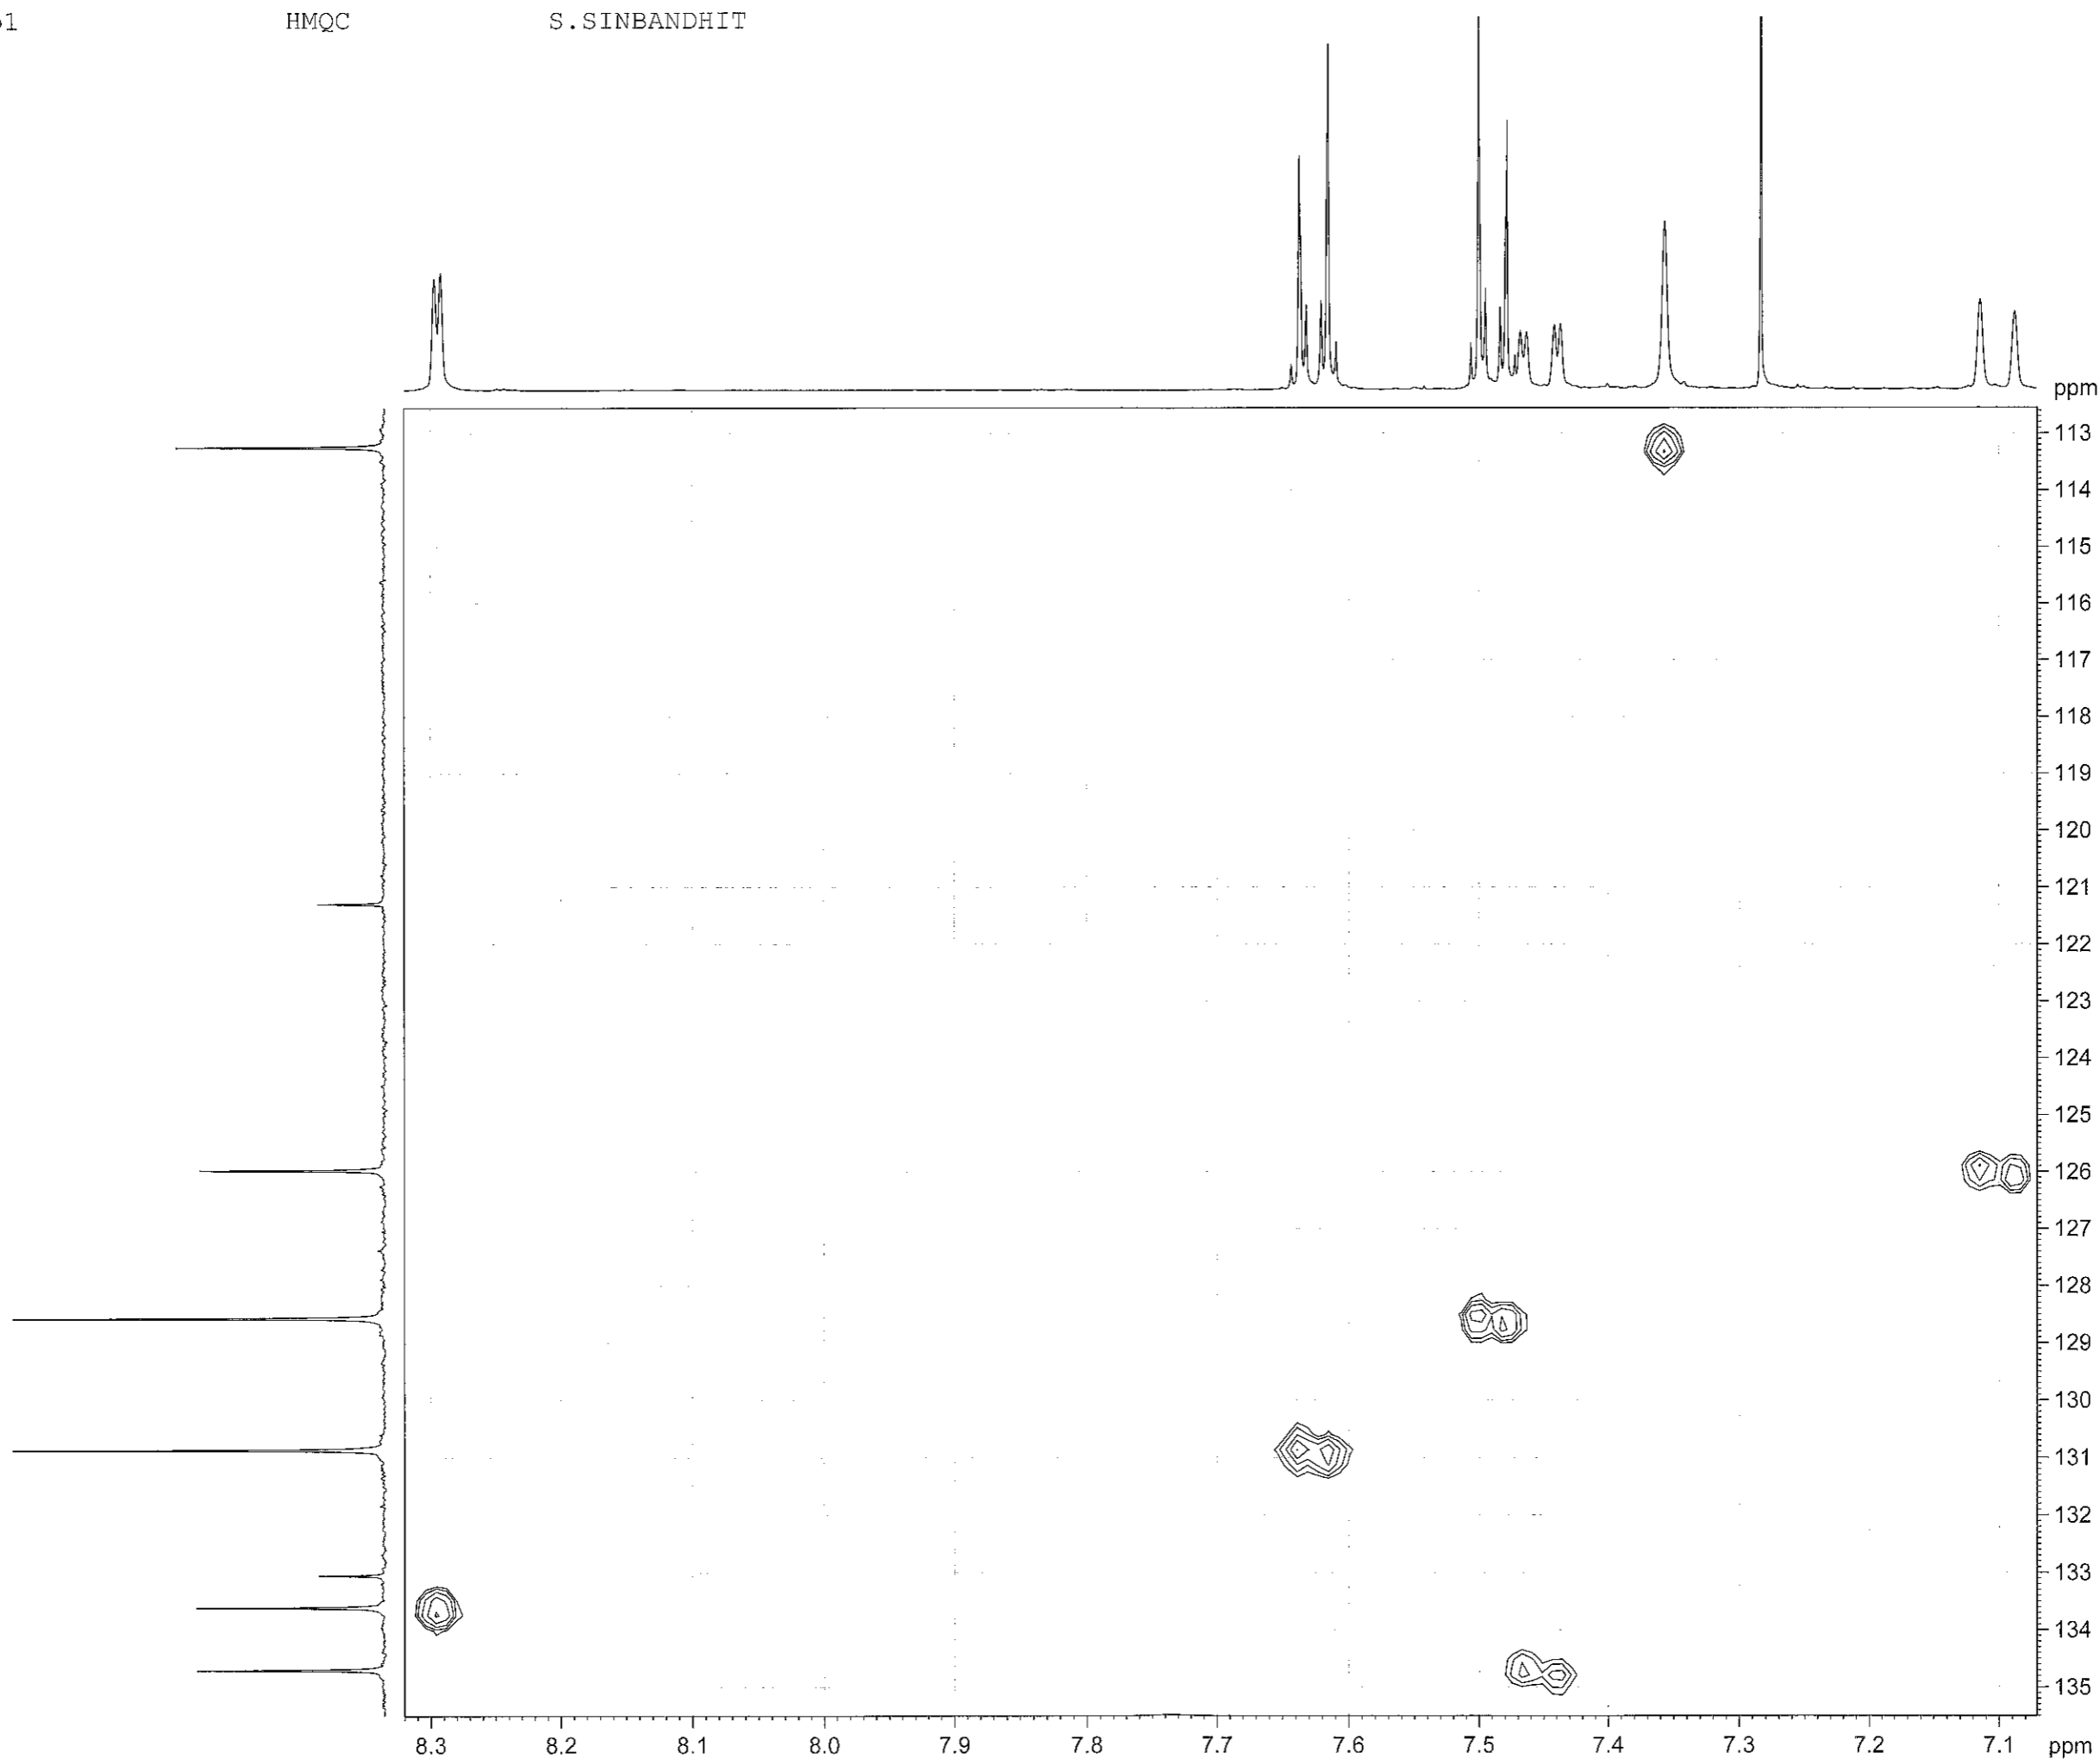

```
NAME          1q499-p1
EXPNO         2
PROCNO        1
Date_         20121217
Time          18.41
INSTRUM       spect
PROBHD        5 mm PABBO BB-
PULPROG       hmqcpgpqf
TD            2048
SOLVENT       CDCl3
NS            20
DS            16
SWH           3205.128 Hz
FIDRES        1.565004 Hz
AQ            0.3195380 sec
RG            2050
DW            156.000 usec
DE            6.50 usec
TE            297.9 K
CNST2         150.0000000
DO            0.00000300 sec
D1            1.79999995 sec
D2            0.00333333 sec
D12           0.00002000 sec
D13           0.00000400 sec
D16           0.00010000 sec
IN0           0.00003710 sec

===== CHANNEL f1 =====
NUC1           1H
P1             10.00 usec
P2             20.00 usec
PL1            -4.80 dB
PL1W           24.27448273 W
SFO1           400.1319606 MHz

===== CHANNEL f2 =====
CPDPRG2       garp
NUC2           13C
P3             9.00 usec
PCPD2         80.00 usec
PL2            -3.10 dB
PL12           15.50 dB
PL2W           66.67198181 W
PL12W          0.92032951 W
SFO2           100.6201137 MHz

===== GRADIENT CHANNEL =====
GPNAM1        SINE.100
GPNAM2        SINE.100
GPNAM3        SINE.100
GPZ1           50.00 %
GPZ2           30.00 %
GPZ3           40.10 %
P16           1000.00 usec
ND0            2
TD             320
SFO1           100.6201 MHz
FIDRES         42.134674 Hz
SW             134.000 ppm
FMODE          QF
SI             1024
SF             400.1299980 MHz
WDW            QSINE
SSB            4
LB             0.00 Hz
GB             0
PC             1.40
SI             512
MC2            QF
SF             100.6127540 MHz
WDW            QSINE
SSB            4
LB             0.00 Hz
GB             0
```
